# Supplementary material for: Neutralizing antibody correlate of protection against severe-critical COVID-19 in the ENSEMBLE single-dose Ad26.COV2.S vaccine efficacy trial
Source: PubMed Central journal article supplement (PMC11557889; doi:10.1038/s41467-024-53727-y), 2024-11-12
Supplement: 41467_2024_53727_MOESM1_ESM.pdf [file 41467_2024_53727_MOESM1_ESM.pdf]

## Supplementary Material

### Immune Assays Team

| Affiliation                                                                                                                                                                                                                                                                                                                      | Team Members                                                                                                                                                                                                                                                                                                                                                                          |
|----------------------------------------------------------------------------------------------------------------------------------------------------------------------------------------------------------------------------------------------------------------------------------------------------------------------------------|---------------------------------------------------------------------------------------------------------------------------------------------------------------------------------------------------------------------------------------------------------------------------------------------------------------------------------------------------------------------------------------|
| Biomedical Advanced Research and Development Authority (BARDA), Washington, DC                                                                                                                                                                                                                                                   | Oleg Borisov, Flora Castellino, Brett Chromy, Mark Delvecchio, Ruben O. Donis, Tremel Faison, Corey Hoffman, Christopher Houchens, Tom Hu, Pennie Hylton, Lakshmi Jayashankar, Aparna Kolhekar, James Little, Karen Martins, Jeanne Novak, Azhar Ravji, Carol Sabourin, Evan Sturtevant, Kimberly Taylor, Xiaomi Tong, John Treanor, Danielle Turley, Leah Watson, Daniel Wolfe       |
| Boston Consulting Group, Boston, MA                                                                                                                                                                                                                                                                                              | Gian King, Andrew Li, Najaf Shah, Smruthi Suryaprakash, Jue Xiang Wang                                                                                                                                                                                                                                                                                                                |
| Division of AIDS, NIAID, NIH, Bethesda, MD                                                                                                                                                                                                                                                                                       | Patricia D'Souza                                                                                                                                                                                                                                                                                                                                                                      |
| Division of MID (Microbiology and Infectious Diseases), NIAID, NIH, Bethesda, MD                                                                                                                                                                                                                                                 | Janie Russell                                                                                                                                                                                                                                                                                                                                                                         |
| Duke University, Durham, NC                                                                                                                                                                                                                                                                                                      | David Beaumont, Kendall Bradley, Jiayu Chen, Xiaoju Daniell, Thomas Denny, Elizabeth Domin, Amanda Eaton, Kelsey Engel, Wenhong Feng, Juanfei Gao, Hongmei Gao, Kelli Greene, Sarah Hiles, Leihua Liu, Kristy Long, Kellen Lund, Charlene McDanal, David C. Montefiori, Marcella Sarzotti-Kelsoe, Francesca Suman, Haili Tang, Jin Tong, Olivia Widman                                |
| LabCorp-Monogram Biosciences, South San Francisco, CA, USA                                                                                                                                                                                                                                                                       | Christos J. Petropoulos, Terri Wrin                                                                                                                                                                                                                                                                                                                                                   |
| The Tauri Group, an LMI company - Contract Support for U.S. Department of Defense (DOD) Joint Program Executive Office for Chemical, Biological, Radiological and Nuclear Defense (JPEO-CBRND) Joint Project Manager for Chemical, Biological, Radiological, and Nuclear Medical (JPM CBRN Medical), Fort Detrick, Maryland, USA | Christopher S. Badorrek, Gregory E. Rutkowski                                                                                                                                                                                                                                                                                                                                         |
| Vaccine Research Center, NIAID, NIH, Bethesda, MD                                                                                                                                                                                                                                                                                | Obrimpong Amoah-Awua, Manjula Basappa, Robin Carroll, Britta Flach, Suprabhath Gajjala, Nazaire Jean-Baptiste, Richard A. Koup, Bob C. Lin, Adrian McDermott, Christopher Moore, Mursal Naisan, Muhammed Naqvi, Sandeep Narpala, Sarah O'Connell, Clare Whittaker, Weiwei Wu, Allen Mueller, Martin Apgar, Tommy Bruington, Joe Stashick, Leo Serebryanny, Mike Castro, Jennifer Wang |

## Coronavirus Vaccine Prevention Network (CoVPN)/ENSEMBLE Team

| Study Group Member        | Affiliation                                                                                 | Location                |
|---------------------------|---------------------------------------------------------------------------------------------|-------------------------|
| Jerald Sadoff, M.D.       | Janssen Vaccines and Prevention                                                             | Leiden, the Netherlands |
| Glenda Gray, M.B., B.Ch.  | South African Research Council                                                              | Cape Town, South Africa |
| An Vandebosch, Ph.D.      | Janssen Research and Development                                                            | Beerse, Belgium         |
| Vicky Cárdenas, Ph.D.     | Janssen Research and Development                                                            | Spring House, PA, USA   |
| Georgi Shukarev, M.D.     | Janssen Vaccines and Prevention                                                             | Leiden, the Netherlands |
| Beatriz Grinsztejn, M.D.  | Evandro Chagas National Institute of Infectious Diseases–Fiocruz                            | Rio de Janeiro, Brazil  |
| Paul A. Goepfert, M.D.    | University of Alabama at Birmingham                                                         | Birmingham, AL, USA     |
| Carla Truyers, Ph.D.      | Janssen Research and Development                                                            | Beerse, Belgium         |
| Hein Fennema, Ph.D.       | Janssen Research and Development                                                            | Beerse, Belgium         |
| Bart Spiessens, Ph.D.     | Janssen Research and Development                                                            | Beerse, Belgium         |
| Kim Offergeld, M.Sc.      | Janssen Research and Development                                                            | Beerse, Belgium         |
| Gert Scheper, Ph.D.       | Janssen Vaccines and Prevention                                                             | Leiden, the Netherlands |
| Kimberly L. Taylor, Ph.D. | National Institute of Allergy and Infectious Diseases                                       | Rockville, MD, USA      |
| Merlin L. Robb, M.D.      | Walter Reed Army Institute of Research                                                      | Silver Spring, MD, USA  |
| John Treanor, M.D.        | Biomedical Advanced Research and Development Authority                                      | Washington, DC, USA     |
| Dan H. Barouch, M.D.      | Center for Virology and Vaccine Research, Beth Israel Deaconess Medical Center              | Boston, MA, USA         |
| Jeffrey Stoddard, M.D.    | Janssen Research and Development                                                            | Raritan, NJ, USA        |
| Martin F. Ryser, M.D.     | Janssen Research and Development                                                            | Beerse, Belgium         |
| Mary A. Marovich, M.D.    | National Institute of Allergy and Infectious Diseases                                       | Rockville, MD, USA      |
| Kathleen M. Neuzil, M.D.  | Center for Vaccine Development and Global Health, University of Maryland School of Medicine | Baltimore, MD, USA      |
| Lawrence Corey, M.D.      | Vaccine and Infectious Disease Division, Fred Hutchinson Cancer Research Center             | Seattle, WA, USA        |
| Nancy Cauwenberghs, Ph.D. | Janssen Research and Development                                                            | Beerse, Belgium         |
| Tamzin Tanner, Ph.D.      | Janssen Research and Development                                                            | Beerse, Belgium         |
| Karin Hardt, Ph.D.        | Janssen Research and Development                                                            | Beerse, Belgium         |

|                                    |                                                                                                 |                                                                      |
|------------------------------------|-------------------------------------------------------------------------------------------------|----------------------------------------------------------------------|
| Javier Ruiz-Guiñazú, M.D.          | Janssen Research and Development                                                                | Beerse, Belgium                                                      |
| Mathieu Le Gars, Ph.D.             | Janssen Vaccines and Prevention                                                                 | Leiden, the Netherlands                                              |
| Hanneke Schuitemaker, Ph.D.        | Janssen Vaccines and Prevention                                                                 | Leiden, the Netherlands                                              |
| Johan Van Hoof, M.D.               | Janssen Vaccines and Prevention                                                                 | Leiden, the Netherlands                                              |
| Frank Struyf, M.D.                 | Janssen Research and Development                                                                | Beerse, Belgium                                                      |
| Macaya Douoguih, M.D.              | Janssen Vaccines and Prevention                                                                 | Leiden, the Netherlands                                              |
| Richard Gorman, MD                 | Biomedical Advanced Research and Development Authority (BARDA)                                  | Washington, DC, USA                                                  |
| Carmen A. Paez, MD, MBA            | Fred Hutchinson Cancer Research Center                                                          | Seattle, WA, USA                                                     |
| Edith Swann, PhD                   | National Institute of Allergy and Infectious Diseases (NIAID)                                   | Rockville, MD, USA                                                   |
| James Kublin, MD, MPH              | Fred Hutchinson Cancer Research Center                                                          | Seattle, WA, USA                                                     |
| Simbarashe G. Takuva, MBChB, MSc   | Fred Hutchinson Cancer Research Center; University of the Witwatersrand; University of Pretoria | Seattle, WA, USA; Johannesburg, South Africa; Pretoria, South Africa |
| Alex Greninger, MD, PhD, MS, MPhil | University of Washington; Fred Hutchinson Cancer Research Center                                | Seattle, WA, USA                                                     |
| Pavitra Roychoudhury, PhD          | University of Washington; Fred Hutchinson Cancer Research Center                                | Seattle, WA, USA                                                     |
| Robert W. Coombs, MD, PhD          | University of Washington                                                                        | Seattle, WA, USA                                                     |
| Keith R. Jerome, MD, PhD           | University of Washington; Fred Hutchinson Cancer Research Center                                | Seattle, WA, USA                                                     |
| Flora Castellino, MD               | Biomedical Advanced Research and Development Authority (BARDA)                                  | Washington, DC, USA                                                  |
| Xiaomi Tong, PhD                   | Biomedical Advanced Research and Development Authority (BARDA)                                  | Washington, DC, USA                                                  |
| Corrina Pavetto, MS, RAC           | Biomedical Advanced Research and Development Authority (BARDA)                                  | Washington, DC, USA                                                  |
| Teletha Gipson, PhD, MS            | Biomedical Advanced Research and Development Authority (BARDA)                                  | Washington, DC, USA                                                  |
| Tina Tong, DrPH(c), MS, RAC(US)    | National Institute of Allergy and Infectious Diseases (NIH/NIAID)                               | Rockville, MD, USA                                                   |
| Marina Lee, PhD                    | National Institute of Allergy and Infectious Diseases (NIH/NIAID)                               | Rockville, MD, USA                                                   |
| James Zhou, PhD, MS                | Biomedical Advanced Research and Development Authority (BARDA)                                  | Washington, DC, USA                                                  |
| Michael Fay, PhD                   | National Institute of Allergy and Infectious Diseases (NIH/NIAID)                               | Rockville, MD, USA                                                   |

|                            |                                         |                         |
|----------------------------|-----------------------------------------|-------------------------|
| Kelly McQuarrie, BSN       | Janssen Research & Development          | Horsham, PA, USA        |
| Chimeremma Nnadi, MD, PhD  | Janssen Pharmaceuticals                 | Titusville, NJ, USA     |
| Obiageli Sogbetun, MD, MPH | Janssen Infectious Disease and Vaccines | Titusville, NJ, USA     |
| Nina Ahmad, MD             | Janssen Pharmaceuticals                 | Titusville, NJ, USA     |
| Ian De Proost, PhD         | Johnson & Johnson                       | Beerse, Belgium         |
| Cyrus Hoseyni, PhD         | Janssen Research & Development          | Spring House, PA, USA   |
| Paul Coplan, ScD, MS, MBA  | Johnson & Johnson Epidemiology          | New Brunswick, NJ, USA  |
| Najat Khan, PhD            | Janssen Research & Development          | New Brunswick, NJ, USA  |
| Peter Ronco, BA            | Janssen Research & Development          | Raritan, NJ, USA        |
| Dawn Furey, BA             | Janssen Research & Development          | Titusville, NJ, USA     |
| Jodi Meck, MHA             | Janssen Research & Development          | Titusville, NJ, USA     |
| Johan Vingerhoets, PhD     | Janssen Pharmaceutica NV                | Beerse, Belgium         |
| Boerries Brandenburg, PhD  | Janssen Vaccines & Prevention B.V.      | Leiden, The Netherlands |
| Jerome Custers, PhD        | Janssen Vaccines & Prevention B.V.      | Leiden, The Netherlands |
| Jenny Hendriks, PhD        | Janssen Vaccines & Prevention B.V.      | Leiden, The Netherlands |
| Jarek Juraszek, PhD        | Janssen Vaccines & Prevention B.V.      | Leiden, The Netherlands |
| Anne Marit de Groot, PhD   | Janssen Vaccines & Prevention B.V.      | Leiden, The Netherlands |
| Griet Van Roey, PhD        | Janssen Vaccines & Prevention B.V.      | Leiden, The Netherlands |
| Dirk Heerwegh, PhD         | Janssen Research & Development; Janssen | Beerse, Belgium         |
| Ilse Van Dromme, PhD       | Johnson & Johnson                       | Beerse, Belgium         |

## CoVPN/ENSEMBLE Team, Cont'd: Participating Investigators

The following Principal Investigators participated in the ENSEMBLE study:

| Name                      | Institute                                                                              | Location                   |
|---------------------------|----------------------------------------------------------------------------------------|----------------------------|
| Aberg, Judith             | Icahn School of Medicine at Mount Sinai                                                | New York, NY, USA          |
| Adams, Mark               | Central Kentucky Research Associates, Inc.                                             | Lexington, KY, USA         |
| Adams, Michael            | Synexus Clinical Research US, Inc.                                                     | Murray, UT, USA            |
| Aguayo, Samuel            | VA Medical Center                                                                      | Phoenix, AZ, USA           |
| Ahsan, Habibul            | The University of Chicago Medicine                                                     | Chicago, IL, USA           |
| Aizenberg, Diego          | Centro Médico Viamonte SRL                                                             | Buenos Aires, Argentina    |
| Alonto, Augusto           | Jesse Brown VAMC Department of Surgery                                                 | Chicago, IL, USA           |
| Alzogaray, Maria Fernanda | Instituto Médico Platense                                                              | Buenos Aires, Argentina    |
| Anderson, Evan            | Emory University School of Medicine                                                    | Atlanta, GA, USA           |
| Andrade Pinto, Jorge      | Hospital das Clínicas da Universidade Federal de Minas Gerais                          | Belo Horizonte, Brazil     |
| Arns da Cunha, Clóvis     | Hospital Nossa Senhora das Graças                                                      | Paraná, Brazil             |
| Avelino Silva, Vivian     | Hospital das Clínicas da Faculdade de Medicina da USP                                  | São Paulo, Brazil          |
| Badal-Faesen, Sharlaa     | University of Witwatersrand – Helen Joseph Hospital – Themba Lethu HIV Research Centre | Johannesburg, South Africa |
| Baden, Lindsey            | Brigham and Women's Hospital, Inc.                                                     | Boston, MA, USA            |
| Barnabas, Shaun           | Family Clinical Research Unit FAM-CRU                                                  | Western Cape, South Africa |
| Bedimo, Roger             | AIDS Arms Incorporated Trinity Health and Wellness Center                              | Dallas, TX, USA            |
| Bekker, Linda-Gail        | Desmond Tutu HIV Centre, University of Cape Town                                       | Cape Town, South Africa    |
| Berhe, Mezgebe            | North Texas Infectious Diseases Consultants                                            | Dallas, TX, USA            |
| Bessesen, Mary            | Rocky Mountain Regional VA Medical Center                                              | Aurora, CO, USA            |
| Blaser, Martin J          | Rutgers Robert Wood Johnson Medical School                                             | New Brunswick, NJ, USA     |
| Bonvehi, Pablo Eduardo    | CEMIC Saavedra                                                                         | Buenos Aires, Argentina    |
| Borger, Judith            | Carolina Institute for Clinical Research                                               | Fayetteville, NC, USA      |

|                                    |                                                                        |                          |
|------------------------------------|------------------------------------------------------------------------|--------------------------|
| Brites Alves, Carlos Roberto       | Fundação Bahiana de Infectologia                                       | Bahia, Brazil            |
| Brown, Sheldon                     | Bronx Veterans Affairs Medical Center                                  | Bronx, NY, USA           |
| Brumskine, William                 | The Aurum Institute Rustenburg Clinical Research Centre                | Rustenburg, South Africa |
| Brune, Daniel                      | Optimal Research, LLC                                                  | Peoria, IL, USA          |
| Buynak, Robert                     | Buynak Clinical Research                                               | Valparaiso, IN, USA      |
| Cabrera May, Carlos Antonio        | Unidad de Atención Médica e Investigación en Salud (UNAMIS)            | Yucatán, Mexico          |
| Cadena Bonfanti, Andres Angelo     | Clínica de la Costa                                                    | Barranquilla, Colombia   |
| Cahn, Pedro                        | Fundación Huésped                                                      | Buenos Aires, Argentina  |
| Carson, Jeffrey L.                 | Rutgers Robert Wood Johnson Medical School                             | New Brunswick, NJ, USA   |
| Casapia Morales, Wilfredo Martin   | Asociación Civil Selva Amazónica (ACSA)                                | Loreto, Peru             |
| Cassetti, Lidia Isabel             | Helios Salud S.A.                                                      | Buenos Aires, Argentina  |
| Castex, Julie                      | Ochsner Medical Center                                                 | New Orleans, LA, USA     |
| Chu, Laurence                      | Benchmark Research                                                     | Austin, TX, USA          |
| Cotugno, Michael                   | Benchmark Research                                                     | Metairie, LA, USA        |
| Creech, Clarence                   | Vanderbilt University Medical Center                                   | Nashville, TN, USA       |
| Crofoot, Gordon                    | CrofootMD Clinic and Research Center                                   | Houston, TX, USA         |
| Curtis, Brian                      | Corvallis Clinic PC                                                    | Corvallis, OR USA        |
| da Silva Pilotto, José Henrique    | Hospital Geral de Nova Igauçu                                          | Rio de Janeiro, Brazil   |
| Dal Ben Corradi, Mirian de Freitas | Hospital Sírio-Libanês                                                 | São Paulo, Brazil        |
| Dal Pizzol, Felipe                 | Hospital São José                                                      | Santa Catarina, Brazil   |
| Davis, Matthew                     | Rochester Clinical Research, Inc.                                      | Rochester, NY, USA       |
| De Carvalho Santana, Rodrigo       | Hospital das Clínicas da Faculdade de Medicina de Ribeirão Preto daUSP | São Paulo, Brazil        |
| de Faria Freire, Antônio Tarcísio  | Santa Casa de Misericórdia de Belo Horizonte                           | Belo Horizonte, Brazil   |
| DeJesus, Edwin                     | Orlando Immunology Center                                              | Orlando, FL, USA         |
| Delafontaine, Patrice              | New Orleans Adolescent Trials Unit CRS                                 | New Orleans, LA, USA     |
| Delano Bronstein, Marcello         | CPQuali Pesquisa Clínica LTDA ME                                       | São Paulo, Brazil        |
| Dell'Italia, Louis                 | University of Alabama at Birmingham                                    | Birmingham, AL, USA      |

|                               |                                                                                  |                            |
|-------------------------------|----------------------------------------------------------------------------------|----------------------------|
| Deluca, Mercedes              | Clinical Trials Division – Stamboulia Servicios de Salud                         | Buenos Aires, Argentina    |
| Denham, Douglas               | Clinical Trials of Texas, Inc.                                                   | San Antonio, TX, USA       |
| Diacon, Andreas               | TASK Central                                                                     | Western Cape, South Africa |
| Dubula, Thozama               | Nelson Mandela Academic Clinical Research Unit (NeMACRU)                         | Mthatha, South Africa      |
| Eder, Frank                   | Meridian Clinical Research, LLC                                                  | Endwell, NY, USA           |
| Edupuganti, Srilatha          | The Hope Clinic at Emory University                                              | Decatur, GA, USA           |
| Ervin, John                   | The Center for Pharmaceutical Research                                           | Kansas City, MO, USA       |
| Esteves Coelho, Lara          | FIO CRUZ – Fundação Oswaldo Cruz – Inst de Pesquisa Clínica<br>Evandro Chagas    | Rio de Janeiro, Brazil     |
| Eudes Leal, Fabio             | Universidade Municipal de São Caetano do Sul                                     | São Paulo, Brazil          |
| Fairlie, Lee                  | Shandukani Research Centre                                                       | Gauteng, South Africa      |
| Fierro, Carlos                | Johnson County Clin-Trials                                                       | Lenexa, KS, USA            |
| Fogarty, Charles              | Spartanburg Medical Research                                                     | Spartanburg, SC, USA       |
| Fragoso, Veronica             | Texas Center for Drug Development, Inc.                                          | Houston, TX, USA           |
| Frank, Ian                    | University of Pennsylvania                                                       | Philadelphia, PA, USA      |
| Frey, Sharon                  | Saint Louis University                                                           | St Louis, MO, USA          |
| Gallardo Cartagena, Jorge     | Centro de Investigaciones Tecnológicas, Biomédicas y<br>Medioambientales (CITBM) | Lima, Peru                 |
| Gamarra Ayarza, Cesar Augusto | Centro de Investigaciones Médicas                                                | Callao, Peru               |
| Garcia Diaz, Julia            | Ochsner Medical Center                                                           | New Orleans, LA, USA       |
| Gaur, Aditya                  | St Jude Children’s Research Hospital                                             | Memphis, TN, USA           |
| Gentile, Nina                 | Temple University Hospital                                                       | Philadelphia, PA, USA      |
| Gill, Katherine               | Masiphumelele Research Centre                                                    | Cape Town, South Africa    |
| Gonzalez, Alexander           | MedPlus Medicina Prepagada S.A.                                                  | Bogotá, Colombia           |
| Gottlieb, Robert              | Baylor Scott & White Research Institute                                          | Dallas, TX, USA            |
| Grant, Philip                 | Stanford University Medical Center                                               | Palo Alto, CA, USA         |
| Greenberg, Richard            | University of Kentucky                                                           | Lexington, KY, USA         |
| Greiwe, Cathy                 | Synexus Clinical Research US, Inc.                                               | Columbus, OH, USA          |

|                               |                                                                  |                             |
|-------------------------------|------------------------------------------------------------------|-----------------------------|
| Guedes Barbosa, Luiz Sergio   | Oncovida – Centro de Onco-Hematologia de Mato Grosso             | Mato Grosso, Brazil         |
| Han-Conrad, Laurie            | WR-MCCR, LCC                                                     | San Diego, CA, USA          |
| Hidalgo Vidal, Jose Alfredo   | Asociación Civil Vía Libre                                       | Lima, Peru                  |
| Higuera Cobos, Juan Diego     | Fundación Oftalmológica de Santander – FOSCAL                    | Santander, Colombia         |
| Hong, Matthew                 | Wake Research Associates                                         | Raleigh, NJ, USA            |
| Innes, James Craig            | The Aurum Institute Klerksdorp Clinical Research Centre          | Klerksdorp, South Africa    |
| Jackson, Lisa                 | Kaiser Permanente Washington Health Research Institute           | Seattle, WA, USA            |
| Jackson-Booth, Peta-Gay       | Optimal Research, LLC                                            | Rockville, MD, USA          |
| Jaller Raad, Juan Jose        | Centro de Reumatología y Ortopedia                               | Barranquilla, Colombia      |
| Jayaweera, Dushyantha         | University of Miami – Miller School of Medicine                  | Miami, FL, USA              |
| Jennings, William             | Synexus Clinical Research US, Inc.                               | San Antonio, TX, USA        |
| João Filho, Esaú Custódio     | Hospital Federal dos Servidores do Estado                        | Rio de Janeiro, Brazil      |
| Kassim, Sheetal               | Desmond Tutu HIV Foundation – University of Cape Town            | Cape Town, South Africa     |
| Kennelly, Christina           | Tryon Medical Partners                                           | Charlotte, NC, USA          |
| Khetan, Shishir               | Meridian Clinical Research, LLC                                  | Rockville, MD, USA          |
| Kilgore, Paul E.              | Henry Ford Health System                                         | Detroit, MI, USA            |
| Kim, Kenneth                  | Ark Clinical Research                                            | Long Beach, CA, USA         |
| Kirby, William                | Synexus Clinical Research US, Inc.                               | Birmingham, AL, USA         |
| Kopp, James                   | Synexus Clinical Research US, Inc.                               | Anderson, SC, USA           |
| Kotze, Philip                 | Qhakaza Mbokodo Research Clinic                                  | KwaZulu-Natal, South Africa |
| Kotze, Sheena                 | Stanza Clinical Research Centre: Mamelodi                        | Gauteng, South Africa       |
| Kriesel, John                 | University of Utah                                               | Salt Lake City, UT, USA     |
| Kutner, Mark                  | Suncoast Research Group                                          | Miami, FL, USA              |
| Lacerda Nogueira, Maurício    | Fundação Faculdade Regional de Medicina de São José do Rio Preto | São Paulo, Brazil           |
| Laher, Fatima                 | Perinatal HIV Research Unit, Chris Hani Baragwanath Hospital     | Gauteng, South Africa       |
| Lama Valdivia, Javier Ricardo | Asociación Civil Impacta Salud y Educación – Barranco            | Lima, Peru                  |
| Lazarus, Erica                | Perinatal HIV Research Unit (PHRU), Kliptown                     | Soweto, South Africa        |



|                              |                                                                         |                                  |
|------------------------------|-------------------------------------------------------------------------|----------------------------------|
| Lazcano Ponce, Eduardo Cesar | Instituto Nacional de Salud Pública                                     | Morelos, Mexico                  |
| Leibman, Daniel              | VA Medical Center                                                       | Columbia, SC, USA                |
| Levin, Michael               | Clinical Research Center of Nevada                                      | Las Vegas, NV, USA               |
| Levin, Myron                 | Children's Hospital Colorado                                            | Aurora, CO, USA                  |
| Little, Susan                | UCSD AntiViral Research Center (AVRC)                                   | San Diego, CA, USA               |
| Lombaard, Johannes           | Joshua Research                                                         | Bloemfontein, South Africa       |
| Lopez Medina, Eduardo        | Centro de Investigaciones Clínicas S.A.S.                               | Cali, Colombia                   |
| Losso, Marcelo               | Hospital J.M. Ramos Mejía                                               | Buenos Aires, Argentina          |
| Luabeya, Angelique           | SATVI, Brewelskloof Hospital                                            | Western Cape, South Africa       |
| Lucksinger, Gregg            | Clinical Research Institute of Southern Oregon, P.C.                    | Medford, OR, USA                 |
| Lugogo, Njira                | University of Michigan Neurosurgery A. Alfred Taubman Health CareCenter | Ann Arbor, MI, USA               |
| Luz, Kleber Giovanni         | Centro de Estudos e Pesquisas em Moléstias Infecciosas                  | Rio Grande do Norte, Brazil      |
| Maboa, Rebone                | Ndlovu Elandsdoorn Site                                                 | Limpopo, Dennilton, South Africa |
| Macareno Arroyo, Hugo Andres | Hospital Universidad del Norte                                          | Barranquilla, Colombia           |
| Makhaza, Disebo              | CAPRISA Vulindlela Clinic                                               | KwaZulu-Natal, South Africa      |
| Malahleha, Mookho            | Setshaba Research Centre                                                | Soshanguve, South Africa         |
| Malan, Daniel                | PHOENIX Pharma (Pty) Ltd.                                               | Eastern Cape, South Africa       |
| Mamba, Musawenkosi           | CRISMO Bertha Gxowa Research Centre                                     | Gauteng, South Africa            |
| Manning, Mary Beth           | Rapid Medical Research                                                  | Cleveland, OH, USA               |
| Martin, Judith               | University of Pittsburgh                                                | Pittsburgh, PA, USA              |
| Mauricio da Silva, Cesar     | Faculdade de Medicina Barretos – FACISB                                 | Barretos, SP, Brazil             |
| McGettigan, John             | Quality of Life Medical & Research Center, LLC                          | Tucson, AZ, USA                  |
| Medrano Allende, Juan        | Clínica y Maternidad Suizo Argentina                                    | Buenos Aires, Argentina          |
| Mena, Leandro                | University of Mississippi Medical Center                                | Jackson, MS, USA                 |
| Messer, William              | Oregon Health & Science University                                      | Portland, OR, USA                |
| Middleton, Randle            | Optimal Research, LLC                                                   | Huntsville, AL, USA              |

|                                   |                                                                          |                             |
|-----------------------------------|--------------------------------------------------------------------------|-----------------------------|
| Mills, Anthony                    | Anthony Mills Medical, Inc.                                              | Los Angeles, CA, USA        |
| Mills, Richard                    | PMG Research of Charleston, LLC                                          | Mount Pleasant, SC, USA     |
| Mngadi, Kathryn                   | The Aurum Institute: Tembisa – Clinic 4                                  | Tembisa, South Africa       |
| Moanna, Abeer                     | VA Medical Center – Atlanta                                              | Decatur, GA, USA            |
| Mofsen, Ricky                     | Massachusetts General Hospital                                           | Boston, MA, USA             |
| Moncada Vilela, Zandra            | Hospital Nacional Arzobispo Loayza                                       | Lima, Peru                  |
| Montaña, Oscar Romano             | DIM Clínica Privada                                                      | Buenos Aires, Argentina     |
| Moreno Hoyos Abril, Juan          | Hospital Universitario de Nuevo León ‘Dr. José Eleuterio González’       | Nuevo León, Mexico          |
| Morse, Caryn                      | Wake Forest Baptist Medical Center                                       | Winston-Salem, NC, USA      |
| Muñoz Reyes, Manuel               | Hospital Dr. Hernán Henríquez Aravena                                    | Araucanía, Chile            |
| Murray, Linda                     | Synexus Clinical Research US, Inc.                                       | Pinellas Park, FL, USA      |
| Naicker, Nivashnee                | Centre for the AIDS Programme of Research in South Africa                | KwaZulu-Natal, South Africa |
| Naicker, Vimla                    | South Africa Medical Research Council                                    | KwaZulu-Natal, South Africa |
| Naidoo, Logashvari                | South African Medical Research Council Chatsworth Clinical Research Site | KwaZulu-Natal, South Africa |
| Nchabeleng, Maphoshane            | MeCRU Clinical Research Unit                                             | Gauteng, South Africa       |
| Newman Lobato Souza, Tamara       | Instituto de Infectologia Emilio Ribas                                   | São Paulo, Brazil           |
| Novak, Richard                    | University of Illinois at Chicago                                        | Chicago, IL, USA            |
| Nugent, Paul                      | Synexus Clinical Research US, Inc.                                       | Cincinnati, OH, USA         |
| O’Ryan Gallardo, Miguel Luis      | Facultad de Medicina, Universidad de Chile                               | Santiago, Chile             |
| Oyanguren Miranda, Martin         | Hospital Nacional Edgardo Rebagliati Martins                             | Lima, Peru                  |
| Padala, Kalpana                   | Central Arkansas Veterans Healthcare System                              | Little Rock, AR, USA        |
| Panettieri, Jr., Reynold A.       | Rutgers Robert Wood Johnson Medical School                               | New Brunswick, NJ, USA      |
| Panjwani, Sameer G.               | Rush University Medical Center                                           | Chicago, IL, USA            |
| Patelli Juliani Souza Lima, Maria | Hospital e Maternidade Celso Pierro                                      | São Paulo, Brazil           |
| Pelkey, Leslie                    | Cherry Street Services, Inc.                                             | Grand Rapids, MI, USA       |
| Petrick, Friedrich                | Mzansi Ethical Research Centre                                           | Middelburg, South Africa    |
| Pounds, Kevin                     | Synexus Clinical Research US, Inc.                                       | Tucson, AZ, USA             |

|                                  |                                                         |                           |
|----------------------------------|---------------------------------------------------------|---------------------------|
| Powell, Richard                  | New Horizons Clinical Research                          | Cincinnati, OH, USA       |
| Pragalos, Antoinette             | CTI Clinical Trial and Consulting Services              | Cincinnati, OH, USA       |
| Pratley, Richard E.              | AdventHealth Orlando                                    | Orlando, FL, USA          |
| Presti, Rachel                   | Washington University School of Medicine                | St Louis, MO, USA         |
| Ramalho Madruga, José Valdez     | Centro de Referência e Treinamento DST/AIDS             | São Paulo, Brazil         |
| Ramesh, Mayur                    | Henry Ford Health System                                | Detroit, MI, USA          |
| Ramirez Sanchez, Isabel Cristina | Hospital Pablo Tobón Uribe                              | Antioquia, Colombia       |
| Ramirez, Julio                   | University of Louisville                                | Louisville, KY, USA       |
| Rankin, Bruce                    | Avail Clinical Research, LLC                            | DeLand, FL, USA           |
| Restrepo, Jaime                  | Fundación Centro de Investigación Clínica (CIC)         | Medellín, Colombia        |
| Reynales Londono, Humberto       | Centro de Atención e Investigación Médica S.A. – CAIMED | Bogotá, Colombia          |
| Reynolds, Michele                | Synexus Clinical Research US, Inc.                      | Dallas, TX, USA           |
| Rhame, Frank                     | Abbott Northwestern Hospital Clinic                     | Minneapolis, MN, USA      |
| Rhee, Margaret                   | Synexus Clinical Research US, Inc.                      | Akron, OH, USA            |
| Riddle, Mark                     | VA Sierra Nevada Health Care System                     | Reno, NV, USA             |
| Riegel Santos, Breno             | Hospital Nossa Senhora da Conceição (HNSC)              | Rio Grande do Sul, Brazil |
| Riffer, Ernie                    | Central Phoenix Medical Clinic                          | Phoenix, AZ, USA          |
| Rizzardi, Barbara                | Advanced Clinical Research                              | West Jordan, UT, USA      |
| Rosso, Fernando                  | Fundación Valle del Lili                                | Valle del Cauca, Colombia |
| Saavedra, Carla                  | Bioclinica Santiago Bulnes                              | Santiago, Chile           |
| Safirstein, Beth                 | MD Clinical                                             | Hallandale Beach, FL, USA |
| Scapellato, Pablo                | CEMEDIC                                                 | Buenos Aires, Argentina   |
| Scheinberg, Phillip              | Real e Benemérita Associação Portuguesa de Beneficência | São Paulo, Brazil         |
| Schwartz, Howard                 | Research Centers of America, LLC                        | Hollywood, FL, USA        |
| Sedillo, David J.                | Rush University Medical Center                          | Chicago, IL, USA          |
| Servilla, Karen                  | Raymond G. Murphy VA Medical Center                     | Albuquerque, NM, USA      |
| Shah, Raj                        | Rush University Medical Center                          | Chicago, IL, USA          |

|                                     |                                                                               |                             |
|-------------------------------------|-------------------------------------------------------------------------------|-----------------------------|
| Siegel, Amy                         | MediSync Clinical Research                                                    | Petal, MS, USA              |
| Silva Orellana, Rafael              | Clínica del Maule                                                             | Talca, Chile                |
| Silva, Federico                     | Fundación Cardiovascular de Colombia – Instituto del Corazón<br>Floridablanca | Floridablanca, Colombia     |
| Smith, Steven R.                    | AdventHealth Orlando                                                          | Orlando, FL, USA            |
| Spooner, Elizabeth                  | South Africa Medical Research Council                                         | KwaZulu-Natal, South Africa |
| Sprinz, Eduardo                     | Hospital de Clínicas de Porto Alegre                                          | Porto Alegre, Brazil        |
| Sriram, Peruvemba                   | North Florida/South Georgia Veterans Health System                            | Gainesville, FL, USA        |
| Strout, Cynthia                     | Coastal Carolina Research Center, Inc.                                        | Mount Pleasant, SC, USA     |
| Swiatlo, Edwin                      | Southeast Louisiana Veterans Health Care System                               | New Orleans, LA, USA        |
| Taiwo, Babafemi                     | Northwestern University                                                       | Evanston, IL, USA           |
| Talwani, Rohit                      | Baltimore VA Medical Center                                                   | Baltimore, MD, USA          |
| Tavares Russo, Luís Augusto         | Instituto Brasil de Pesquisa Clínica                                          | Rio de Janeiro, Brazil      |
| Terront Lozano, Monica<br>Alexandra | Solano y Terront Servicios Médicos Ltda                                       | Bogotá, Colombia            |
| Tharenos, Leslie                    | Synexus Clinical Research US, Inc.                                            | St Louis, MO, USA           |
| Tien, Phyllis                       | VA Medical Center                                                             | San Francisco, CA, USA      |
| Tieu, Hong Van                      | New York Blood Center                                                         | New York, NY, USA           |
| Toney, John                         | James A. Haley VA Hospital GNS                                                | Tampa, FL, USA              |
| Urbach, Dorothea                    | Synexus Helderberg Clinical Research Centre                                   | Western Cape, South Africa  |
| Vachris, Timothy                    | Optimal Research, LLC                                                         | Austin, TX, USA             |
| Valencia, Javier                    | Asociación Civil Impacta Salud y Educación – San Miguel CRS                   | Lima, Peru                  |
| van Nieuwenhuizen, Elane            | Synexus Watermeyer                                                            | Gauteng, South Africa       |
| Vannucci Lomonte, Andrea            | CEPIC – Centro Paulista de Investigação Clínica                               | São Paulo, Brazil           |
| Vasconcellos, Eduardo               | Instituto de Pesquisas Clínicas                                               | Distrito Federal, Brazil    |
| Velez, Ivan Dario                   | Programa de Estudio y Control de Enfermedades Tropicales                      | Medellín, Colombia          |
| Ward, Amy                           | University of Cape Town IDM/CIDRI Research Site                               | Cape Town, South Africa     |
| Wells, Cassia                       | Harlem Hospital Center                                                        | New York, NY, USA           |

|                       |                                    |                         |
|-----------------------|------------------------------------|-------------------------|
| White, Judith         | Synexus Clinical Research US, Inc. | Orlando, FL, USA        |
| Winkle, Peter         | Anaheim Clinical Trials, LLC       | Anaheim, CA, USA        |
| Woods, Christopher    | Durham VAMC                        | Raleigh, NC, USA        |
| Zaidman, Cesar Javier | CIPREC                             | Buenos Aires, Argentina |

**United States Government (USG)/Coronavirus Prevention Network (CoVPN) Biostatistics Team**

| <b>Affiliation</b>                                                                                                 | <b>Team Members</b>                                                                                                                                                                                                                                                             |
|--------------------------------------------------------------------------------------------------------------------|---------------------------------------------------------------------------------------------------------------------------------------------------------------------------------------------------------------------------------------------------------------------------------|
| Biomedical Advanced Research and Development Authority (BARDA), Washington, DC                                     | Di Lu, James Zhou                                                                                                                                                                                                                                                               |
| Department of Biostatistics and Bioinformatics, Rollins School of Public Health, Emory University                  | David Benkeser, Sohail Nizam                                                                                                                                                                                                                                                    |
| Vaccine and Infectious Disease Division, Fred Hutchinson Cancer Center, Seattle, WA                                | Jessica Andriesen, Bhavesh Borate, Lindsay N. Carpp, Andrew Fiore-Gartland, Youyi Fong*, Peter B. Gilbert*, Ying Huang*, Yunda Huang*, Ollivier Hyrien, Holly E. Janes*, Michal Juraska, Yiwen Lu, April K. Randhawa, Brian D. Williamson*, Lars W.P. van der Laan, Chenchen Yu |
| Biostatistics Research Branch, NIAID, NIH, Bethesda, MD                                                            | Michael P. Fay, Jonathan Fintzi, Dean Follmann, Martha Nason                                                                                                                                                                                                                    |
| Clinical Monitoring Research Program Directorate, Frederick National Laboratory for Cancer Research, Frederick, MD | Eric Chu                                                                                                                                                                                                                                                                        |
| Department of Biostatistics, University of Washington, Seattle, WA                                                 | Marco Carone, James Peng, Charlotte Talham                                                                                                                                                                                                                                      |
| Department of Statistics, University of Washington, Seattle, WA                                                    | Alex Luedtke                                                                                                                                                                                                                                                                    |
| Department of Biostatistics, Harvard T.H. Chan School of Public Health, Boston, MA                                 | Nima S. Hejazi                                                                                                                                                                                                                                                                  |
| Department of Population Health Sciences, NYU Grossman School of Medicine, New York, New York                      | Iván Díaz                                                                                                                                                                                                                                                                       |
| Department of Biostatistics and Bioinformatics, Duke University; Global Health Institute, Duke University          | Avi Kenny                                                                                                                                                                                                                                                                       |

\*YF, PBG, YiH, and HEJ are also affiliated with the Department of Biostatistics, University of Washington, Seattle, WA. PBG and YuH are also affiliated with the Public Health Sciences Division, Fred Hutchinson Cancer Research Center, Seattle, WA. YuH is also affiliated with the Department of Global Health, University of Washington, Seattle, WA. Brian D. Williamson is also affiliated with Kaiser Permanente Washington Health Research Institute, Seattle, Washington, USA.

## **Supplementary Results**

### *Latin America-specific results*

#### Latin America: Response rates and levels

Similar to the results of the pooled analysis, in the Latin America cohort D29 antibody marker response frequencies and levels were lower in severe-critical cases than in non-cases, and to a lesser extent also lower in moderate cases than in non-cases. There was quantifiable D29 nAb-ID50 titer in 25.7% of vaccine recipient severe-critical cases and 40.7% of moderate cases, compared to 52.7% of vaccine recipient non-cases (Supplementary Fig. 4C). The geometric mean nAb-ID50 titers in vaccine recipient severe-critical cases, moderate cases, and non-cases were 3.77 IU50/ml (95% CI: 2.74, 5.20), 5.28 IU50/ml (4.60, 6.05), and 7.03 IU50/ml (5.85, 8.44), respectively, yielding a severe-critical case:non-case ratio of 0.54 (0.37, 0.78) and a moderate case:non-case ratio of 0.75 (0.60, 0.94) (Table 1). For both binding antibody markers, D29 antibody marker response rates and levels were also lower in cases than in non-cases for both endpoints, but with case:non-case ratios closer to 1 (Supplementary Fig. 4A, 4B; Table 1).

#### Latin America: CoR analyses (univariate)

Similar to the results of the pooled analysis, each D29 marker correlated inversely with risk in the Latin America cohort, with the D29 antibody markers potentially even stronger inverse CoRs of severe-critical COVID-19. The HR (High vs. Low nAb-ID50 tertile) of severe-critical COVID-19 was 0.12 (0.02, 0.57; FWER-adjusted overall p=0.048) (Supplementary Fig. 12D) and for moderate COVID-19 it was 0.43 (0.23, 0.82; FWER-adjusted overall p=0.133) (Supplementary Fig. 13D). Similar inverse correlations, although less strong, were also seen for both binding antibody markers and both COVID-19 endpoints (Supplementary Figs. 12D, S13D).

For the D29 quantitative markers, results were similar, with the D29 antibody markers potentially even stronger inverse CoRs of severe-critical COVID-19. The HR of severe-critical COVID-19 per 10-fold increase in nAb-ID50 was 0.20 (0.05, 0.73; FWER-adjusted p=0.048) (Supplementary Table 12), and for moderate COVID-19 it was 0.53 (0.32, 0.90; FWER-adjusted p=0.085) (Supplementary Table 12). Similar inverse correlations, although less strong, were also seen for both binding antibody markers and both COVID-19 endpoints (Supplementary Table 12).

As seen in the geographic region-pooled analysis, estimated cumulative incidence of severe-critical COVID-19 through 220 days decreased across vaccine recipient subgroups defined by having D29 antibody marker levels *at* a specific value. Cumulative incidence (95% CI) of severe-critical COVID-19 at unquantifiable nAb-ID50 titer [ $< 4.8975$  International Units (IU)50/ml], just-quantifiable titer of 5.2 IU50/ml, and 90<sup>th</sup> percentile 28.5 IU50/ml was 1.2% (0.7%, 1.9%), 0.1% (0.01%, 1.5%), and 0.05% (0.01%, 0.4%), respectively. For moderate COVID-19, cumulative incidence at the same titer values of unquantifiable, 5.2 IU50/ml, and 28.5 IU50/ml was 8.0% (5.6%, 11.2%), 8.0% (4.4%, 11.2%), and 3.2% (1.4%, 6.8%), respectively (Supplementary Fig. 21C). A similar decrease in risk, albeit smaller in magnitude, was also seen with increasing concentration of each binding antibody marker (Supplementary Figs. 20A, 20B for severe-critical; 21A, 21B for moderate).

Vaccine recipients were also divided into subgroups defined by having D29 antibody marker levels *exceeding* a specific threshold, with application of nonparametric regression showing that the cumulative incidence of severe-critical COVID-19 (from 7 to 170 days post-D29) decreased with increasing antibody marker threshold. For vaccine recipients with any quantifiable nAb-ID50 ( $> 2.45$  IU50/ml, with LLOQ =

4.8975 IU50/ml), risk was 0.45% (95% CI: 0.28%, 0.62%) (Supplementary Fig. 28C). This decreased to 0.34% (0.16%, 0.53%) for vaccine recipients with nAb-ID50 > 7.0 IU50/ml, with additional nAb-ID50 threshold increases yielding no further reduction of risk. No severe-critical COVID-19 endpoints were observed at nAb-ID50 titer above 185 IU50/ml. For moderate COVID-19, however, no decrease was seen, with cumulative incidence 15.8% (15.0%, 16.4%) for vaccine recipients with any quantifiable nAb-ID50 and with additional nAb-ID50 threshold increases yielding no further reduction of risk (Supplementary Fig. 29C). Similar decreases in severe-critical COVID-19 risk with increasing antibody marker threshold were seen for the two bAb markers (Supplementary Figs. 28A, 28B), especially RBD IgG (Supplementary Fig. 28B). Unlike the nAb-ID50 results, moderate COVID-19 risk decreased with bAb marker threshold (Supplementary Fig. 29A, 29B), again especially for RBD IgG (Supplementary Fig. 29B).

#### Latin America: CoR analyses (multivariate)

Using a Cox proportional hazards model that included baseline risk score, D29 nAb-ID50, and D29 Spike IgG, the HR of severe-critical COVID-19 per 10-fold-increase in nAb-ID50 was 0.14 (0.03, 0.60;  $p=0.008$ ) compared to 1.92 (0.55, 6.75;  $p=0.310$ ) per 10-fold increase in Spike IgG (Supplementary Table 16), again providing evidence for D29 nAb-ID50 as a better independent correlate of severe-critical COVID-19 than D29 Spike IgG. A similar result was seen for moderate COVID-19, where the HR was 0.56 (0.30, 1.02;  $p=0.059$ ) and 0.92 (0.50, 1.70;  $p=0.796$ ) per 10-fold increase in D29 nAb-ID50 and in D29 Spike IgG, respectively (Supplementary Table 16).

#### Latin America: CoP analyses

Vaccine efficacy (VE) against severe-critical COVID-19 increased with D29 antibody marker level. For nAb-ID50, estimated VE (95% CI) at unquantifiable nAb-ID50 titer [ $< 4.8975$  International Units (IU)50/ml], just-quantifiable titer of 5.2 IU50/ml, and 90<sup>th</sup> percentile 28.5 IU50/ml was 58.4% (27.1%, 76.3%), 95.9% (41.1%, 99.4%), and 98.1% (55.8%, 99.4%), respectively, when using a nonparametric implementation of Gilbert et al.<sup>1</sup> (blue curve, Supplementary Fig. 36C). A similar increase was seen using an alternative Cox proportional hazards implementation of Gilbert et al.<sup>1</sup> (purple curve, Supplementary Fig. 36C). In comparison, VE estimates against moderate COVID-19 at the same titer values of unquantifiable, 5.2 IU50/ml, and 28.5 IU50/ml were 24.8% (-8.8%, 47.9%), 24.8% (-8.8%, 58.8%), and 70.1% (32.5%, 86.4%), respectively (Supplementary Fig. 37C). The severe-critical VE curves of the binding antibody markers were similar to the nAb-ID50 curve (Supplementary Fig. 37C), albeit with a smaller increase in estimated VE across the range of plotted marker values, e.g. a 22.3-fold increase in the amount of vaccine protection on the multiplicative scale for nAb-ID50 vs. a 2.4-fold increase for Spike IgG [calculated from estimated VE = 58.4% at unquantifiable nAb-ID50 titer (2.45 IU50/ml) to 98.1% at the 90<sup>th</sup> percentile (28.5 IU50/ml); for Spike IgG, estimated VE = 66.8% at negative response (5.42 BAU/ml) to 86.0% at the 90<sup>th</sup> percentile (121 BAU/ml); nonparametric curves].

Mediation analysis showed that an estimated 29.3% (1.8%, 56.8%) of VE against severe-critical COVID-19 was mediated by D29 nAb-ID50 titer (Supplementary Table 20), with a similar proportion, 23.7% (-24%, 71.4%), mediated by D29 Spike IgG concentration. In comparison, the estimated proportions of VE against moderate COVID-19 mediated by D29 nAb-ID50 titer and D29 Spike IgG concentration were 38.7% (-68.4%, 146%) and 107% (-51%, 265%), respectively (Supplementary Table 20).

#### Latin America: Synthesis scorecard and comparison of the D29 markers as correlates

Supplementary Table 23 presents the synthesis scorecard for the Latin America cohort for the D29 markers. In (A), Spike IgG was a better CoR and CoP against moderate COVID-19. RBD IgG was tied as a CoR against both endpoints and ranked as a better Modification CoP against severe-critical COVID-19,



but a better Mediation CoP against moderate COVID-19. nAb-ID50 ranked better as a CoR and as a Modification CoP against severe-critical COVID-19, but a better Mediation CoP against moderate COVID-19. In (B) (moderate to severe-critical), nAb-ID50 ranked as the best CoR and the best Modification CoP, while Spike IgG ranked as the best Mediation CoP. In (C) (severe-critical), nAb-ID50 ranked as the best CoR and CoP.

#### Latin America: Stochastic interventional vaccine efficacy (SVE)

We applied the stochastic-interventional VE (SVE) framework<sup>2</sup> to assess the D29 markers as CoPs against moderate to severe-critical COVID-19 in the Latin America cohort. For D29 nAb-ID50, estimated VE increased with shifts in titer: At no D29 nAb-ID50 shift, estimated SVE was 38.7% (95% CI: 34.3%, 42.8%), and with 1.6-fold, 4-fold, and 10-fold shifts, estimated SVE increased to 43.8% (37.8%, 49.2%), 54.5% (41.2%, 64.8%), and 59.4% (46.9%, 68.9%), respectively (Supplementary Fig. 50). The p-value for SVE changing with D29 nAb-ID50 was <0.001, providing further evidence in support of D29 nAb-ID50 as a CoP against moderate to severe-critical COVID-19. SVE estimates for the binding antibody markers (Spike IgG, RBD IgG) were not stable and are not shown.

#### Latin America: Exposure-proximal CoP analyses

Figure S54 shows the results of assessing each current marker as an exposure-proximal correlate of severe-critical COVID-19 in the Latin America cohort. Estimated exposure-proximal VE against severe-critical COVID-19 rose as current nAb-ID50 titer increased across the range of analyzed values (Supplementary Fig. 54C). Similar results were obtained for the two bAb markers (Supplementary Fig. 54A, B), except that the curves appeared less steep than the nAb-ID50 curve and had substantially wider 95% CIs at the left-end tail of each curve. Figure S55C shows that estimated VE against moderate COVID-19 also increased with current nAb-ID50 titer, with similar results for the binding antibody markers in the severe-critical COVID-19 analysis (somewhat flatter bAb vs. nAb curves, with wider 95% CIs on the bAb curves) (Supplementary Fig. S55A, B).

**Supplementary Tables:**

**Supplementary Table 1. Numbers of baseline SARS-CoV-2 seronegative per-protocol vaccine recipients, shown by baseline sampling strata and COVID-19 case/non-case status, included in the analyses.**

Case-cohort set = Baseline SARS-CoV-2 seronegative per-protocol vaccine recipients included in D29 marker correlates analysis [in the immunogenicity subcohort (IS) and/or a breakthrough COVID-19 case)]

|                                                                                          |                             | Baseline Sampling Strata of Baseline SARS-CoV-2 Seronegative Per-Protocol Vaccine Participants Included in Correlates Analyses |    |    |    |    |    |    |    |      |    |    |    |    |    |    |    | Subtotals |     |        |       |
|------------------------------------------------------------------------------------------|-----------------------------|--------------------------------------------------------------------------------------------------------------------------------|----|----|----|----|----|----|----|------|----|----|----|----|----|----|----|-----------|-----|--------|-------|
|                                                                                          |                             | 1                                                                                                                              | 2  | 3  | 4  | 5  | 6  | 7  | 8  | 9    | 10 | 11 | 12 | 13 | 14 | 15 | 16 | Total     | US  | Lat Am | S Afr |
| Breakthrough COVID-19 cases (both within and outwith the IS) with D1, D29 Ab marker data | Moderate                    | 6                                                                                                                              | 5  | 0  | 1  | 28 | 9  | 5  | 7  | 147  | 59 | 26 | 26 | 4  | 8  | 0  | 1  | 332       | 61  | 258    | 13    |
|                                                                                          | Severe-critical             | 2                                                                                                                              | 0  | 0  | 0  | 1  | 1  | 0  | 2  | 17   | 6  | 0  | 8  | 3  | 2  | 0  | 0  | 42        | 6   | 31     | 5     |
|                                                                                          | Moderate to severe-critical | 8                                                                                                                              | 5  | 0  | 1  | 29 | 10 | 5  | 9  | 163* | 65 | 26 | 34 | 7  | 10 | 0  | 1  | 373       | 67  | 288    | 18    |
| Non-cases in the IS with D1, D29 Ab marker data                                          |                             | 49                                                                                                                             | 51 | 41 | 55 | 47 | 54 | 47 | 52 | 50   | 48 | 49 | 50 | 43 | 40 | 46 | 52 | 774       | 396 | 197    | 181   |

Ab, antibody; IS, immunogenicity subcohort; Lat Am, Latin America; S Afr, South Africa; US, United States.

\*Note: In stratum 9, the number of participants with a moderate to severe-critical case (163) is one less than the number of participants with a moderate case (147) plus the number of participants with a severe-critical case (17) due to one participant having two cases at different time points (first a moderate case, and later a severe-critical case).

Demographic covariate strata:

- |                                                  |                                               |
|--------------------------------------------------|-----------------------------------------------|
| 1. Minority U.S., age 18-59, comorbidities N     | 9. Latin America, age 18-59, comorbidities N  |
| 2. Minority U.S., age 18-59, comorbidities Y     | 10. Latin America, age 18-59, comorbidities Y |
| 3. Minority U.S., age ≥ 60, comorbidities N      | 11. Latin America, age ≥ 60, comorbidities N  |
| 4. Minority U.S., age ≥ 60, comorbidities Y      | 12. Latin America, age ≥ 60, comorbidities Y  |
| 5. non-Minority U.S., age 18-59, comorbidities N | 13. South Africa, age 18-59, comorbidities N  |
| 6. non-Minority U.S., age 18-59, comorbidities Y | 14. South Africa, age 18-59, comorbidities Y  |
| 7. non-Minority U.S., age ≥ 60, comorbidities N  | 15. South Africa, age ≥ 60, comorbidities N   |
| 8. non-Minority U.S., age ≥ 60, comorbidities Y  | 16. South Africa, age ≥ 60, comorbidities Y   |

Minority is defined as the complement of being known to be White Non-Hispanic. Minority status was only reported in the U.S.

White Non-Hispanic is defined as Race=White and Ethnicity=Not Hispanic or Latino. All other Race subgroups are defined as Black, Asian, American Indian or Alaska Native, Native Hawaiian or Other Pacific Islander, Multiracial, Other, Not reported, or Unknown. (In Latin America, the American Indian or Alaska Native category was labeled as “Indigenous South American”.)

Severe-critical cases are baseline SARS-CoV-2 seronegative per-protocol vaccine recipients with the severe-critical COVID-19 endpoint (severe-critical COVID-19 with onset that was both  $\geq 28$  days post-vaccination and  $\geq 7$  days post-D29) through to the data cut (July 9, 2021).

Moderate cases are baseline SARS-CoV-2 seronegative per-protocol vaccine recipients with the moderate COVID-19 endpoint (moderate COVID-19 with onset that was both  $\geq 28$  days post-vaccination and  $\geq 7$  days post-D29) through to the data cut (July 9, 2021).

Moderate to severe-critical cases are baseline SARS-CoV-2 seronegative per-protocol vaccine recipients with the moderate to severe-critical COVID-19 endpoint (moderate to severe-critical COVID-19 with onset that was both  $\geq 28$  days post-vaccination and  $\geq 7$  days post-D29) through to the data cut (July 9, 2021).

Non-cases are baseline seronegative per-protocol vaccine recipients sampled into the immunogenicity subcohort with no evidence of SARS-CoV-2 infection up to the end of the correlates study period, which is up to 220 days post D1 but no later than the data cut (July 9, 2021).

**Supplementary Table 2. Demographics and clinical characteristics of baseline SARS-CoV-2 seronegative per-protocol trial participants in the immunogenicity subcohort and thus have D1, D29 antibody data. (all regions pooled)**

| <b>Characteristics</b>                               | <b>Vaccine<br/>(N = 839)</b> | <b>Placebo<br/>(N = 91)</b> | <b>Total<br/>(N = 930)</b> |
|------------------------------------------------------|------------------------------|-----------------------------|----------------------------|
| <b>Age</b>                                           |                              |                             |                            |
| Age 18-59                                            | 418 (49.8%)                  | 43 (47.3%)                  | 461 (49.6%)                |
| Age ≥ 60                                             | 421 (50.2%)                  | 48 (52.7%)                  | 469 (50.4%)                |
| Mean (Range)                                         | 55.4 (18.0, 90.0)            | 57.3 (26.0, 88.0)           | 55.6 (18.0, 90.0)          |
| <b>BMI</b>                                           |                              |                             |                            |
| Underweight BMI < 18.5                               | 19 (2.3%)                    | 2 (2.2%)                    | 21 (2.3%)                  |
| Normal 18.5 ≤ BMI < 25                               | 235 (28.0%)                  | 21 (23.1%)                  | 256 (27.5%)                |
| Overweight 25 ≤ BMI < 30                             | 300 (35.8%)                  | 34 (37.4%)                  | 334 (35.9%)                |
| Obese BMI ≥ 30                                       | 285 (34.0%)                  | 34 (37.4%)                  | 319 (34.3%)                |
| <b>Risk for Severe COVID-19</b>                      |                              |                             |                            |
| At-risk                                              | 436 (52.0%)                  | 45 (49.5%)                  | 481 (51.7%)                |
| Not at-risk                                          | 403 (48.0%)                  | 46 (50.5%)                  | 449 (48.3%)                |
| <b>Age, Risk for Severe COVID-19</b>                 |                              |                             |                            |
| Age 18-59 At-risk                                    | 210 (25.0%)                  | 21 (23.1%)                  | 231 (24.8%)                |
| Age 18-59 Not at-risk                                | 208 (24.8%)                  | 22 (24.2%)                  | 230 (24.7%)                |
| Age ≥ 60 At-risk                                     | 226 (26.9%)                  | 24 (26.4%)                  | 250 (26.9%)                |
| Age ≥ 60 Not at-risk                                 | 195 (23.2%)                  | 24 (26.4%)                  | 219 (23.5%)                |
| <b>Sex Assigned at Birth</b>                         |                              |                             |                            |
| Female                                               | 379 (45.2%)                  | 37 (40.7%)                  | 416 (44.7%)                |
| Male                                                 | 460 (54.8%)                  | 54 (59.3%)                  | 514 (55.3%)                |
| <b>Hispanic or Latino Ethnicity</b>                  |                              |                             |                            |
| Hispanic or Latino                                   | 314 (37.4%)                  | 33 (36.3%)                  | 347 (37.3%)                |
| Not Hispanic or Latino                               | 498 (59.4%)                  | 54 (59.3%)                  | 552 (59.4%)                |
| Not reported and unknown                             | 27 (3.2%)                    | 4 (4.4%)                    | 31 (3.3%)                  |
| <b>Race</b>                                          |                              |                             |                            |
| White                                                | 443 (52.8%)                  | 49 (53.8%)                  | 492 (52.9%)                |
| Black or African American                            | 246 (29.3%)                  | 26 (28.6%)                  | 272 (29.2%)                |
| Asian                                                | 15 (1.8%)                    |                             | 15 (1.6%)                  |
| American Indian or Alaska Native                     | 60 (7.2%)                    | 6 (6.6%)                    | 66 (7.1%)                  |
| Native Hawaiian or Other Pacific Islander            | 3 (0.4%)                     |                             | 3 (0.3%)                   |
| Multiracial                                          | 41 (4.9%)                    | 7 (7.7%)                    | 48 (5.2%)                  |
| Not reported and unknown                             | 31 (3.7%)                    | 3 (3.3%)                    | 34 (3.7%)                  |
| <b>Underrepresented Minority Status in the U.S.*</b> |                              |                             |                            |
| White Non-Hispanic                                   | 211 (25.1%)                  | 24 (26.4%)                  | 235 (25.3%)                |
| Communities of Color                                 | 205 (24.4%)                  | 24 (26.4%)                  | 229 (24.6%)                |
| <b>Country</b>                                       |                              |                             |                            |
| United States                                        | 416 (49.6%)                  | 48 (52.7%)                  | 464 (49.9%)                |
| Argentina                                            | 33 (3.9%)                    | 2 (2.2%)                    | 35 (3.8%)                  |

|                   |             |            |             |
|-------------------|-------------|------------|-------------|
| Brazil            | 93 (11.1%)  | 12 (13.2%) | 105 (11.3%) |
| Chile             | 11 (1.3%)   | 3 (3.3%)   | 14 (1.5%)   |
| Colombia          | 55 (6.6%)   | 5 (5.5%)   | 60 (6.5%)   |
| Mexico            | 7 (0.8%)    | 2 (2.2%)   | 9 (1.0%)    |
| Peru              | 21 (2.5%)   | 1 (1.1%)   | 22 (2.4%)   |
| South Africa      | 203 (24.2%) | 18 (19.8%) | 221 (23.8%) |
| <b>HIV Status</b> |             |            |             |
| Negative          | 810 (96.5%) | 89 (97.8%) | 899 (96.7%) |
| Living with HIV   | 29 (3.5%)   | 2 (2.2%)   | 31 (3.3%)   |

---

\*Data on minority status was only gathered in the U.S.

This table summarizes characteristics of per-protocol participants in the immunogenicity subcohort, which was randomly sampled from the study cohort. The sampling was stratified by strata defined by enrollment characteristics: Assigned randomization arm × Baseline SARS-CoV-2 seronegative vs. seropositive × Randomization strata. The U.S. subcohort includes 8 baseline demographic strata; the Latin America and South Africa subcohorts each include 4 baseline demographic strata.

**Supplementary Table 3. Demographics and clinical characteristics of baseline SARS-CoV-2 seronegative per-protocol trial participants in the Latin America subset of the immunogenicity subcohort (strata 9-12) and thus have D1, D29 antibody data.**

| Characteristics                      | Vaccine<br>(N = 220) | Placebo<br>(N = 25) | Total<br>(N = 245) |
|--------------------------------------|----------------------|---------------------|--------------------|
| <b>Age</b>                           |                      |                     |                    |
| Age 18-59                            | 108 (49.1%)          | 12 (48.0%)          | 120 (49.0%)        |
| Age ≥ 60                             | 112 (50.9%)          | 13 (52.0%)          | 125 (51.0%)        |
| Mean (Range)                         | 55.1 (19.0, 83.0)    | 56.6 (26.0, 88.0)   | 55.3 (19.0, 88.0)  |
| <b>BMI</b>                           |                      |                     |                    |
| Underweight BMI < 18.5               | 1 (0.5%)             |                     | 1 (0.4%)           |
| Normal 18.5 ≤ BMI < 25               | 54 (24.5%)           | 6 (24.0%)           | 60 (24.5%)         |
| Overweight 25 ≤ BMI < 30             | 95 (43.2%)           | 12 (48.0%)          | 107 (43.7%)        |
| Obese BMI ≥ 30                       | 70 (31.8%)           | 7 (28.0%)           | 77 (31.4%)         |
| <b>Risk for Severe COVID-19</b>      |                      |                     |                    |
| At-risk                              | 112 (50.9%)          | 11 (44.0%)          | 123 (50.2%)        |
| Not at-risk                          | 108 (49.1%)          | 14 (56.0%)          | 122 (49.8%)        |
| <b>Age, Risk for Severe COVID-19</b> |                      |                     |                    |
| Age 18-59 At-risk                    | 54 (24.5%)           | 5 (20.0%)           | 59 (24.1%)         |
| Age 18-59 Not at-risk                | 54 (24.5%)           | 7 (28.0%)           | 61 (24.9%)         |
| Age ≥ 60 At-risk                     | 58 (26.4%)           | 6 (24.0%)           | 64 (26.1%)         |
| Age ≥ 60 Not at-risk                 | 54 (24.5%)           | 7 (28.0%)           | 61 (24.9%)         |
| <b>Sex Assigned at Birth</b>         |                      |                     |                    |
| Female                               | 83 (37.7%)           | 8 (32.0%)           | 91 (37.1%)         |
| Male                                 | 137 (62.3%)          | 17 (68.0%)          | 154 (62.9%)        |
| <b>Hispanic or Latino Ethnicity</b>  |                      |                     |                    |
| Hispanic or Latino                   | 209 (95.0%)          | 23 (92.0%)          | 232 (94.7%)        |
| Not Hispanic or Latino               | 7 (3.2%)             | 2 (8.0%)            | 7 (2.9%)           |
| Not reported and unknown             | 4 (1.8%)             |                     | 6 (2.4%)           |
| <b>Race</b>                          |                      |                     |                    |
| White                                | 132 (60.0%)          | 14 (56.0%)          | 146 (59.6%)        |
| Black or African American            | 8 (3.6%)             | 1 (4.0%)            | 9 (3.7%)           |
| Asian                                | 1 (0.5%)             |                     | 1 (0.4%)           |
| Multiracial                          | 21 (9.5%)            | 3 (12.0%)           | 24 (9.8%)          |
| Not reported and unknown             | 9 (4.1%)             | 2 (8.0%)            | 11 (4.5%)          |
| <b>Country</b>                       |                      |                     |                    |
| Argentina                            | 33 (15.0%)           | 2 (8.0%)            | 35 (14.3%)         |
| Brazil                               | 93 (42.3%)           | 12 (48.0%)          | 105 (42.9%)        |
| Chile                                | 11 (5.0%)            | 3 (12.0%)           | 14 (5.7%)          |
| Colombia                             | 55 (25.0%)           | 5 (20.0%)           | 60 (24.5%)         |
| Mexico                               | 7 (3.2%)             | 2 (8.0%)            | 9 (3.7%)           |
| Peru                                 | 21 (9.5%)            | 1 (4.0%)            | 22 (9.0%)          |
| <b>HIV Status</b>                    |                      |                     |                    |
| Negative                             | 213 (96.8%)          | 25 (100.0%)         | 238 (97.1%)        |

Living with HIV

7 (3.2%)

7 (2.9%)

---

This table summarizes characteristics of per-protocol participants in the Latin America subset of the immunogenicity subcohort (strata 9-12), which was randomly sampled from the study cohort. The sampling was stratified by strata defined by enrollment characteristics: Assigned randomization arm × Baseline SARS-CoV-2 seronegative vs. seropositive × Randomization strata.

**Supplementary Table 4. Demographics and clinical characteristics of baseline SARS-CoV-2 seronegative per-protocol trial participants in the South Africa subset of the immunogenicity subcohort (strata 13-16) and thus have D1, D29 antibody data.**

| Characteristics                           | Vaccine<br>(N = 203) | Placebo<br>(N = 18) | Total<br>(N = 221) |
|-------------------------------------------|----------------------|---------------------|--------------------|
| <b>Age</b>                                |                      |                     |                    |
| Age 18-59                                 | 98 (48.3%)           | 6 (33.3%)           | 104 (47.1%)        |
| Age ≥ 60                                  | 105 (51.7%)          | 12 (66.7%)          | 117 (52.9%)        |
| Mean (Range)                              | 55.8 (21.0, 84.0)    | 58.9 (33.0, 83.0)   | 56.1 (21.0, 84.0)  |
| <b>BMI</b>                                |                      |                     |                    |
| Underweight BMI < 18.5                    | 17 (8.4%)            | 1 (5.6%)            | 18 (8.1%)          |
| Normal 18.5 ≤ BMI < 25                    | 73 (36.0%)           | 3 (16.7%)           | 76 (34.4%)         |
| Overweight 25 ≤ BMI < 30                  | 49 (24.1%)           | 8 (44.4%)           | 57 (25.8%)         |
| Obese BMI ≥ 30                            | 64 (31.5%)           | 6 (33.3%)           | 70 (31.7%)         |
| <b>Risk for Severe COVID-19</b>           |                      |                     |                    |
| At-risk                                   | 104 (51.2%)          | 8 (44.4%)           | 112 (50.7%)        |
| Not at-risk                               | 99 (48.8%)           | 10 (55.6%)          | 109 (49.3%)        |
| <b>Age, Risk for Severe COVID-19</b>      |                      |                     |                    |
| Age 18-59 At-risk                         | 49 (24.1%)           | 3 (16.7%)           | 52 (23.5%)         |
| Age 18-59 Not at-risk                     | 49 (24.1%)           | 3 (16.7%)           | 52 (23.5%)         |
| Age ≥ 60 At-risk                          | 55 (27.1%)           | 5 (27.8%)           | 60 (27.1%)         |
| Age ≥ 60 Not at-risk                      | 50 (24.6%)           | 7 (38.9%)           | 57 (25.8%)         |
| <b>Sex Assigned at Birth</b>              |                      |                     |                    |
| Female                                    | 101 (49.8%)          | 8 (44.4%)           | 109 (49.3%)        |
| Male                                      | 102 (50.2%)          | 10 (55.6%)          | 112 (50.7%)        |
| <b>Hispanic or Latino Ethnicity</b>       |                      |                     |                    |
| Not Hispanic or Latino                    | 195 (96.1%)          | 18 (100.0%)         | 213 (96.4%)        |
| Not reported and unknown                  | 8 (3.9%)             |                     | 8 (3.6%)           |
| <b>Race</b>                               |                      |                     |                    |
| White                                     | 40 (19.7%)           | 4 (22.2%)           | 44 (19.9%)         |
| Black or African American                 | 144 (70.9%)          | 12 (66.7%)          | 156 (70.6%)        |
| Asian                                     | 1 (0.5%)             |                     | 1 (0.5%)           |
| Native Hawaiian or Other Pacific Islander | 1 (0.5%)             |                     | 1 (0.5%)           |
| Multiracial                               | 12 (5.9%)            | 2 (11.1%)           | 14 (6.3%)          |
| Not reported and unknown                  | 5 (2.5%)             |                     | 5 (2.3%)           |
| <b>Country</b>                            |                      |                     |                    |
| South Africa                              | 203 (100.0%)         | 18 (100.0%)         | 221 (100.0%)       |
| <b>HIV Status</b>                         |                      |                     |                    |
| Negative                                  | 186 (91.6%)          | 17 (94.4%)          | 203 (91.9%)        |
| Living with HIV                           | 17 (8.4%)            | 1 (5.6%)            | 18 (8.1%)          |

This table summarizes characteristics of per-protocol participants in the South Africa subset of the immunogenicity subcohort (strata 13-16), which was randomly sampled from the study cohort. The sampling was stratified by strata defined by enrollment characteristics: Assigned randomization arm × Baseline SARS-CoV-2 seronegative vs. seropositive × Randomization strata.



**Supplementary Table 5. Demographics and clinical characteristics of baseline SARS-CoV-2 seronegative per-protocol trial participants in the United States subset of the immunogenicity subcohort (strata 1-8) and thus have D1, D29 antibody data.**

| Characteristics                                     | Vaccine<br>(N = 416) | Placebo<br>(N = 48) | Total<br>(N = 464) |
|-----------------------------------------------------|----------------------|---------------------|--------------------|
| <b>Age</b>                                          |                      |                     |                    |
| Age 18-59                                           | 212 (51.0%)          | 25 (52.1%)          | 237 (51.1%)        |
| Age ≥ 60                                            | 204 (49.0%)          | 23 (47.9%)          | 227 (48.9%)        |
| Mean (Range)                                        | 55.4 (18.0, 90.0)    | 57.1 (26.0, 81.0)   | 55.6 (18.0, 90.0)  |
| <b>BMI</b>                                          |                      |                     |                    |
| Underweight BMI < 18.5                              | 1 (0.2%)             | 1 (2.1%)            | 2 (0.4%)           |
| Normal 18.5 ≤ BMI < 25                              | 108 (26.0%)          | 12 (25.0%)          | 120 (25.9%)        |
| Overweight 25 ≤ BMI < 30                            | 156 (37.5%)          | 14 (29.2%)          | 170 (36.6%)        |
| Obese BMI ≥ 30                                      | 151 (36.3%)          | 21 (43.8%)          | 172 (37.1%)        |
| <b>Risk for Severe COVID-19</b>                     |                      |                     |                    |
| At-risk                                             | 220 (52.9%)          | 26 (54.2%)          | 246 (53.0%)        |
| Not at-risk                                         | 196 (47.1%)          | 22 (45.8%)          | 218 (47.0%)        |
| <b>Age, Risk for Severe COVID-19</b>                |                      |                     |                    |
| Age 18-59 At-risk                                   | 107 (25.7%)          | 13 (27.1%)          | 120 (25.9%)        |
| Age 18-59 Not at-risk                               | 105 (25.2%)          | 12 (25.0%)          | 117 (25.2%)        |
| Age ≥ 60 At-risk                                    | 113 (27.2%)          | 13 (27.1%)          | 126 (27.2%)        |
| Age ≥ 60 Not at-risk                                | 91 (21.9%)           | 10 (20.8%)          | 101 (21.8%)        |
| <b>Sex Assigned at Birth</b>                        |                      |                     |                    |
| Female                                              | 195 (46.9%)          | 21 (43.8%)          | 216 (46.6%)        |
| Male                                                | 221 (53.1%)          | 27 (56.2%)          | 248 (53.4%)        |
| <b>Hispanic or Latino Ethnicity</b>                 |                      |                     |                    |
| Hispanic or Latino                                  | 105 (25.2%)          | 10 (20.8%)          | 115 (24.8%)        |
| Not Hispanic or Latino                              | 296 (71.2%)          | 36 (75.0%)          | 332 (71.6%)        |
| Not reported and unknown                            | 15 (3.6%)            | 2 (4.2%)            | 17 (3.7%)          |
| <b>Race</b>                                         |                      |                     |                    |
| White                                               | 271 (65.1%)          | 31 (64.6%)          | 302 (65.1%)        |
| Black or African American                           | 94 (22.6%)           | 13 (27.1%)          | 107 (23.1%)        |
| Asian                                               | 13 (3.1%)            |                     | 13 (2.8%)          |
| American Indian or Alaska Native                    | 11 (2.6%)            | 1 (2.1%)            | 12 (2.6%)          |
| Native Hawaiian or Other Pacific Islander           | 2 (0.5%)             |                     | 2 (0.4%)           |
| Multiracial                                         | 8 (1.9%)             | 2 (4.2%)            | 10 (2.2%)          |
| Not reported and unknown                            | 17 (4.1%)            | 1 (2.1%)            | 18 (3.9%)          |
| <b>Underrepresented Minority Status in the U.S.</b> |                      |                     |                    |
| White Non-Hispanic                                  | 211 (50.7%)          | 24 (50.0%)          | 235 (50.6%)        |
| Communities of Color                                | 205 (49.3%)          | 24 (50.0%)          | 229 (49.4%)        |
| <b>Country</b>                                      |                      |                     |                    |
| United States                                       | 416 (100.0%)         | 48 (100.0%)         | 464 (100.0%)       |
| <b>HIV Status</b>                                   |                      |                     |                    |

|                 |             |            |             |
|-----------------|-------------|------------|-------------|
| Negative        | 411 (98.8%) | 47 (97.9%) | 458 (98.7%) |
| Living with HIV | 5 (1.2%)    | 1 (2.1%)   | 6 (1.3%)    |

---

This table summarizes characteristics of per-protocol participants in the United States subset of the immunogenicity subcohort (strata 1-8), which was randomly sampled from the study cohort. The sampling was stratified by strata defined by enrollment characteristics: Assigned randomization arm × Baseline SARS-CoV-2 seronegative vs. seropositive × Randomization strata.

**Supplementary Table 6. Symptoms of the 42 severe-critical COVID-19 cases in the vaccine group included in the analyses.**

| <b>Symptom</b>                                                                                                                                                                                                                                                                                                                                                                                                                                                                                 | <b>No. of Severe-Critical COVID-19 Cases (Vaccine Group)</b> |
|------------------------------------------------------------------------------------------------------------------------------------------------------------------------------------------------------------------------------------------------------------------------------------------------------------------------------------------------------------------------------------------------------------------------------------------------------------------------------------------------|--------------------------------------------------------------|
| Shortness of breath                                                                                                                                                                                                                                                                                                                                                                                                                                                                            | 24                                                           |
| Respiratory Rate $\geq 20$ breaths/minute                                                                                                                                                                                                                                                                                                                                                                                                                                                      | 9                                                            |
| Abnormal saturation of oxygen (SpO <sub>2</sub> ) but still $>93\%$                                                                                                                                                                                                                                                                                                                                                                                                                            | 22                                                           |
| Clinical or radiologic evidence of pneumonia OR COVID-19 pneumonia                                                                                                                                                                                                                                                                                                                                                                                                                             | 5                                                            |
| Radiologic evidence of DVT                                                                                                                                                                                                                                                                                                                                                                                                                                                                     | 1                                                            |
| Highest temperature was $\geq 38.0$ °C                                                                                                                                                                                                                                                                                                                                                                                                                                                         | 16                                                           |
| Heart rate $\geq 90$ beats/minute                                                                                                                                                                                                                                                                                                                                                                                                                                                              | 30                                                           |
| Shaking chills or rigors OR Chills or uncontrollable body shaking/shivering                                                                                                                                                                                                                                                                                                                                                                                                                    | 19                                                           |
| Cough                                                                                                                                                                                                                                                                                                                                                                                                                                                                                          | 28                                                           |
| Sore throat                                                                                                                                                                                                                                                                                                                                                                                                                                                                                    | 28                                                           |
| Malaise                                                                                                                                                                                                                                                                                                                                                                                                                                                                                        | 34                                                           |
| Headache                                                                                                                                                                                                                                                                                                                                                                                                                                                                                       | 28                                                           |
| Myalgia OR Muscle aches/pains                                                                                                                                                                                                                                                                                                                                                                                                                                                                  | 26                                                           |
| Gastrointestinal symptoms OR Diarrhea, vomiting, nausea, abdominal/stomach pain                                                                                                                                                                                                                                                                                                                                                                                                                | 22                                                           |
| Anosmia (olfactory or taste disorders) OR Decreased sense of smell or Decreased sense of taste                                                                                                                                                                                                                                                                                                                                                                                                 | 23                                                           |
| Chilblains/pernio (red or bruised looking feet or toes) OR Red or bruised looking feet or toes                                                                                                                                                                                                                                                                                                                                                                                                 | 3                                                            |
| Clinical signs at rest indicative of severe systemic illness (respiratory rate $\geq 30$ breaths/minute, heart rate $\geq 125$ beats/minute, oxygen saturation (SpO <sub>2</sub> ) $\leq 93\%$ on room air at sea level, or partial pressure of oxygen/fraction of inspired oxygen (PaO <sub>2</sub> /FiO <sub>2</sub> ) $< 300$ mmHg OR One of vital signs abnormality occurred: SpO <sub>2</sub> $\leq 93\%$ , Heart rate $\geq 125$ beats/minute, Respiratory Rate $\geq 30$ breaths/minute | 38                                                           |
| Respiratory failure (defined as needing high-flow oxygen, non-invasive ventilation, mechanical ventilation, or extracorporeal membrane oxygenation [ECMO] OR One of vital signs abnormality occurred: SpO <sub>2</sub> $\leq 93\%$ , Heart rate $\geq 125$ beats/minute, Respiratory Rate $\geq 30$ breaths/minute                                                                                                                                                                             | 1                                                            |
| Shock (defined as systolic blood pressure $< 90$ mmHg, diastolic blood pressure $< 60$ mmHg, or requiring vasopressors)                                                                                                                                                                                                                                                                                                                                                                        | 0                                                            |
| Significant acute renal, hepatic or neurologic dysfunction                                                                                                                                                                                                                                                                                                                                                                                                                                     | 4                                                            |
| Fatality                                                                                                                                                                                                                                                                                                                                                                                                                                                                                       | 0                                                            |

**Supplementary Table 7. Numbers of symptoms per severe-critical COVID-19 case (vaccine group) for the 42 severe-critical cases included in the analysis. A list of the 21 symptoms is provided in Supplementary Table 6.**

| <b>No. of Symptoms<br/>(of the 21 in<br/>Supplementary<br/>Table 6)</b> | <b>No. of Severe-<br/>Critical COVID-19<br/>Cases (Vaccine<br/>Group)</b> |
|-------------------------------------------------------------------------|---------------------------------------------------------------------------|
| $\leq 3$                                                                | 8                                                                         |
| 4 to 6                                                                  | 3                                                                         |
| 7 to 9                                                                  | 5                                                                         |
| 10 to 12                                                                | 21                                                                        |
| 13 to 15                                                                | 5                                                                         |
| $\geq 16$                                                               | 0                                                                         |

**Supplementary Table 8. D1 and D29 geometric mean titers (GMTs) and geometric mean concentrations (GMCs) for baseline SARS-CoV-2 seronegative vaccine recipients in the immunogenicity subcohort, shown separately by sex.**

| Sex    | Visit  | Arm     | Baseline SARS-CoV-2 | Marker                  | N   | GMT/GMC (95% CI)     |
|--------|--------|---------|---------------------|-------------------------|-----|----------------------|
| Male   | Day 1  | Vaccine | Negative            | Anti RBD IgG (BAU/ml)   | 461 | 7.35 (7.14, 7.58)    |
| Male   | Day 1  | Vaccine | Negative            | Anti Spike IgG (BAU/ml) | 461 | 5.62 (5.43, 5.81)    |
| Male   | Day 1  | Vaccine | Negative            | nAb-ID50 (IU50/ml)      | 461 | 1.46 (1.39, 1.54)    |
| Male   | Day 29 | Vaccine | Negative            | Anti RBD IgG (BAU/ml)   | 461 | 30.30 (27.38, 33.53) |
| Male   | Day 29 | Vaccine | Negative            | Anti Spike IgG (BAU/ml) | 461 | 31.82 (28.38, 35.66) |
| Male   | Day 29 | Vaccine | Negative            | nAb-ID50 (IU50/ml)      | 461 | 4.61 (3.98, 5.35)    |
| Female | Day 1  | Vaccine | Negative            | Anti RBD IgG (BAU/ml)   | 383 | 7.38 (7.12, 7.65)    |
| Female | Day 1  | Vaccine | Negative            | Anti Spike IgG (BAU/ml) | 383 | 5.63 (5.43, 5.84)    |
| Female | Day 1  | Vaccine | Negative            | nAb-ID50 (IU50/ml)      | 383 | 1.40 (1.37, 1.42)    |
| Female | Day 29 | Vaccine | Negative            | Anti RBD IgG (BAU/ml)   | 383 | 34.95 (30.70, 39.78) |
| Female | Day 29 | Vaccine | Negative            | Anti Spike IgG (BAU/ml) | 383 | 36.52 (31.76, 42.00) |
| Female | Day 29 | Vaccine | Negative            | nAb-ID50 (IU50/ml)      | 383 | 5.31 (4.45, 6.33)    |

BAU, binding antibody units; IU, international units; nAb-ID50, 50% inhibitory dilution neutralizing antibody titer.

**Supplementary Table 9. Ratios (Males/Females) of D1 and D29 geometric mean titers (GMTs) and geometric mean concentrations (GMCs) for baseline SARS-CoV-2 seronegative vaccine recipients in the immunogenicity subcohort.** Source values for the ratios are in Supplementary Table 8.

| Visit  | Arm     | Baseline SARS-CoV-2 | Marker                  | Ratio (Male/Female)<br>of GMT or GMC (95% CI) |
|--------|---------|---------------------|-------------------------|-----------------------------------------------|
| Day 1  | Vaccine | Negative            | Anti RBD IgG (BAU/ml)   | 1.00 (0.95, 1.04)                             |
| Day 1  | Vaccine | Negative            | Anti Spike IgG (BAU/ml) | 1.00 (0.95, 1.05)                             |
| Day 1  | Vaccine | Negative            | nAb-ID50 (IU50/ml)      | 1.05 (1.00, 1.10)                             |
| Day 29 | Vaccine | Negative            | Anti RBD IgG (BAU/ml)   | 0.87 (0.73, 1.02)                             |
| Day 29 | Vaccine | Negative            | Anti Spike IgG (BAU/ml) | 0.87 (0.73, 1.04)                             |
| Day 29 | Vaccine | Negative            | nAb-ID50 (IU50/ml)      | 0.87 (0.69, 1.10)                             |

BAU, binding antibody units; IU, international units; nAb-ID50, 50% inhibitory dilution neutralizing antibody titer.

**Supplementary Table 10. Limits of the Spike IgG binding antibody assay, the RBD binding antibody assay, and the pseudovirus neutralizing antibody assay.**

| MSD Binding Assay (VRC)                                             |          |          |
|---------------------------------------------------------------------|----------|----------|
| Reported units                                                      | BAU/ml   |          |
|                                                                     | Spike    | RBD      |
| Positivity Cutoff                                                   | 10.8424  | 14.0858  |
| LOD                                                                 | 0.3076   | 1.5936   |
| LLOQ                                                                | 1.8429   | 5.0243   |
| ULOQ                                                                | 238.1165 | 172.5755 |
| All values < Positivity Cutoff were set to Positivity Cutoff/2      |          |          |
| All values > ULOQ were set to ULOQ (for immune correlates analyses) |          |          |
| Pseudovirus neutralization ID50 titer (Monogram)                    |          |          |
| Reported units                                                      | IU50/ml  |          |
| LOD                                                                 | N/A      |          |
| LLOQ                                                                | 4.8975   |          |
| ULOQ                                                                | 844.7208 |          |
| All values < LLOQ were set to LLOQ/2                                |          |          |
| All values > ULOQ were set to ULOQ (for immune correlates analyses) |          |          |

BAU = binding antibody units; IU = International Units; LLOQ, lower limit of quantitation; LOD, limit of detection; RBD, receptor binding domain; ULOQ, upper limit of quantitation.

**Supplementary Table 11. Covariate-adjusted hazard ratios of severe-critical COVID-19, moderate COVID-19, or moderate to severe-critical COVID-19 per 10-fold increase or per standard deviation increase in each D29 antibody marker.** Analyses were based on baseline SARS-CoV-2 seronegative per-protocol vaccine recipients and adjusted for baseline behavioral risk score and geographic region.

| <b>Severe-Critical COVID-19</b>             |                        |                         |            |                   |                   |                    |                    |            |
|---------------------------------------------|------------------------|-------------------------|------------|-------------------|-------------------|--------------------|--------------------|------------|
| D29 Marker                                  | No. cases/No. at-risk  | HR per 10-fold increase |            | p-value (2-sided) | FDR-adj p-value   | FWER-adj p-value   | HR per SD increase |            |
|                                             |                        | Pt. Est.                | 95% CI     |                   |                   |                    | Pt. Est.           | 95% CI     |
| Spike IgG (BAU/ml)                          | 46/18,163              | 0.67                    | 0.32, 1.39 | 0.285             | 0.619             | 0.567              | 0.83               | 0.59, 1.17 |
| RBD IgG (BAU/ml)                            | 46/18,163              | 0.79                    | 0.33, 1.85 | 0.583             | 0.633             | 0.793              | 0.90               | 0.63, 1.30 |
| nAb-ID50 (IU50/ml)                          | 46/18,163              | 0.35                    | 0.13, 0.90 | 0.030             | 0.106             | 0.098              | 0.59               | 0.36, 0.95 |
| <b>Moderate COVID-19</b>                    |                        |                         |            |                   |                   |                    |                    |            |
| D29 Marker                                  | No. cases/No. at-risk* | HR per 10-fold increase |            | p-value (2-sided) | FDR-adj p-value** | FWER-adj p-value** | HR per SD increase |            |
|                                             |                        | Pt. Est.                | 95% CI     |                   |                   |                    | Pt. Est.           | 95% CI     |
| Spike IgG (BAU/ml)                          | 375/18,163             | 0.67                    | 0.45, 1.01 | 0.057             | 0.114             | 0.146              | 0.83               | 0.69, 1.01 |
| RBD IgG (BAU/ml)                            | 375/18,163             | 0.59                    | 0.37, 0.93 | 0.025             | 0.073             | 0.076              | 0.80               | 0.65, 0.97 |
| nAb-ID50 (IU50/ml)                          | 375/18,163             | 0.53                    | 0.34, 0.82 | 0.005             | 0.052             | 0.031              | 0.73               | 0.58, 0.91 |
| <b>Moderate to Severe-Critical COVID-19</b> |                        |                         |            |                   |                   |                    |                    |            |
| D29 Marker                                  | No. cases/No. at-risk  | HR per 10-fold increase |            | p-value (2-sided) | FDR-adj p-value   | FWER-adj p-value   | HR per SD increase |            |
|                                             |                        | Pt. Est.                | 95% CI     |                   |                   |                    | Pt. Est.           | 95% CI     |
| Spike IgG (BAU/ml)                          | 420/18,163             | 0.67                    | 0.45, 1.00 | 0.048             | 0.103             | 0.128              | 0.83               | 0.69, 1.00 |
| RBD IgG (BAU/ml)                            | 420/18,163             | 0.60                    | 0.38, 0.95 | 0.028             | 0.082             | 0.084              | 0.80               | 0.66, 0.98 |
| nAb-ID50 (IU50/ml)                          | 420/18,163             | 0.50                    | 0.32, 0.78 | 0.002             | 0.026             | 0.016              | 0.71               | 0.57, 0.88 |

\*No. at-risk = estimated number in the population for analysis, i.e. baseline negative per-protocol vaccine recipients not experiencing the designated COVID-19 endpoint or infected through 6 days post Day 29 visit; no. cases = number of this cohort with an observed designated COVID-19 endpoint (calculated via inverse probability of sampling Day 29 marker weighting).  
 \*\*q-value and FWER (family-wide error rate) are computed over the set of p-values both for quantitative markers and categorical markers using the Westfall and Young permutation method (10000 replicates).  
 p-values were obtained using a two-sided Wald test.  
 Cases were counted starting 7 days post Day 29.

BAU, antibody binding units; CI, confidence interval; FDR, false discovery rate; FWER, family-wise error rate; HR, hazard ratio; IU, international units; nAb-ID50, 50% inhibitory dilution neutralizing antibody; Pt. Est., point estimate; RBD, receptor binding domain; SD, standard deviation.



**Supplementary Table 12. Covariate-adjusted hazard ratios of severe-critical COVID-19, moderate COVID-19, or moderate to severe-critical COVID-19 per 10-fold increase or per standard deviation increase in each D29 antibody marker in participants in Latin America.** Analyses were based on baseline SARS-CoV-2 seronegative per-protocol vaccine recipients in Latin America and adjusted for baseline behavioral risk score.

| <b>Severe-Critical COVID-19</b>             |                        |                                  |            |                   |                   |                    |                             |            |
|---------------------------------------------|------------------------|----------------------------------|------------|-------------------|-------------------|--------------------|-----------------------------|------------|
| D29 Marker                                  | No. cases/No. at-risk  | HR per 10-fold increase Pt. Est. | 95% CI     | p-value (2-sided) | FDR-adj p-value   | FWER-adj p-value   | HR per SD increase Pt. Est. | 95% CI     |
| Spike IgG (BAU/ml)                          | 34/7,694               | 0.70                             | 0.29, 1.66 | 0.415             | 0.774             | 0.753              | 0.84                        | 0.56, 1.27 |
| RBD IgG (BAU/ml)                            | 34/7,694               | 0.75                             | 0.26, 2.11 | 0.580             | 0.783             | 0.875              | 0.88                        | 0.57, 1.37 |
| nAb-ID50 (IU50/ml)                          | 34/7,694               | 0.20                             | 0.05, 0.73 | 0.015             | 0.047             | 0.048              | 0.45                        | 0.24, 0.86 |
| <b>Moderate COVID-19</b>                    |                        |                                  |            |                   |                   |                    |                             |            |
| D29 Marker                                  | No. cases/No. at-risk* | HR per 10-fold increase Pt. Est. | 95% CI     | p-value (2-sided) | FDR-adj p-value** | FWER-adj p-value** | HR per SD increase Pt. Est. | 95% CI     |
| Spike IgG (BAU/ml)                          | 290/7,694              | 0.67                             | 0.40, 1.10 | 0.114             | 0.197             | 0.262              | 0.83                        | 0.65, 1.05 |
| RBD IgG (BAU/ml)                            | 290/7,694              | 0.55                             | 0.31, 0.99 | 0.047             | 0.138             | 0.135              | 0.78                        | 0.61, 1.00 |
| nAb-ID50 (IU50/ml)                          | 290/7,694              | 0.53                             | 0.32, 0.90 | 0.018             | 0.138             | 0.085              | 0.74                        | 0.57, 0.95 |
| <b>Moderate to Severe-Critical COVID-19</b> |                        |                                  |            |                   |                   |                    |                             |            |
| D29 Marker                                  | No. cases/No. at-risk  | HR per 10-fold increase Pt. Est. | 95% CI     | p-value (2-sided) | FDR-adj p-value   | FWER-adj p-value   | HR per SD increase Pt. Est. | 95% CI     |
| Spike IgG (BAU/ml)                          | 323/7,694              | 0.66                             | 0.40, 1.09 | 0.106             | 0.207             | 0.254              | 0.83                        | 0.65, 1.04 |
| RBD IgG (BAU/ml)                            | 323/7,694              | 0.56                             | 0.32, 1.00 | 0.052             | 0.151             | 0.143              | 0.79                        | 0.62, 1.00 |
| nAb-ID50 (IU50/ml)                          | 323/7,694              | 0.49                             | 0.29, 0.82 | 0.007             | 0.062             | 0.040              | 0.70                        | 0.54, 0.91 |

\*No. at-risk = estimated number in the population for analysis, i.e. baseline negative per-protocol vaccine recipients in Latin America not experiencing the designated COVID-19 endpoint or infected through 6 days post Day 29 visit; no. cases = number of this cohort with an observed designated COVID-19 endpoint (calculated via inverse probability of sampling Day 29 marker weighting).

\*\*q-value and FWER (family-wide error rate) are computed over the set of p-values both for quantitative markers and categorical markers using the Westfall and Young permutation method (10000 replicates).

p-values were obtained using a two-sided Wald test.

Cases were counted starting 7 days post Day 29.

BAU, antibody binding units; CI, confidence interval; FDR, false discovery rate; FWER, family-wise error rate; HR, hazard ratio; IU, international units; nAb-ID50, 50% inhibitory dilution neutralizing antibody; Pt. Est., point estimate; RBD, receptor binding domain; SD, standard deviation.

**Supplementary Table 13. Covariate-adjusted hazard ratios of moderate to severe-critical COVID-19 per 10-fold increase or per standard deviation increase in each D29 antibody marker in participants in South Africa.** Analyses were based on baseline SARS-CoV-2 seronegative per-protocol vaccine recipients in South Africa and adjusted for baseline behavioral risk score. Hazard ratios of severe-critical COVID-19 could not be assessed due to too few severe-critical cases in South Africa.

| D29 Marker         | No. cases/No. at-risk | Moderate to Severe-Critical COVID-19 |            |                   |                 |                  |                             |            |
|--------------------|-----------------------|--------------------------------------|------------|-------------------|-----------------|------------------|-----------------------------|------------|
|                    |                       | HR per 10-fold increase Pt. Est.     | 95% CI     | p-value (2-sided) | FDR-adj p-value | FWER-adj p-value | HR per SD increase Pt. Est. | 95% CI     |
| Spike IgG (BAU/ml) | 22/2,214              | 0.74                                 | 0.26, 2.17 | 0.590             | 0.905           | 0.952            | 0.87                        | 0.53, 1.43 |
| RBD IgG (BAU/ml)   | 22/2,214              | 0.87                                 | 0.20, 3.83 | 0.858             | 0.931           | 0.998            | 0.94                        | 0.50, 1.77 |
| nAb-ID50 (IU50/ml) | 22/2,214              | 0.78                                 | 0.30, 2.00 | 0.608             | 0.905           | 0.952            | 0.88                        | 0.53, 1.45 |

\*No. at-risk = estimated number in the population for analysis, i.e. baseline negative per-protocol vaccine recipients in South Africa not experiencing the designated COVID-19 endpoint or infected through 6 days post Day 29 visit; no. cases = number of this cohort with an observed designated COVID-19 endpoint (calculated via inverse probability of sampling Day 29 marker weighting).

\*\*q-value and FWER (family-wide error rate) are computed over the set of p-values both for quantitative markers and categorical markers using the Westfall and Young permutation method (10000 replicates).

p-values were obtained using a two-sided Wald test.

Cases were counted starting 7 days post Day 29.

BAU, antibody binding units; CI, confidence interval; FDR, false discovery rate; FWER, family-wise error rate; HR, hazard ratio; IU, international units; nAb-ID50, 50% inhibitory dilution neutralizing antibody; Pt. Est., point estimate; RBD, receptor binding domain; SD, standard deviation.

**Supplementary Table 14. Covariate-adjusted hazard ratios of moderate to severe-critical COVID-19 per 10-fold increase or per standard deviation (SD) increase in each D29 antibody marker in participants in the United States.** Analyses were based on baseline SARS-CoV-2 seronegative per-protocol vaccine recipients in the United States and adjusted for baseline behavioral risk score. Hazard ratios of severe-critical COVID-19 could not be assessed due to too few severe-critical cases in the United States.

| D29 Marker         | No. cases/No. at-risk | Moderate to Severe-Critical COVID-19 |            |                   |                 |                  | HR per SD increase |            |
|--------------------|-----------------------|--------------------------------------|------------|-------------------|-----------------|------------------|--------------------|------------|
|                    |                       | HR per 10-fold increase Pt. Est.     | 95% CI     | p-value (2-sided) | FDR-adj p-value | FWER-adj p-value | Pt. Est.           | 95% CI     |
| Spike IgG (BAU/ml) | 75/8,255              | 0.63                                 | 0.37, 1.10 | 0.103             | 0.205           | 0.253            | 0.81               | 0.62, 1.04 |
| RBD IgG (BAU/ml)   | 75/8,255              | 0.67                                 | 0.37, 1.22 | 0.188             | 0.297           | 0.396            | 0.84               | 0.65, 1.09 |
| nAb-ID50 (IU50/ml) | 75/8,255              | 0.51                                 | 0.26, 0.98 | 0.045             | 0.169           | 0.150            | 0.71               | 0.51, 0.99 |

\*No. at-risk = estimated number in the population for analysis, i.e. baseline negative per-protocol vaccine recipients in the United States not experiencing the designated COVID-19 endpoint or infected through 6 days post Day 29 visit; no. cases = number of this cohort with an observed designated COVID-19 endpoint (calculated via inverse probability of sampling Day 29 marker weighting).

\*\*q-value and FWER (family-wide error rate) are computed over the set of p-values both for quantitative markers and categorical markers using the Westfall and Young permutation method (10000 replicates).

p-values were obtained using a two-sided Wald test.

Cases were counted starting 7 days post Day 29.

BAU, antibody binding units; CI, confidence interval; FDR, false discovery rate; FWER, family-wise error rate; HR, hazard ratio; IU, international units; nAb-ID50, 50% inhibitory dilution neutralizing antibody; Pt. Est., point estimate; RBD, receptor binding domain; SD, standard deviation.

**Supplementary Table 15. Covariate-adjusted hazard ratios, assessed using multivariable models, of moderate COVID-19, severe-critical COVID-19, or moderate to severe-critical COVID-19 per 10-fold increase in each D29 antibody marker.** Analyses were based on baseline SARS-CoV-2 seronegative per-protocol vaccine recipients and adjusted for baseline behavioral risk score and geographic region.

|                        | Severe-Critical COVID-19 |         | Moderate COVID-19     |         | Moderate to Severe-Critical COVID-19 |         |
|------------------------|--------------------------|---------|-----------------------|---------|--------------------------------------|---------|
|                        | Hazard Ratio (95% CI)    | P-value | Hazard Ratio (95% CI) | P-value | Hazard Ratio (95% CI)                | P-value |
| Risk score             | 2.27 (1.28, 4.04)        | 0.005   | 1.59 (1.16, 2.19)     | 0.004   | 1.66 (1.21, 1.27)                    | 0.002   |
| Region: Latin America* | 1.56 (0.50, 4.82)        | 0.441   | 1.82 (1.19, 2.79)     | 0.006   | 1.79 (1.18, 2.71)                    | 0.006   |
| Region: South Africa*  | 2.57 (0.77, 8.55)        | 0.124   | 0.65 (0.36, 1.16)     | 0.145   | 0.81 (0.49, 1.34)                    | 0.412   |
| Spike IgG (BAU/ml)     | 1.22 (0.49, 3.02)        | 0.674   | 0.92 (0.57, 1.50)     | 0.741   | 0.94 (0.58, 1.52)                    | 0.807   |
| nAb-ID50 (IU50/ml)     | 0.31 (0.11, 0.89)        | 0.029   | 0.55 (0.33, 0.92)     | 0.023   | 0.52 (0.31, 0.86)                    | 0.011   |

\*Reference region = United States.

Maximum failure event time 181 days (moderate COVID-19), 170 days (severe-critical COVID-19), or 181 days (moderate to severe-critical COVID-19) post D29. Cases were counted starting 7 days post D29.

P-values are unadjusted and were obtained using a two-sided Wald test.

BAU, antibody binding units; CI, confidence interval; IU, international units; nAb-ID50, 50% inhibitory dilution neutralizing antibody.

**Supplementary Table 16. Covariate-adjusted hazard ratios, assessed using multivariable models, of moderate COVID-19, severe-critical COVID-19, or moderate to severe-critical COVID-19 per 10-fold increase in each D29 antibody marker in participants in Latin America.** Analyses were based on baseline SARS-CoV-2 seronegative per-protocol vaccine recipients in Latin America and adjusted for baseline behavioral risk score.

|                    | Severe-Critical COVID-19 |         | Moderate COVID-19     |         | Moderate to Severe-Critical COVID-19 |         |
|--------------------|--------------------------|---------|-----------------------|---------|--------------------------------------|---------|
|                    | Hazard Ratio (95% CI)    | P-value | Hazard Ratio (95% CI) | P-value | Hazard Ratio (95% CI)                | P-value |
| Risk score         | 2.36 (1.16, 4.83)        | 0.018   | 1.41 (1.01, 1.98)     | 0.046   | 1.49 (1.06, 2.10)                    | 0.023   |
| Spike IgG (BAU/ml) | 1.92 (0.55, 6.75)        | 0.310   | 0.92 (0.50, 1.70)     | 0.796   | 0.98 (0.53, 1.81)                    | 0.950   |
| nAb-ID50 (IU50/ml) | 0.14 (0.03, 0.60)        | 0.008   | 0.56 (0.30, 1.02)     | 0.059   | 0.49 (0.27, 0.91)                    | 0.024   |

Maximum failure event time 181 days (moderate COVID-19), 170 days (severe-critical COVID-19), or 181 days (moderate to severe-critical COVID-19) post D29. Cases were counted starting 7 days post D29.

P-values are unadjusted and were obtained using a two-sided Wald test.

BAU, antibody binding units; CI, confidence interval; IU, international units; nAb-ID50, 50% inhibitory dilution neutralizing antibody.

**Supplementary Table 17. Covariate-adjusted hazard ratios, assessed using multivariable models, of moderate to severe-critical COVID-19 per 10-fold increase in each D29 antibody marker in participants in South Africa.** Analyses were based on baseline SARS-CoV-2 seronegative per-protocol vaccine recipients in South Africa and adjusted for baseline behavioral risk score. Hazard ratios of severe-critical COVID-19 could not be assessed due to too few severe-critical cases in South Africa.

|                    | <b>Moderate to Severe-Critical COVID-19</b> |         |
|--------------------|---------------------------------------------|---------|
|                    | Hazard Ratio (95% CI)                       | P-value |
| Risk score         | 4.32 (1.40, 13.34)                          | 0.011   |
| Spike IgG (BAU/ml) | 0.81 (0.24, 2.80)                           | 0.744   |
| nAb-ID50 (IU50/ml) | 0.86 (0.30, 2.47)                           | 0.777   |

Maximum failure event time 101 days (same for moderate COVID-19 and for moderate to severe-critical COVID-19) post D29. Cases were counted starting 7 days post D29.

P-values are unadjusted and were obtained using a two-sided Wald test.

BAU, antibody binding units; CI, confidence interval; IU, international units; nAb-ID50, 50% inhibitory dilution neutralizing antibody.

**Supplementary Table 18. Covariate-adjusted hazard ratios, assessed using multivariable models, of moderate to severe-critical COVID-19 per 10-fold increase in each D29 antibody marker in participants in the United States.** Analyses were based on baseline SARS-CoV-2 seronegative per-protocol vaccine recipients in the United States and adjusted for baseline behavioral risk score. Hazard ratios of severe-critical COVID-19 could not be assessed due to too few severe-critical cases in the United States.

|                    | <b>Moderate to Severe-Critical COVID-19</b> |         |
|--------------------|---------------------------------------------|---------|
|                    | Hazard Ratio (95% CI)                       | P-value |
| Risk score         | 3.49 (1.55, 7.87)                           | 0.003   |
| Spike IgG (BAU/ml) | 0.79 (0.42, 1.48)                           | 0.466   |
| nAb-ID50 (IU50/ml) | 0.58 (0.29, 1.17)                           | 0.127   |

Maximum failure event time 109 days (same for moderate COVID-19 and for moderate to severe-critical COVID-19) post D29. Cases were counted starting 7 days post D29.

P-values are unadjusted and were obtained using a two-sided Wald test.

BAU, antibody binding units; CI, confidence interval; IU, international units; nAb-ID50, 50% inhibitory dilution neutralizing antibody.

**Supplementary Table 19. Mediation effect estimates for D29 quantitative markers with 95% confidence intervals.**

Non-marker mediated VE = VE comparing vaccine vs. placebo with antibody marker set to value if assigned placebo.

Marker-mediated VE = VE in vaccinated comparing observed antibody marker vs. hypothetical marker had the participant received placebo.

Prop. Mediated = fraction of total risk reduction from vaccine attributed to the antibody marker.

| <b>VE Against Severe-Critical COVID-19</b>             |                                 |                             |                         |
|--------------------------------------------------------|---------------------------------|-----------------------------|-------------------------|
|                                                        | Non-Marker Mediated VE (95% CI) | Marker Mediated VE (95% CI) | Prop. Mediated (95% CI) |
| Spike IgG (BAU/ml)                                     | 0.667 (0.191, 0.863)            | 0.297 (-0.349, 0.634)       | 0.243 (-0.214, 0.700)   |
| RBD IgG (BAU/ml)                                       | 0.696 (0.257, 0.876)            | 0.228 (-0.497, 0.602)       | 0.179 (-0.282, 0.639)   |
| nAb-ID50 (IU50/ml)                                     | 0.645 (0.311, 0.817)            | 0.340 (0.166, 0.477)        | 0.286 (0.085, 0.487)    |
| <b>VE Against Moderate COVID-19</b>                    |                                 |                             |                         |
|                                                        | Non-Marker Mediated VE (95% CI) | Marker Mediated VE (95% CI) | Prop. Mediated (95% CI) |
| Spike IgG (BAU/ml)                                     | -0.013 (-0.605, 0.361)          | 0.365 (0.031, 0.583)        | 1.03 (-0.022, 2.08)     |
| RBD IgG (BAU/ml)                                       | 0.063 (-0.410, 0.377)           | 0.313 (0.002, 0.527)        | 0.852 (-0.051, 1.76)    |
| nAb-ID50 (IU50/ml)                                     | 0.196 (-0.048, 0.383)           | 0.199 (0.017, 0.348)        | 0.505 (0.008, 1.00)     |
| <b>VE Against Moderate to Severe-Critical COVID-19</b> |                                 |                             |                         |
|                                                        | Non-Marker Mediated VE (95% CI) | Marker Mediated VE (95% CI) | Prop. Mediated (95% CI) |
| Spike IgG (BAU/ml)                                     | 0.160 (-0.311, 0.461)           | 0.364 (0.057, 0.572)        | 0.723 (0.051, 1.39)     |
| RBD IgG (BAU/ml)                                       | 0.220 (-0.164, 0.478)           | 0.315 (0.025, 0.519)        | 0.603 (0.015, 1.19)     |
| nAb-ID50 (IU50/ml)                                     | 0.307 (0.090, 0.472)            | 0.229 (0.065, 0.365)        | 0.415 (0.088, 0.742)    |

BAU, antibody binding units; IU, international units; nAb-ID50, 50% inhibitory dilution neutralizing antibody.

Overall VE (95% CI) against the severe-critical, moderate, and moderate to severe-critical endpoints starting 7 days post-D29 through 220 days post-vaccination was 73.1% (58.7%, 84.1%), 41.3% (28.6%, 51.3%), and 48.6% (38.6%, 57.0%), respectively.

Proportion mediated is not a true proportion in that it can take values outside of [0, 1]. Proportion mediated = 1 is equivalent to Non-marker-mediated VE = 0% and Proportion mediated = 0 is equivalent to Non-marker-mediated VE = Overall VE.

**Supplementary Table 20. Mediation effect estimates for participants in Latin America for D29 quantitative markers with 95% confidence intervals.**

Non-marker mediated VE = VE comparing vaccine vs. placebo with antibody marker set to value if assigned placebo.

Marker-mediated VE = VE in vaccinated comparing observed antibody marker vs. hypothetical marker had the participant received placebo.

Prop. mediated = fraction of total risk reduction from vaccine attributed to the antibody marker.

| <b>VE Against Severe-Critical COVID-19</b>             |                                 |                             |                         |
|--------------------------------------------------------|---------------------------------|-----------------------------|-------------------------|
|                                                        | Non-Marker Mediated VE (95% CI) | Marker Mediated VE (95% CI) | Prop. Mediated (95% CI) |
| Spike IgG (BAU/ml)                                     | 0.693 (0.107, 0.895)            | 0.308 (-0.426, 0.664)       | 0.237 (-0.240, 0.714)   |
| RBD IgG (BAU/ml)                                       | 0.710 (0.124, 0.904)            | 0.269 (-0.574, 0.661)       | 0.202 (-0.300, 0.705)   |
| nAb-ID50 (IU50/ml)                                     | 0.666 (0.174, 0.865)            | 0.365 (0.106, 0.549)        | 0.293 (0.018, 0.568)    |
| <b>VE Against Moderate COVID-19</b>                    |                                 |                             |                         |
|                                                        | Non-Marker Mediated VE (95% CI) | Marker Mediated VE (95% CI) | Prop. Mediated (95% CI) |
| Spike IgG (BAU/ml)                                     | -0.022 (-0.654, 0.368)          | 0.282 (-0.123, 0.541)       | 1.07 (-0.505, 2.65)     |
| RBD IgG (BAU/ml)                                       | 0.091 (-0.513, 0.454)           | 0.193 (-0.315, 0.504)       | 0.691 (-0.894, 2.28)    |
| nAb-ID50 (IU50/ml)                                     | 0.173 (-0.220, 0.440)           | 0.113 (-0.229, 0.360)       | 0.387 (-0.684, 1.46)    |
| <b>VE Against Moderate to Severe-Critical COVID-19</b> |                                 |                             |                         |
|                                                        | Non-Marker Mediated VE (95% CI) | Marker Mediated VE (95% CI) | Prop. Mediated (95% CI) |
| Spike IgG (BAU/ml)                                     | 0.178 (-0.371, 0.507)           | 0.280 (-0.130, 0.541)       | 0.625 (-0.271, 1.52)    |
| RBD IgG (BAU/ml)                                       | 0.263 (-0.274, 0.573)           | 0.197 (-0.321, 0.512)       | 0.418 (-0.534, 1.37)    |
| nAb-ID50 (IU50/ml)                                     | 0.339 (-0.051, 0.585)           | 0.104 (-0.307, 0.386)       | 0.209 (-0.516, 0.935)   |

BAU, antibody binding units; IU, international units; nAb-ID50, 50% inhibitory dilution neutralizing antibody In Latin America, overall VE (95% CI) against the severe-critical, moderate, and moderate to severe-critical endpoints starting 7 days post-D29 through 220 days post-vaccination was 72.3% (95% CI 55.9 to 83.6%), 28.4% (95% CI 13.9 to 41.1%), and 38.5% (95% CI 26.7 to 49.0%), respectively. Proportion mediated is not a true proportion in that it can take values outside of [0, 1]. Proportion mediated = 1 is equivalent to Non-marker-mediated VE = 0% and Proportion mediated = 0 is equivalent to Non-marker-mediated VE = Overall VE.

**Supplementary Table 21. Mediation effect estimates for participants in South Africa for D29 quantitative markers with 95% confidence intervals.**

Non-marker mediated VE = VE comparing vaccine vs. placebo with antibody marker set to value if assigned placebo.

Marker-mediated VE = VE in vaccinated comparing observed antibody marker vs. hypothetical marker had the participant received placebo.

Prop. mediated = fraction of total risk reduction from vaccine attributed to the antibody marker.

| <b>VE Against Moderate to Severe-Critical COVID-19</b> |                                 |                             |                         |
|--------------------------------------------------------|---------------------------------|-----------------------------|-------------------------|
|                                                        | Non-Marker Mediated VE (95% CI) | Marker Mediated VE (95% CI) | Prop. Mediated (95% CI) |
| Spike IgG (BAU/ml)                                     | 0.454 (-0.666, 0.821)           | 0.289 (-0.959, 0.742)       | 0.361 (-0.722, 1.44)    |
| RBD IgG (BAU/ml)                                       | 0.276 (-1.01, 0.739)            | 0.464 (-0.311, 0.781)       | 0.659 (-0.345, 1.66)    |
| nAb-ID50 (IU50/ml)                                     | 0.564 (0.158, 0.775)            | 0.109 (-0.379, 0.425)       | 0.122 (-0.344, 0.589)   |

BAU, antibody binding units; IU, international units; nAb-ID50, 50% inhibitory dilution neutralizing antibody.

In South Africa, overall VE (95% CI) against the s moderate to severe-critical endpoint starting 7 days post-D29 through 220 days post-vaccination was 61.2% (95% CI 37.3 to 77.0%). Proportion mediated is not a true proportion in that it can take values outside of [0, 1]. Proportion mediated = 1 is equivalent to Non-marker-mediated VE = 0% and Proportion mediated = 0 is equivalent to Non-marker-mediated VE = Overall VE.

**Supplementary Table 22. Mediation effect estimates for participants in the United States for D29 quantitative markers with 95% confidence intervals.**

Non-marker mediated VE = VE comparing vaccine vs. placebo with antibody marker set to value if assigned placebo.

Marker-mediated VE = VE in vaccinated comparing observed antibody marker vs. hypothetical marker had the participant received placebo.

Prop. mediated = fraction of total risk reduction from vaccine attributed to the antibody marker.

| <b>VE Against Moderate to Severe-Critical COVID-19</b> |                                 |                             |                         |
|--------------------------------------------------------|---------------------------------|-----------------------------|-------------------------|
|                                                        | Non-Marker Mediated VE (95% CI) | Marker Mediated VE (95% CI) | Prop. Mediated (95% CI) |
| Spike IgG (BAU/ml)                                     | 0.256 (-1.14, 0.742)            | 0.524 (-0.117, 0.797)       | 0.715 (-0.240, 1.67)    |
| RBD IgG (BAU/ml)                                       | -0.075 (-3.40, 0.737)           | 0.671 (-0.341, 0.919)       | 1.07 (-0.290, 2.43)     |
| nAb-ID50 (IU50/ml)                                     | 0.559 (0.267, 0.735)            | 0.196 (-0.072, 0.397)       | 0.210 (-0.096, 0.517)   |

BAU, antibody binding units; IU, international units; nAb-ID50, 50% inhibitory dilution neutralizing antibody.

In the United States, overall VE (95% CI) against the s moderate to severe-critical endpoint starting 7 days post-D29 through 220 days post-vaccination was 65.8% (95% CI 55.2 to 75.0%). Proportion mediated is not a true proportion in that it can take values outside of [0, 1]. Proportion mediated = 1 is equivalent to Non-marker-mediated VE = 0% and Proportion mediated = 0 is equivalent to Non-marker-mediated VE = Overall VE.

**Supplementary Table 23. Scorecard for ranking D29 antibody marker performance in the Latin America cohort in each of two categories of immune correlate-quality criteria.**

| Comparison | D29 Marker         | COVID-19 endpoint | Category 1: Correlate of Risk (CoR) |      |                               |      |                         | Category 2: Correlate of Protection (CoP): VE Modification |      |                                        |      |                         |      | Category 3: CoP: VE Modification |                       |      |         |      |                         |
|------------|--------------------|-------------------|-------------------------------------|------|-------------------------------|------|-------------------------|------------------------------------------------------------|------|----------------------------------------|------|-------------------------|------|----------------------------------|-----------------------|------|---------|------|-------------------------|
|            |                    |                   | HR per SD (Cox, quant.)             |      | HR High vs. Low tertile (Cox) |      |                         | Fold-increase in CVE <sup>1</sup> (Cox)                    |      | Fold-increase in CVE <sup>1</sup> (NP) |      | E-val. Marg. RR Pt. Est |      | Proportion mediated              |                       |      |         |      |                         |
|            |                    |                   | Pt. Est. (95% CI)                   | Rank | Pt. Est. (95% CI)             | Rank | <b>Cat. 1 Mean rank</b> | Fold-increase                                              | Rank | Fold-increase                          | Rank | E-val.                  | Rank | <b>Cat. 2 Mean rank</b>          | Pt. Est. (95% CI)     | Rank | 95% LCL | Rank | <b>Cat. 3 Mean rank</b> |
| A          | Spike IgG (BAU/ml) | Sev-crit          | 0.84 (0.56, 1.27)                   | 2    | 0.66 (0.24, 1.82)             | 2    | <b>2</b>                | 1.6                                                        | 2    | 2.4                                    | 1    | 2.4                     | 2    | <b>1.67</b>                      | 0.237 (-0.240, 0.714) | 2    | -0.240  | NA   | <b>2</b>                |
|            | Spike IgG (BAU/ml) | Mod               | 0.83 (0.65, 1.05)                   | 1    | 0.62 (0.35, 1.10)             | 1    | <b>1*</b>               | 1.7                                                        | 1    | 2.0                                    | 2    | 2.5                     | 1    | <b>1.33*</b>                     | 1.07 (-0.505, 2.65)   | 1    | -0.505  | NA   | <b>1*</b>               |
| A          | RBD IgG (BAU/ml)   | Sev-crit          | 0.88 (0.57, 1.37)                   | 2    | 0.56 (0.19, 1.67)             | 1    | <b>1.5*</b>             | 1.4                                                        | 2    | 4.1                                    | 1    | 3.0                     | 1    | <b>1.33*</b>                     | 0.202 (-0.300, 0.705) | 2    | -0.300  | NA   | <b>2</b>                |
|            | RBD IgG (BAU/ml)   | Mod               | 0.78 (0.61, 1.00)                   | 1    | 0.59 (0.33, 1.04)             | 2    | <b>1.5*</b>             | 2.0                                                        | 1    | 1.7                                    | 2    | 2.7                     | 2    | <b>1.67</b>                      | 0.691 (-0.894, 2.28)  | 1    | -0.894  | NA   | <b>1*</b>               |
| A          | nAb-ID50 (IU50/ml) | Sev-crit          | 0.45 (0.24, 0.86)                   | 1    | 0.12 (0.02, 0.57)             | 1    | <b>1*</b>               | 5.6                                                        | 1    | 22.3                                   | 1    | 16.2                    | 1    | <b>1*</b>                        | 0.293 (0.018, 0.568)  | 2    | 0.018   | NA   | <b>2</b>                |
|            | nAb-ID50 (IU50/ml) | Mod               | 0.74 (0.57, 0.95)                   | 2    | 0.43 (0.23, 0.82)             | 2    | <b>2</b>                | 1.9                                                        | 2    | 2.5                                    | 2    | 3.9                     | 2    | <b>2</b>                         | 0.387 (-0.684, 1.46)  | 1    | -0.684  | NA   | <b>1*</b>               |
| B          | Spike IgG (BAU/ml) | Mod to sev-crit   | 0.83 (0.65, 1.04)                   | 3    | 0.62 (0.35, 1.08)             | 3    | <b>3</b>                | 1.7                                                        | 3    | 2.0                                    | 2    | 2.5                     | 3    | <b>2.67</b>                      | 0.625 (-0.271, 1.52)  | 1    | -0.271  | 1    | <b>1*</b>               |
|            | RBD IgG (BAU/ml)   | Mod to sev-crit   | 0.79 (0.62, 1.00)                   | 2    | 0.58 (0.33, 1.02)             | 2    | <b>2</b>                | 1.9                                                        | 2    | 1.8                                    | 3    | 2.8                     | 2    | <b>2.33</b>                      | 0.418 (-0.534, 1.37)  | 2    | -0.534  | 3    | <b>2.5</b>              |
|            | nAb-ID50 (IU50/ml) | Mod to sev-crit   | 0.70 (0.54, 0.91)                   | 1    | 0.39 (0.20, 0.74)             | 1    | <b>1*</b>               | 2.1                                                        | 1    | 3.8                                    | 1    | 4.4                     | 1    | <b>1*</b>                        | 0.209 (-0.516, 0.935) | 3    | -0.516  | 2    | <b>2.5</b>              |
| C          | Spike IgG (BAU/ml) | Sev-crit          | 0.84 (0.56, 1.27)                   | 2    | 0.66 (0.24, 1.82)             | 3    | <b>2.5</b>              | 1.6                                                        | 2    | 2.4                                    | 3    | 2.4                     | 3    | <b>2.67</b>                      | 0.237 (-0.240, 0.714) | 2    | -0.240  | 2    | <b>2</b>                |
|            | RBD IgG (BAU/ml)   | Sev-crit          | 0.88 (0.57, 1.37)                   | 3    | 0.56 (0.19, 1.67)             | 2    | <b>2.5</b>              | 1.4                                                        | 3    | 4.1                                    | 2    | 3.0                     | 2    | <b>2.33</b>                      | 0.202 (-0.300, 0.705) | 3    | -0.300  | 3    | <b>3</b>                |
|            | nAb-ID50 (IU50/ml) | Sev-crit          | 0.45 (0.24, 0.86)                   | 1    | 0.12 (0.02, 0.57)             | 1    | <b>1*</b>               | 5.6                                                        | 1    | 22.3                                   | 1    | 16.2                    | 1    | <b>1*</b>                        | 0.293 (0.018, 0.568)  | 1    | 0.018   | 1    | <b>1*</b>               |

<sup>1</sup>Fold-increase calculated on the [1-VE(unquantifiable or negative)]/[1-VE(90<sup>th</sup> percentile)] scale

\*Antibody marker(s) with the best performance, within each comparison, within each category.

Bold font indicates the three categories of criteria and the mean D29 antibody marker rank within each category.

Baseline covariates adjusted for: Baseline risk score. Maximum failure event time 181 days (moderate COVID-19), 170 days (severe-critical COVID-19), or 181 days (moderate to severe-critical COVID-19) post D29. Cases were counted starting 7 days post D29. All serological assay readouts were expressed in WHO International Standard units (see Methods). The Proportion mediated is not a true proportion in that it can take values outside of the interval [0, 1]. Proportion mediated = 1 is equivalent to Non-marker-mediated VE = 0% and Proportion mediated = 0 is equivalent to Non-marker-mediated VE = Overall VE. BAU, binding antibody units; Cat., category; CI, confidence interval; Comp., comparison; E-val., E-value; HR, hazard ratio; IU, international units; LCL, lower confidence limit; Marg., marginalized; mod., moderate; nAb-ID50, 50% inhibitory dilution neutralizing antibody titer; NP, nonparametric; Pt. Est., point estimate; RR, risk ratio; SD, standard deviation; sev-crit, severe-critical.



**Supplementary Fig. 1. (A)** Relationship between moderate, severe-critical, and moderate to severe-critical COVID-19 cases with the immunogenicity subcohort. **(B)** Phases of the ENSEMBLE trial, timing of Ad26.COVID.S dose and serum sampling, and time period for diagnosis of the moderate, severe-critical, and moderate to severe-critical endpoints, for all regions pooled and for each region separately.

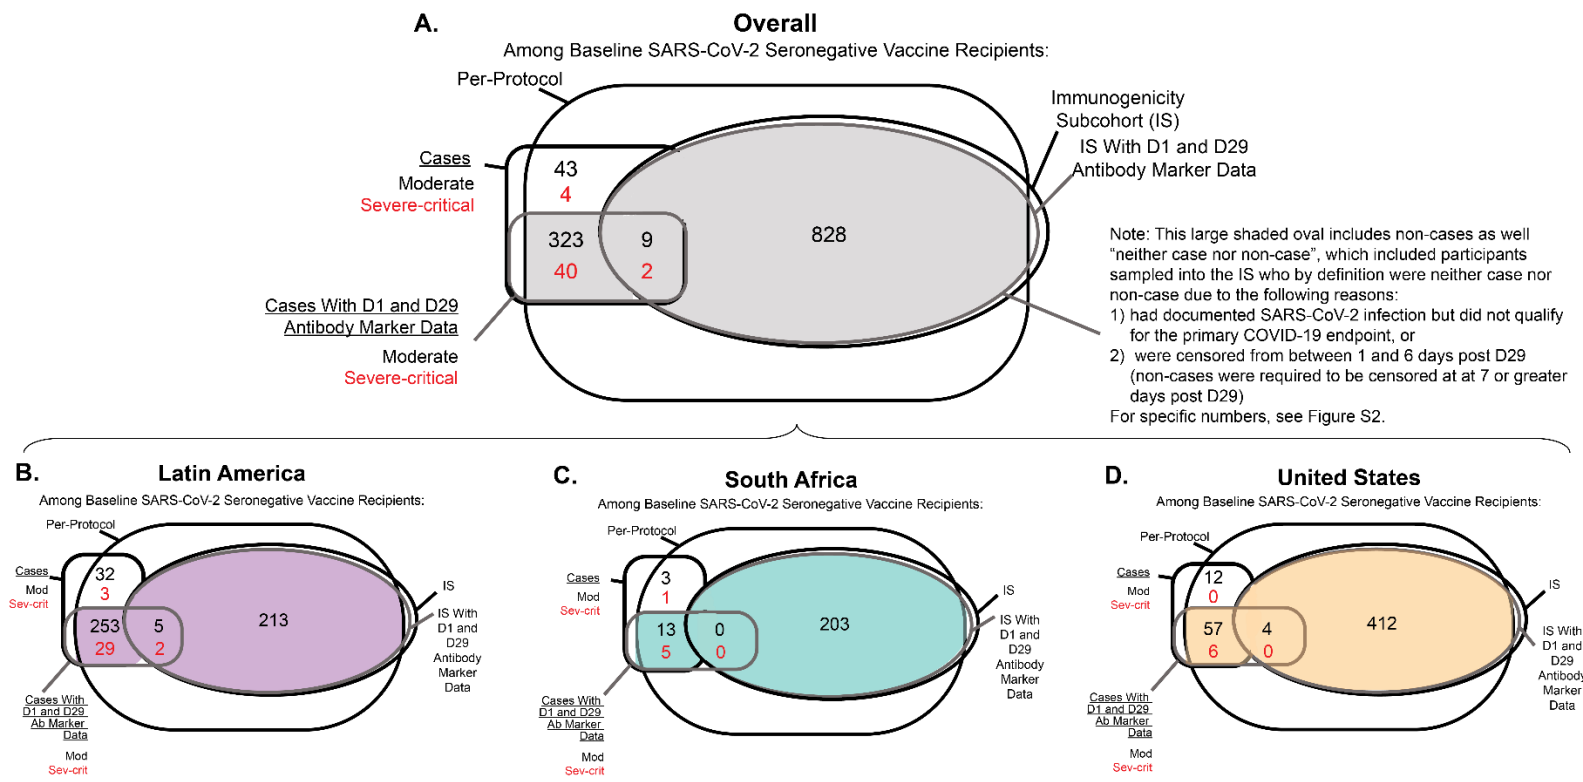

**E.** For baseline SARS-CoV-2 seronegative per-protocol recipients of a single dose of Ad26.COVID.S vaccine:

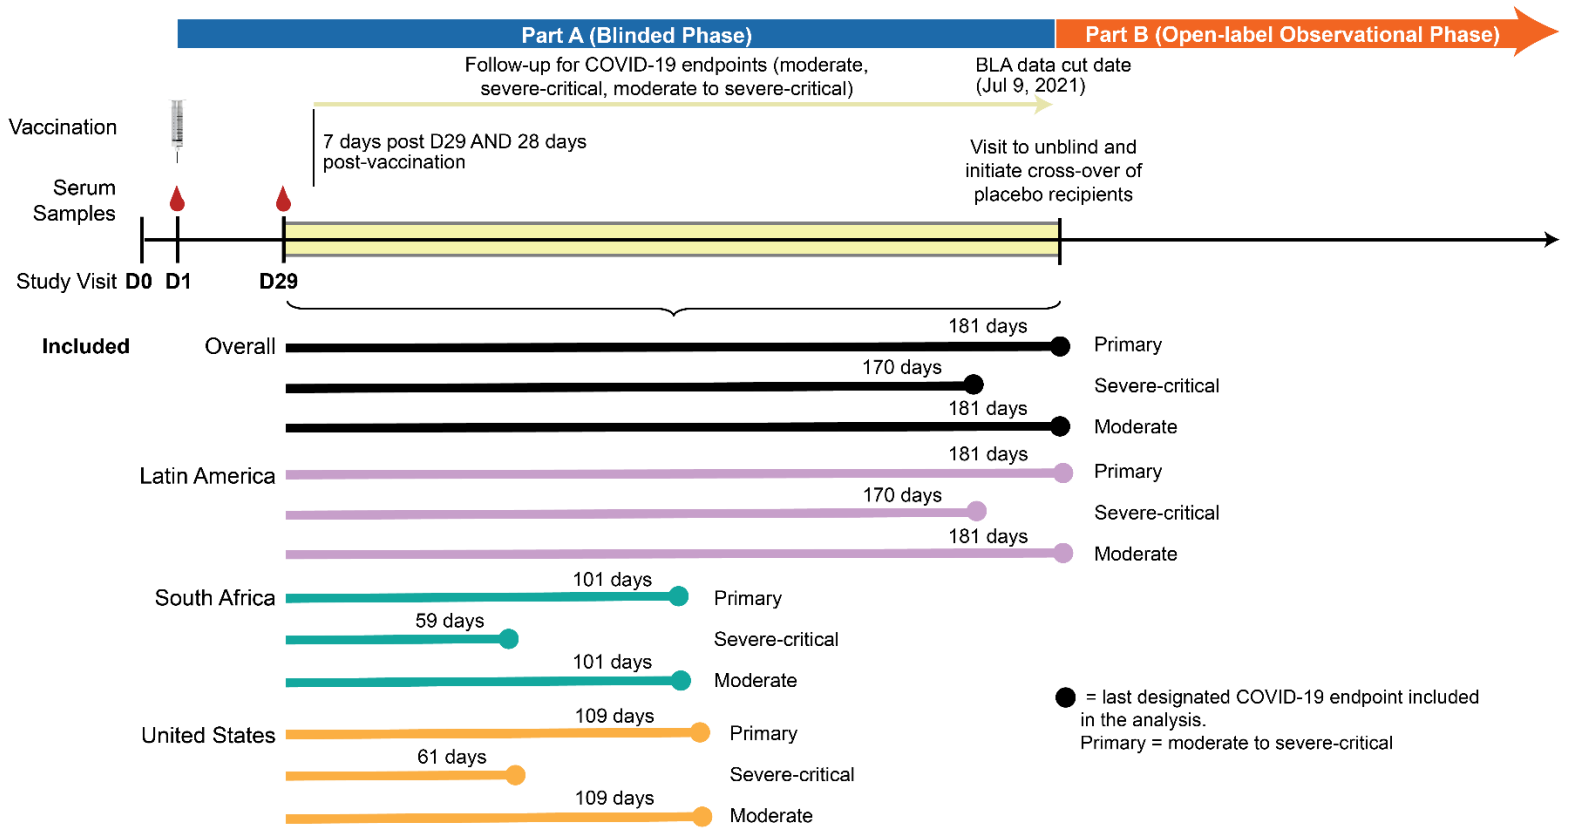

**Supplementary Fig. 2.** Schematic diagram showing participant flow from enrollment to the case-cohort set of baseline SARS-CoV-2 seronegative per-protocol participants.

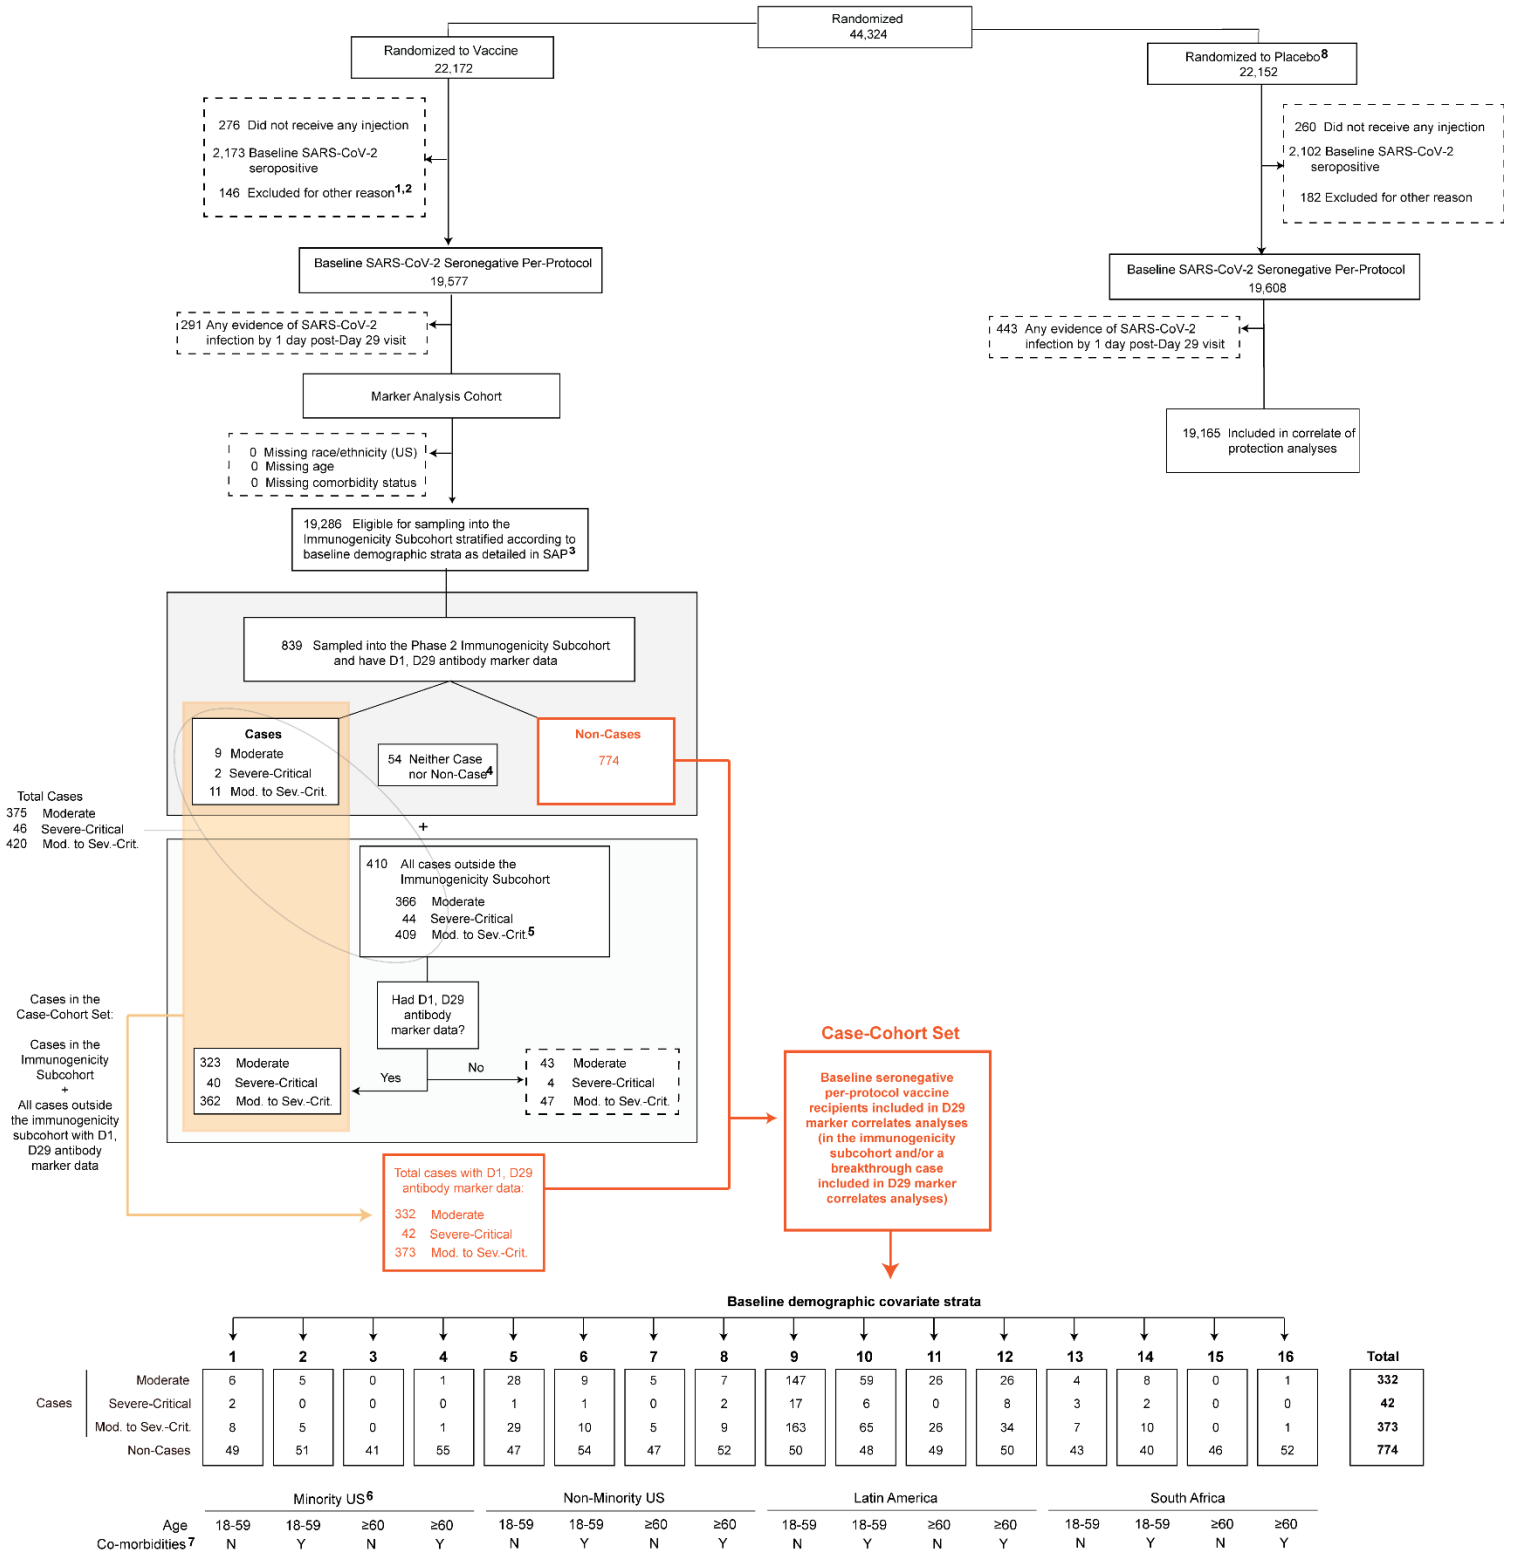

1 Participants could have been excluded for more than one reason.  
 2 Other reasons for exclusion included RT-PCR positive at baseline, violated inclusion or exclusion criteria, received wrong vaccine or incorrect dose, received disallowed concomitant medication, or other.  
 3 See the SAP for details.  
 4 Participants who by definition were neither Case nor Non-Case for the correlates analysis, including participants who had a documented SARS-CoV-2 infection but did not qualify for the primary COVID-19 endpoint, as well as participants who were censored from between 1 and 6 days post D29 (non-cases were required to be censored at 7 or greater days post D29).  
 5 The number of moderate to severe-critical cases (163) is one less than the number of moderate cases (147) plus the number of severe-critical cases (17) due to one participant having two cases at different time points (first a moderate case, and later a severe-critical case; participant in stratum 9).  
 6 Minority is defined as the complement of being known to be White Non-Hispanic. White Non-Hispanic is defined as Race=White and Ethnicity=Not Hispanic or Latino. All other Race subgroups are defined as Black, Asian, American Indian or Alaska Native, Native Hawaiian or Other Pacific Islander, Multiracial, Other, Not reported, or Unknown. (In Latin America, the American Indian or Alaska Native category was labeled as "Indigenous South American".) Minority status was only reported in the U.S.  
 7 Co-morbidities are listed in Table S4 of Sadoff et al. 2021, NEJM and consisted of conditions that have been associated with increased risk of severe COVID-19.  
 8 Placebo recipient ptids are used in the correlate of protection analyses. However, antibody data from the placebo arm are not used in correlates analyses, given no variability in values; they were only used to verify low false positive rates of the immunoassays.

**Supplementary Fig. 3.** SARS-CoV-2 variants causing the severe-critical COVID-19 endpoints, shown by days post-D29 visit of severe-critical COVID-19 occurrence, broken out by geographic region and treatment assignment. Endpoint counts do not require having D1 and D29 antibody marker data (see flowchart Figure S2). As in Sadoff et al.,<sup>3</sup> “Reference” refers to the index strain (GenBank accession number: MN908947.3) harboring the D614G point mutation.

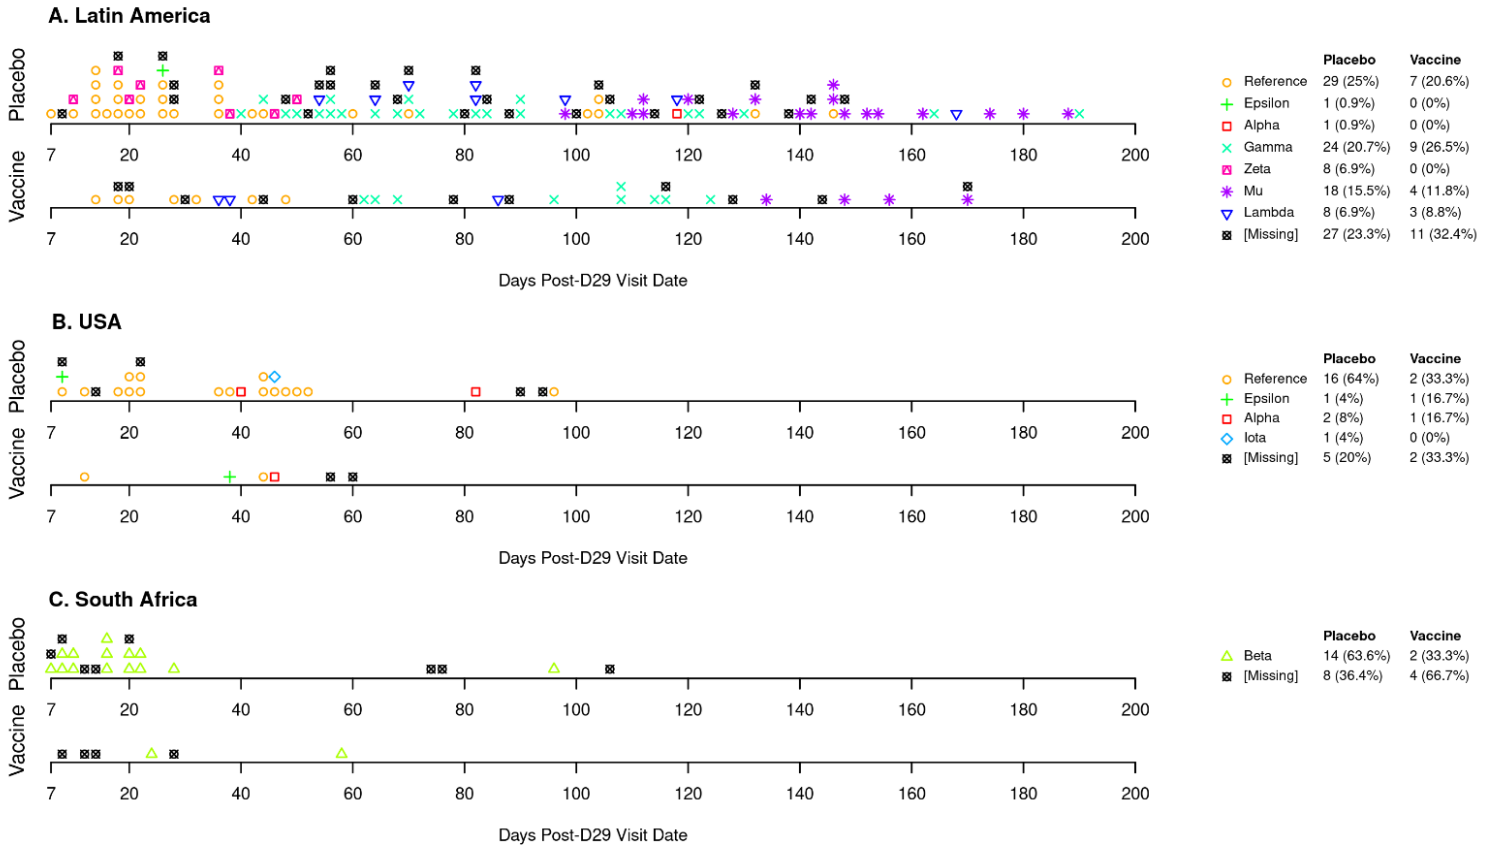

**Supplementary Fig. 4. D29 antibody marker level in participants in Latin America by COVID-19 outcome status (moderate COVID-19 case, severe-critical COVID-19 case, or non-case). (A) Anti-Spike IgG concentration, (B) anti-receptor binding domain (RBD) IgG concentration, and (C) 50% inhibitory dilution neutralizing antibody (nAb-ID50) titer.** Data points are from baseline SARS-CoV-2 seronegative per-protocol vaccine recipients in Latin America. The violin plots contain interior box plots with upper and lower horizontal edges the 25th and 75th percentiles of antibody level and middle line the 50th percentile, and vertical bars the distance from the 25th (or 75th) percentile of antibody level and the minimum (or maximum) antibody level within the 25th (or 75th) percentile of antibody level minus (or plus) 1.5 times the interquartile range. Each side shows a rotated probability density (estimated by a kernel density estimator with a default Gaussian kernel) of the data. Positive response frequencies (Freq) were computed with inverse probability of sampling weighting. Positive response for Spike IgG was defined by IgG > 10.8424 BAU/ml and for RBD IgG was defined by IgG > 14.0858 BAU/ml. ULoQ = 238.1165 BAU/ml for Spike IgG and 172.5755 BAU/ml for RBD IgG. Positive response for nAb-ID50 was defined by a D1 nAb-ID50 titer < LLOQ (LLOQ = 4.8975 IU50/ml) with detectable D29 nAb-ID50 ( $\geq$  LLOQ), or by D1 nAb-ID50 > LLOQ with at least a 4-fold increase in D29 nAb-ID50. ULoQ = 844.7208 IU50/ml for ID50. Moderate COVID-19 cases are baseline SARS-CoV-2 seronegative per-protocol vaccine recipients with the moderate COVID-19 endpoint (moderate COVID-19 with onset both  $\geq$  7 days post D29 and  $\geq$  28 days post-vaccination) up to 181 days post D29 but no later than the data cut (July 9, 2021). Severe-critical COVID-19 cases are baseline SARS-CoV-2 seronegative per-protocol vaccine recipients with the severe-critical COVID-19 endpoint (severe-critical COVID-19 with onset both  $\geq$  7 days post D29 and  $\geq$  28 days post-vaccination) up to 170 days post D29 but no later than the data cut (July 9, 2021). Non-cases are baseline seronegative per-protocol vaccine recipients sampled into the immunogenicity subcohort with no evidence of SARS-CoV-2 infection up to the end of the correlates study period, which is up to 181 days post D29 but no later than the data cut (July 9, 2021). BAU, binding antibody units; IU, international units; LLoQ, lower limit of quantitation; (designated as LoQ on panel C); Pos.Cut, positivity cut-off; ULoQ, upper limit of quantitation.

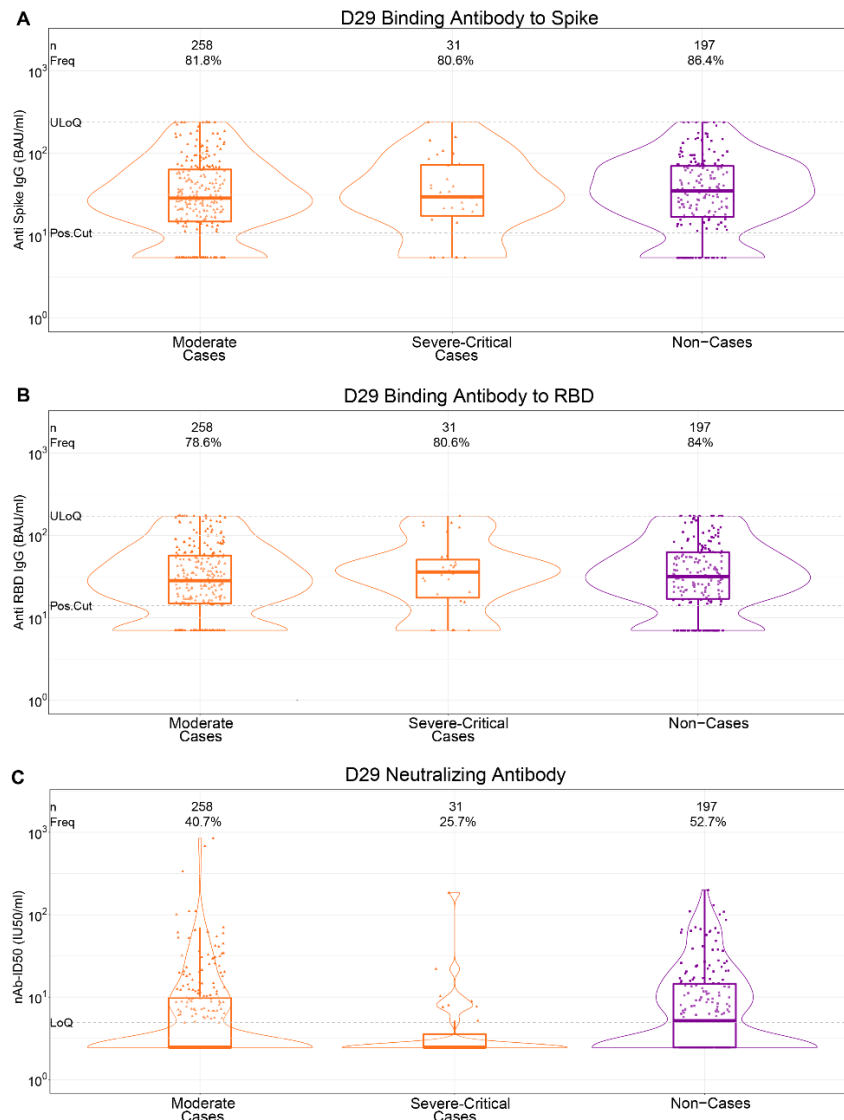

**Supplementary Fig. 5. D29 antibody marker level in participants in South Africa by COVID-19 outcome status (moderate COVID-19 case, severe-critical COVID-19 case, or non-case).** (A) Anti-Spike IgG concentration, (B) anti-receptor binding domain (RBD) IgG concentration, and (C) 50% inhibitory dilution neutralizing antibody (nAb-ID50) titer. Data points are from baseline SARS-CoV-2 seronegative per-protocol vaccine recipients in South Africa. The violin plots contain interior box plots with upper and lower horizontal edges the 25th and 75th percentiles of antibody level and middle line the 50th percentile, and vertical bars the distance from the 25th (or 75th) percentile of antibody level and the minimum (or maximum) antibody level within the 25th (or 75th) percentile of antibody level minus (or plus) 1.5 times the interquartile range. Each side shows a rotated probability density (estimated by a kernel density estimator with a default Gaussian kernel) of the data. Positive response frequencies (Freq) were computed with inverse probability of sampling weighting. Positive response for Spike IgG was defined by IgG > 10.8424 BAU/ml and for RBD IgG was defined by IgG > 14.0858 BAU/ml. ULoQ = 238.1165 BAU/ml for Spike IgG and 172.5755 BAU/ml for RBD IgG. Positive response for nAb-ID50 was defined by a D1 nAb-ID50 titer < LLOQ (LLOQ = 4.8975 IU50/ml) with detectable D29 nAb-ID50 ( $\geq$  LLOQ), or by D1 nAb-ID50 > LLOQ with at least a 4-fold increase in D29 nAb-ID50. ULoQ = 844.7208 IU50/ml for ID50. Moderate COVID-19 cases are baseline SARS-CoV-2 seronegative per-protocol vaccine recipients with the moderate COVID-19 endpoint (moderate COVID-19 with onset both  $\geq$  7 days post D29 and  $\geq$  28 days post-vaccination) up to 101 days post D29 but no later than the data cut (July 9, 2021). Severe-critical COVID-19 cases are baseline SARS-CoV-2 seronegative per-protocol vaccine recipients with the severe-critical COVID-19 endpoint (severe-critical COVID-19 with onset both  $\geq$  7 days post D29 and  $\geq$  28 days post-vaccination) up to 59 days post D29 but no later than the data cut (July 9, 2021). Non-cases are baseline seronegative per-protocol vaccine recipients sampled into the immunogenicity subcohort with no evidence of SARS-CoV-2 infection up to the end of the correlates study period, which is up to 101 days post D29 but no later than the data cut (July 9, 2021). BAU, binding antibody units; IU, international units; LLOQ, lower limit of quantitation (designated as LoQ on panel C); Pos.Cut, positivity cut-off; ULoQ, upper limit of quantitation.

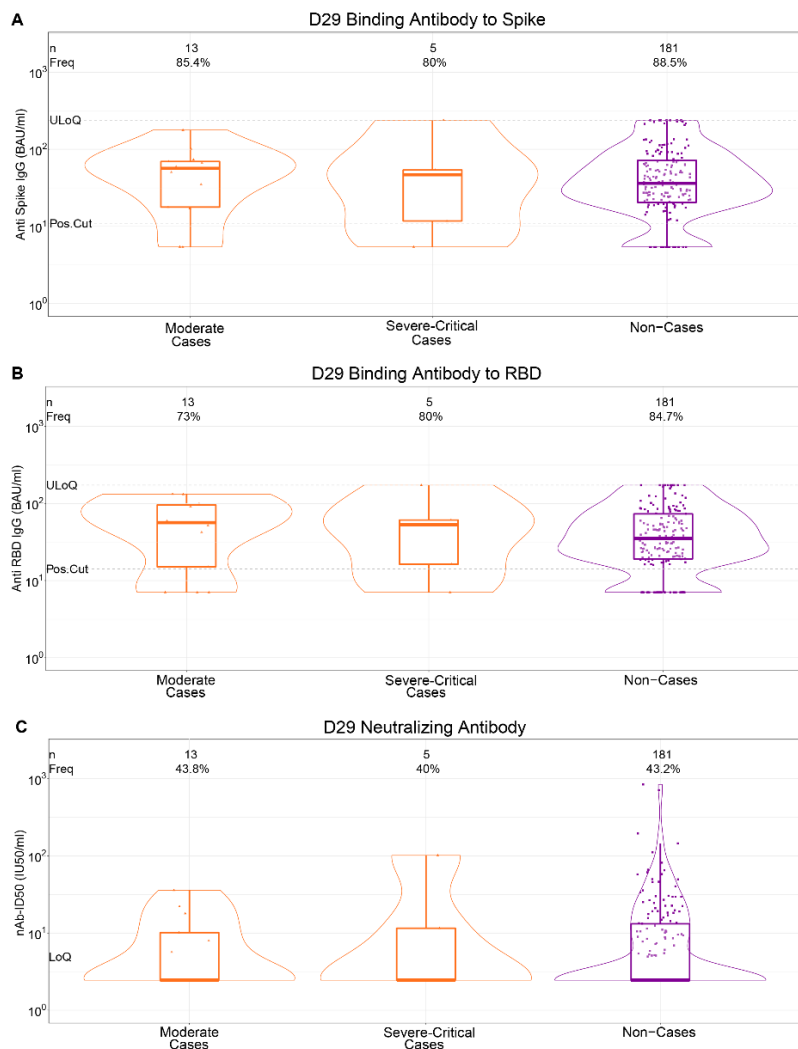

**Supplementary Fig. 6. D29 antibody marker level in participants in the United States by COVID-19 outcome status (moderate COVID-19 case, severe-critical COVID-19 case, or non-case). (A) Anti-Spike IgG concentration, (B) anti-receptor binding domain (RBD) IgG concentration, and (C) 50% inhibitory dilution neutralizing antibody (nAb-ID50) titer.** Data points are from baseline SARS-CoV-2 seronegative per-protocol vaccine recipients in the United States. The violin plots contain interior box plots with upper and lower horizontal edges the 25th and 75th percentiles of antibody level and middle line the 50th percentile, and vertical bars the distance from the 25th (or 75th) percentile of antibody level and the minimum (or maximum) antibody level within the 25th (or 75th) percentile of antibody level minus (or plus) 1.5 times the interquartile range. Each side shows a rotated probability density (estimated by a kernel density estimator with a default Gaussian kernel) of the data. Positive response frequencies (Freq) were computed with inverse probability of sampling weighting. Positive response for Spike IgG was defined by IgG > 10.8424 BAU/ml and for RBD IgG was defined by IgG > 14.0858 BAU/ml. ULoQ = 238.1165 BAU/ml for Spike IgG and 172.5755 BAU/ml for RBD IgG. Positive response for nAb-ID50 was defined by a D1 nAb-ID50 titer < LLOQ (LLOQ = 4.8975 IU50/ml) with detectable D29 nAb-ID50 ( $\geq$  LLOQ), or by D1 nAb-ID50 > LLOQ with at least a 4-fold increase in D29 nAb-ID50. ULoQ = 844.7208 IU50/ml for ID50. Moderate COVID-19 cases are baseline SARS-CoV-2 seronegative per-protocol vaccine recipients with the moderate COVID-19 endpoint (moderate COVID-19 with onset both  $\geq$  7 days post D29 and  $\geq$  28 days post-vaccination) up to 109 days post D29 but no later than the data cut (July 9, 2021). Severe-critical COVID-19 cases are baseline SARS-CoV-2 seronegative per-protocol vaccine recipients with the severe-critical COVID-19 endpoint (severe-critical COVID-19 with onset both  $\geq$  7 days post D29 and  $\geq$  28 days post-vaccination) up to 61 days post D29 but no later than the data cut (July 9, 2021). Non-cases are baseline seronegative per-protocol vaccine recipients sampled into the immunogenicity subcohort with no evidence of SARS-CoV-2 infection up to the end of the correlates study period, which is up to 109 days post D29 but no later than the data cut (July 9, 2021). BAU, binding antibody units; IU, international units; LLOQ, lower limit of quantitation (designated as LoQ on panel C); Pos.Cut, positivity cut-off; ULoQ, upper limit of quantitation.

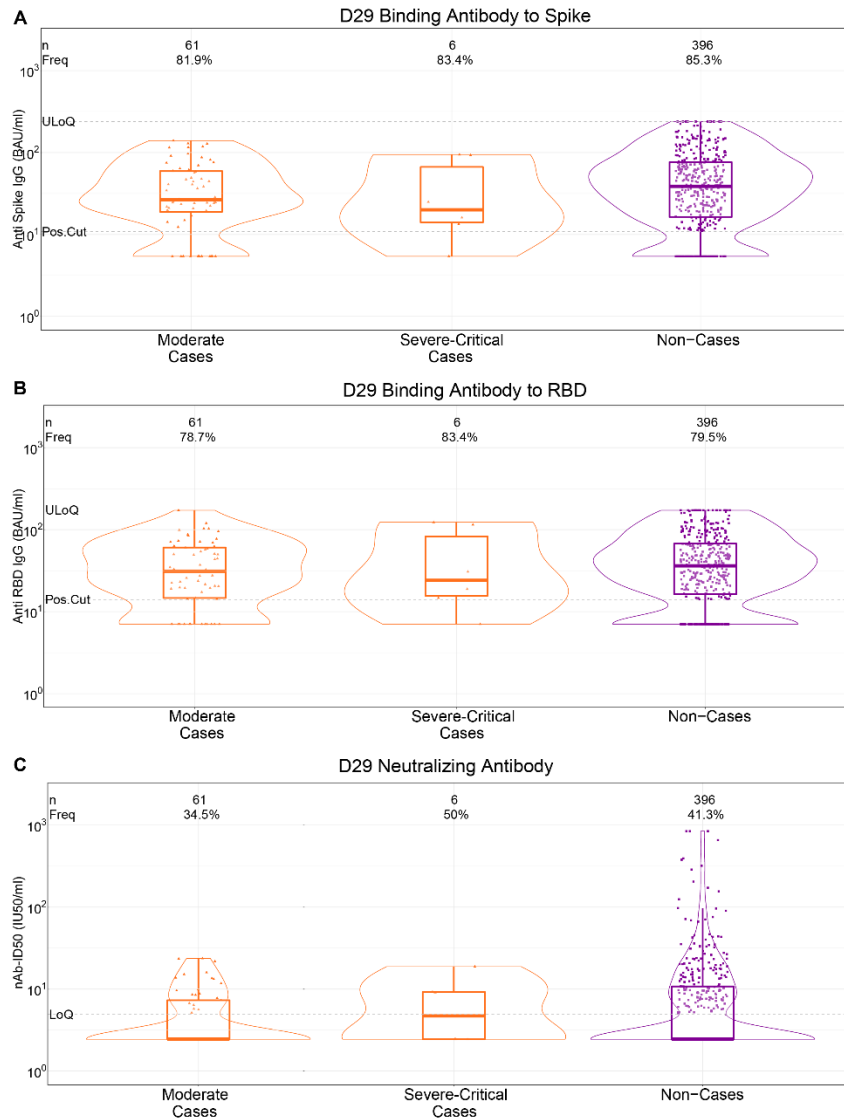

**Supplementary Fig. 7. D29 antibody marker level by COVID-19 outcome status (moderate COVID-19 case, severe-critical COVID-19 case, or non-case) in placebo recipients.** (A) Anti-Spike IgG concentration, (B) anti-receptor binding domain (RBD) IgG concentration, and (C) 50% inhibitory dilution neutralizing antibody (nAb-ID50) titer. Data points are from baseline SARS-CoV-2 seronegative per-protocol placebo recipients. The violin plots contain interior box plots with upper and lower horizontal edges the 25th and 75th percentiles of antibody level and middle line the 50th percentile, and vertical bars the distance from the 25th (or 75th) percentile of antibody level and the minimum (or maximum) antibody level within the 25th (or 75th) percentile of antibody level minus (or plus) 1.5 times the interquartile range. Each side shows a rotated probability density (estimated by a kernel density estimator with a default Gaussian kernel) of the data. Positive response frequencies (Freq) were computed with inverse probability of sampling weighting. Positive response for Spike IgG was defined by IgG > 10.8424 BAU/ml and for RBD IgG was defined by IgG > 14.0858 BAU/ml. ULoQ = 238.1165 BAU/ml for Spike IgG and 172.5755 BAU/ml for RBD IgG. Positive response for nAb-ID50 was defined by a D1 nAb-ID50 titer < LLOQ (LLOQ = 4.8975 IU50/ml) with detectable D29 nAb-ID50 ( $\geq$  LLOQ), or by D1 nAb-ID50 > LLOQ with at least a 4-fold increase in D29 nAb-ID50. ULoQ = 844.7208 IU50/ml for ID50. Moderate COVID-19 cases are baseline SARS-CoV-2 seronegative per-protocol vaccine recipients with the moderate COVID-19 endpoint (moderate COVID-19 with onset both  $\geq$  7 days post D29 and  $\geq$  28 days post-vaccination) up to 181 days post D29 but no later than the data cut (July 9, 2021). Severe-critical COVID-19 cases are baseline SARS-CoV-2 seronegative per-protocol vaccine recipients with the severe-critical COVID-19 endpoint (severe-critical COVID-19 with onset both  $\geq$  7 days post D29 and  $\geq$  28 days post-vaccination) up to 170 days post D29 but no later than the data cut (July 9, 2021). Non-cases are baseline seronegative per-protocol vaccine recipients sampled into the immunogenicity subcohort with no evidence of SARS-CoV-2 infection up to the end of the correlates study period, which is up to 181 days post D29 but no later than the data cut (July 9, 2021). BAU, binding antibody units; IU, international units; LLoQ, lower limit of quantitation (designated as LoQ on panel C); Pos.Cut, positivity cut-off; ULoQ, upper limit of quantitation.

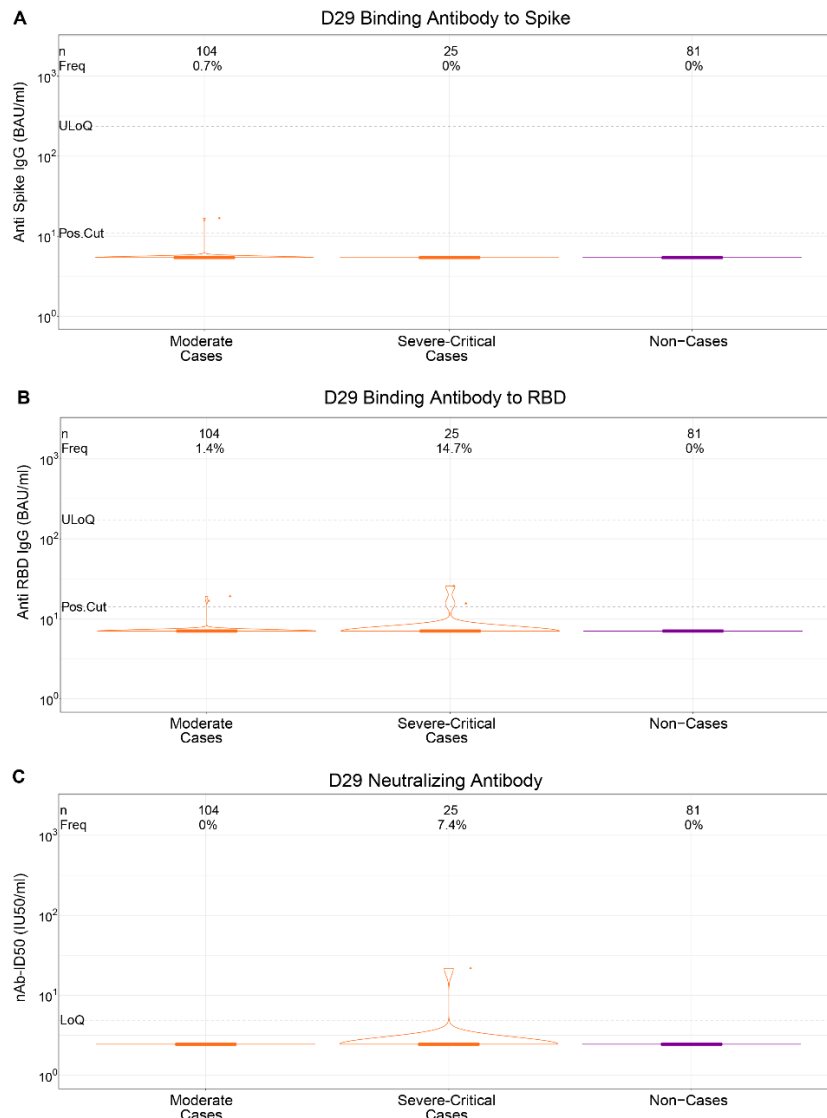

**Supplementary Fig. 8. D29 (A) Anti-Spike IgG concentration, (B) anti-RBD IgG concentration, and (C) 50% inhibitory dilution neutralizing antibody titer (nAb-ID50), shown separately by sex (male, female), in baseline SARS-CoV-2 seronegative vaccine recipients in the immunogenicity subcohort.**

In (A) and (B), the three dotted lines from top to bottom are: upper limit of quantitation (238.1165 BAU/ml for Spike IgG and 172.5755 BAU/ml for RBD IgG), positivity cut-off (10.8424 BAU/ml for Spike IgG and 14.0858 BAU/ml for RBD IgG), and lower limit of quantitation (1.8429 BAU/ml for Spike IgG and 5.0243 for RBD IgG). BAU, binding antibody units; IU, international units. In (C), the two dotted lines from top to bottom are: upper limit of quantitation (844.7208 IU50/ml), lower limit of quantitation (4.8975 IU50/ml).

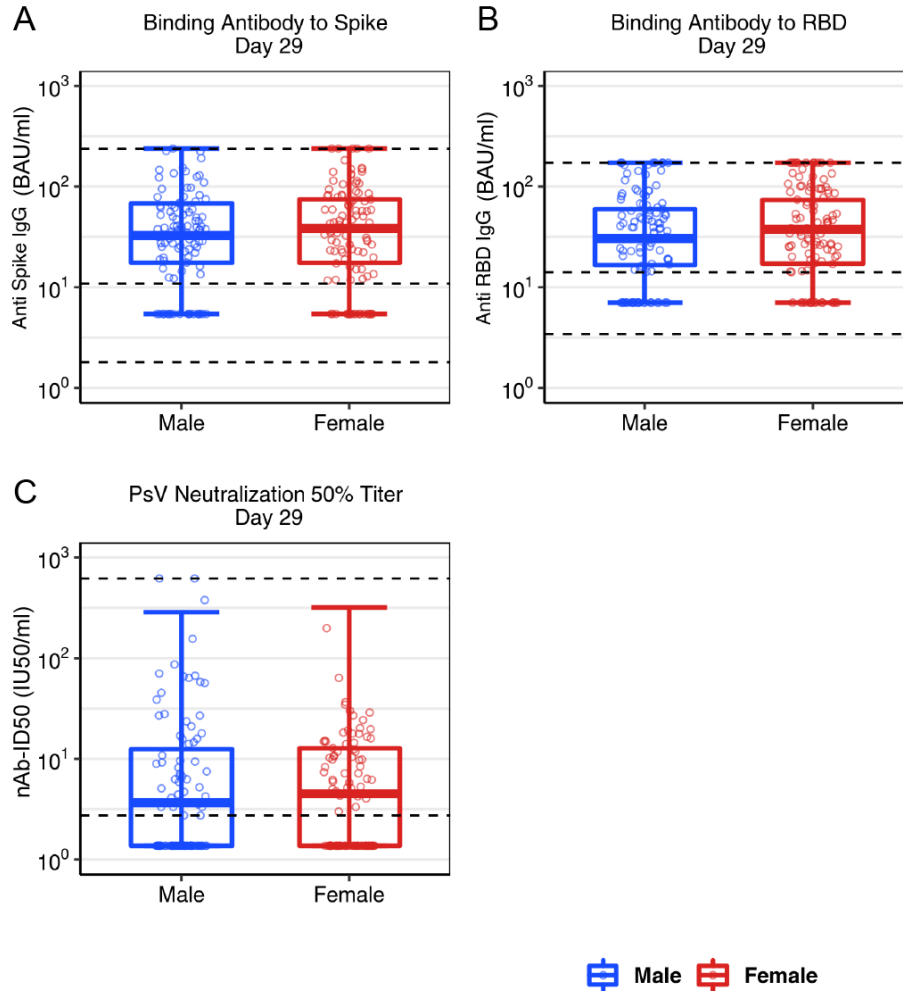



**Supplementary Fig. 9. Severe-critical COVID-19 risk by D29 antibody marker tertile. (A-C)**

Covariate-adjusted cumulative incidence of severe-critical COVID-19 by Low, Medium, and High tertiles of D29 (A) anti-Spike IgG concentration, (B) anti-RBD IgG concentration, or (C) neutralizing antibody titer (nAb-ID50) in baseline SARS-CoV-2–negative per-protocol vaccine recipients. (D) Covariate-adjusted hazard ratio of severe-critical COVID-19 across D29 antibody marker tertiles. Endpoint counts for (A-C) calculated by inverse probability of sampling D29 marker weighting. The overall p value is from a generalized Wald test of whether the hazard rate of severe-critical COVID-19 differed across the Low, Medium, and High subgroups. Analyses adjusted for baseline behavioral risk score and geographic region. BAU, binding antibody units; CI, confidence interval; FDR, false discovery rate; FWER, family-wise error rate; IU, international units; nAb-ID50, 50% inhibitory dilution neutralizing antibody; Pt. Est., point estimate.

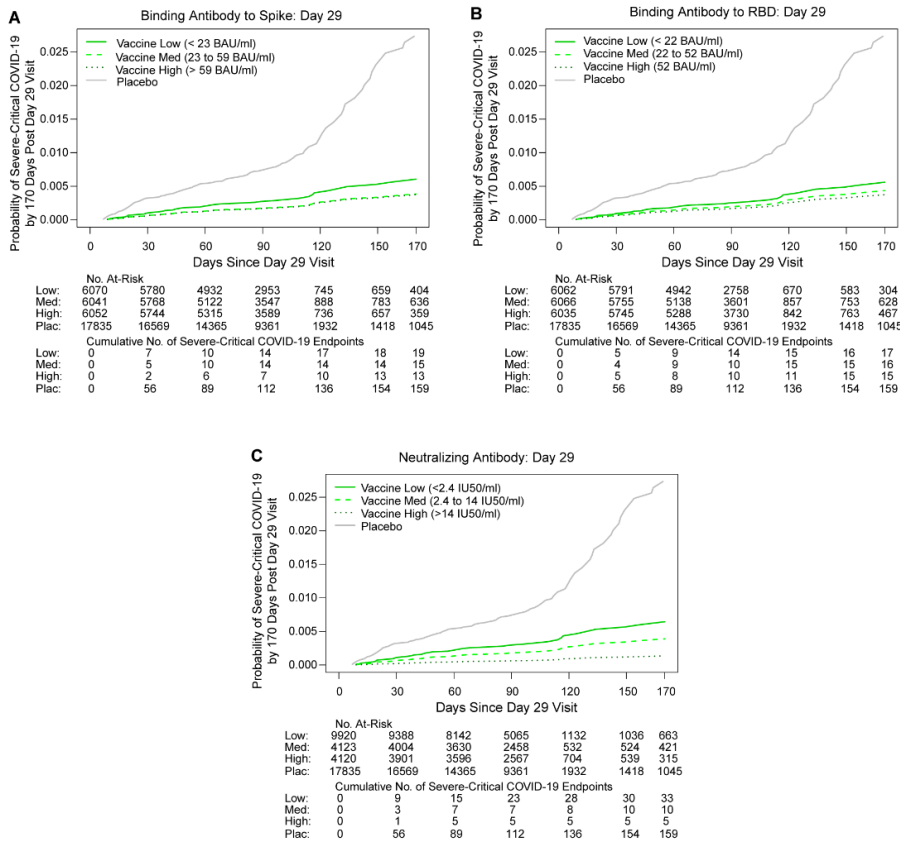

\*No. At-Risk = estimated number in the population for analysis: baseline seronegative per-protocol vaccine recipients not experiencing the severe-critical COVID-19 endpoint or with any evidence of infection through D29.  
 \*\*Cumulative No. of Severe-Critical COVID-19 Endpoints = estimated cumulative number of this cohort with a severe-critical COVID-19 endpoint.

**D**

| D29 Immunologic Marker  | Tertile | No. cases / No. at-risk <sup>§</sup> | Attack rate | Haz. Ratio Pt. Est. | 95% CI       | P-value (2-sided) | Overall P-value | FDR-adjusted P-value <sup>†</sup> | FWER-adjusted P-value <sup>†</sup> |
|-------------------------|---------|--------------------------------------|-------------|---------------------|--------------|-------------------|-----------------|-----------------------------------|------------------------------------|
| Anti Spike IgG (BAU/ml) | Low     | 19/6,070                             | 0.0031      | 1                   | N/A          | N/A               | 0.411           | 0.633                             | 0.723                              |
|                         | Medium  | 15/6,041                             | 0.0025      | 0.63                | (0.28, 1.43) | 0.271             |                 |                                   |                                    |
|                         | High    | 13/6,052                             | 0.0021      | 0.62                | (0.27, 1.42) | 0.254             |                 |                                   |                                    |
| Anti RBD IgG (BAU/ml)   | Low     | 17/6,062                             | 0.0028      | 1                   | N/A          | N/A               | 0.632           | 0.633                             | 0.793                              |
|                         | Medium  | 16/6,066                             | 0.0026      | 0.78                | (0.35, 1.73) | 0.534             |                 |                                   |                                    |
|                         | High    | 15/6,035                             | 0.0025      | 0.67                | (0.28, 1.57) | 0.352             |                 |                                   |                                    |
| nAb-ID50 (IU50/ml)      | Low     | 33/9,920                             | 0.0033      | 1                   | N/A          | N/A               | 0.025           | 0.106                             | 0.087                              |
|                         | Medium  | 10/4,123                             | 0.0024      | 0.60                | (0.26, 1.42) | 0.247             |                 |                                   |                                    |
|                         | High    | 5/4,120                              | 0.0012      | 0.21                | (0.07, 0.67) | 0.008             |                 |                                   |                                    |
| Placebo                 |         | 163/17,835                           | 0.0091      |                     |              |                   |                 |                                   |                                    |

Baseline covariates adjusted for: baseline risk score, geographic region, RBD, receptor binding domain; ID50, 50% inhibitory dilution titer.

<sup>§</sup> No. at-risk = estimated number in the population for analysis, i.e. baseline SARS-CoV-2 seronegative per-protocol vaccine recipients not experiencing the severe-critical COVID-19 endpoint or with evidence of SARS-CoV-2 infection through D29; no. cases = numbers of this cohort with an observed severe-critical COVID-19 endpoint (with onset ≥ 7 days post D29 and ≥ 28 days post vaccination).

<sup>†</sup> q-value and FWER (family-wise error rate) are computed over the set of p-values both for quantitative markers and categorical markers using the Westfall and Young permutation method (10000 replicates).

**Supplementary Fig. 10. Moderate COVID-19 risk by D29 antibody marker tertile. (A-C)** Covariate-adjusted cumulative incidence of moderate COVID-19 by Low, Medium, and High tertiles of D29 (A) anti-Spike IgG concentration, (B) anti-RBD IgG concentration, or (C) neutralizing antibody titer (nAb-ID50) in baseline SARS-CoV-2–negative per-protocol vaccine recipients. (D) Covariate-adjusted hazard ratio of moderate COVID-19 across D29 antibody marker tertiles. Endpoint counts for (A-C) calculated by inverse probability of sampling D29 marker weighting. The overall p value is from a generalized Wald test of whether the hazard rate of moderate COVID-19 differed across the Low, Medium, and High subgroups. Analyses adjusted for baseline behavioral risk score and geographic region. BAU, binding antibody units; CI, confidence interval; FDR, false discovery rate; FWER, family-wise error rate; IU, international units; nAb-ID50, 50% inhibitory dilution neutralizing antibody; Pt. Est., point estimate.

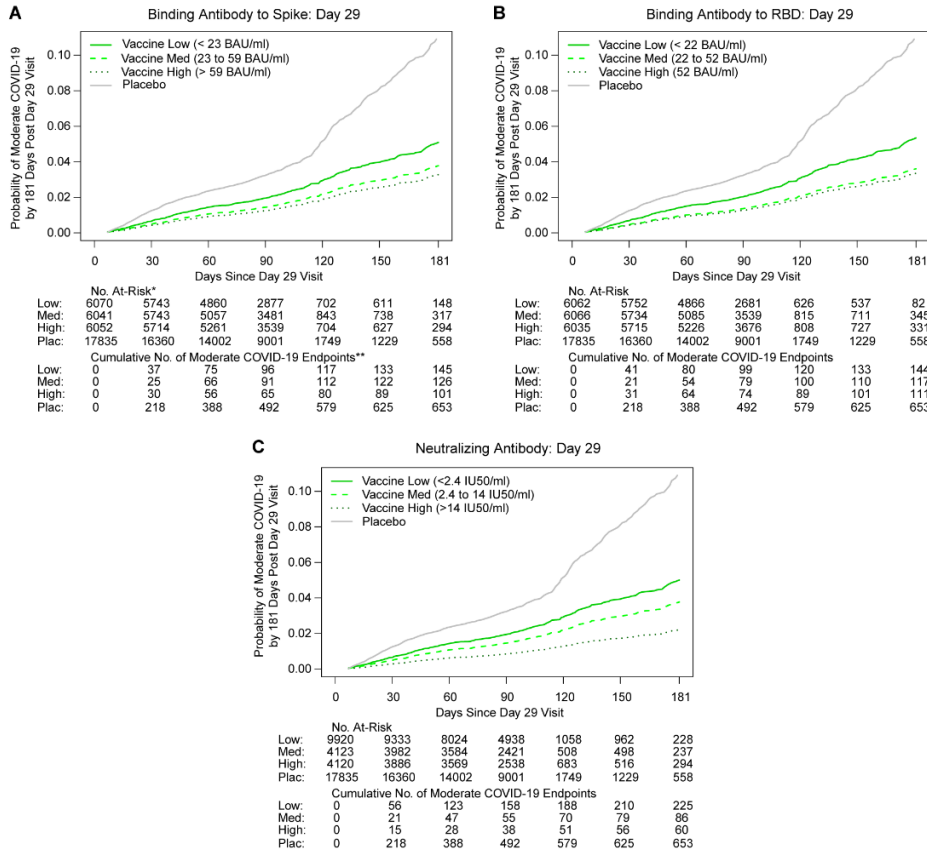

\*No. At-Risk = estimated number in the population for analysis: baseline seronegative per-protocol vaccine recipients not experiencing the moderate COVID-19 endpoint or with any evidence of infection through D29.

\*\*Cumulative No. of Moderate COVID-19 Endpoints = estimated cumulative number of this cohort with a moderate COVID-19 endpoint.

**D**

| D29 Immunologic Marker  | Tertile | No. cases / No. at-risk <sup>§</sup> | Attack rate | Haz. Ratio Pt. Est. | P-value 95% CI | Overall P-value | FDR-adjusted P-value <sup>†</sup> | FWER-adjusted P-value <sup>†</sup> |
|-------------------------|---------|--------------------------------------|-------------|---------------------|----------------|-----------------|-----------------------------------|------------------------------------|
| Anti Spike IgG (BAU/ml) | Low     | 145/6,070                            | 0.0239      | 1                   | N/A            | N/A             | 0.142                             | 0.169                              |
|                         | Medium  | 127/6,041                            | 0.0210      | 0.73                | (0.46, 1.16)   | 0.188           |                                   |                                    |
|                         | High    | 102/6,052                            | 0.0169      | 0.64                | (0.40, 1.01)   | 0.057           |                                   |                                    |
| Anti RBD IgG (BAU/ml)   | Low     | 144/6,062                            | 0.0238      | 1                   | N/A            | N/A             | 0.085                             | 0.122                              |
|                         | Medium  | 118/6,066                            | 0.0195      | 0.67                | (0.42, 1.05)   | 0.079           |                                   |                                    |
|                         | High    | 112/6,035                            | 0.0186      | 0.62                | (0.39, 0.99)   | 0.047           |                                   |                                    |
| nAb-ID50 (IU50/ml)      | Low     | 225/9,920                            | 0.0227      | 1                   | N/A            | N/A             | 0.012                             | 0.054                              |
|                         | Medium  | 88/4,123                             | 0.0213      | 0.75                | (0.46, 1.21)   | 0.231           |                                   |                                    |
|                         | High    | 61/4,120                             | 0.0148      | 0.43                | (0.25, 0.75)   | 0.003           |                                   |                                    |
| Placebo                 |         | 657/17,835                           | 0.0368      |                     |                |                 |                                   |                                    |

Baseline covariates adjusted for: baseline risk score, geographic region. RBD, receptor binding domain; ID50, 50% inhibitory dilution titer.

<sup>§</sup> No. at-risk = estimated number in the population for analysis, i.e. baseline SARS-CoV-2 seronegative per-protocol vaccine recipients not experiencing the moderate COVID-19 endpoint or with evidence of SARS-CoV-2 infection through D29; no. cases = numbers of this cohort with an observed moderate COVID-19 endpoint (with onset  $\geq 7$  days post D29 and  $\geq 28$  days post vaccination).

<sup>†</sup> q-value and FWER (family-wise error rate) are computed over the set of p-values both for quantitative markers and categorical markers using the Westfall and Young permutation method (10000 replicates).

**Supplementary Fig. 11. Moderate to severe-critical COVID-19 risk by D29 antibody marker tertile.** (A-C) Covariate-adjusted cumulative incidence of moderate to severe-critical COVID-19 by Low, Medium, and High tertiles of D29 (A) anti-Spike IgG concentration, (B) anti-RBD IgG concentration, or (C) neutralizing antibody titer (nAb-ID50) in baseline SARS-CoV-2-seronegative per-protocol vaccine recipients. (D) Covariate-adjusted hazard ratio of moderate to severe-critical COVID-19 across D29 antibody marker tertiles. Endpoint counts for (A-C) calculated by inverse probability of sampling D29 marker weighting. The overall p value is from a generalized Wald test of whether the hazard rate of moderate to severe-critical COVID-19 differed across the Low, Medium, and High subgroups. Analyses adjusted for baseline behavioral risk score and geographic region. BAU, binding antibody units; CI, confidence interval; FDR, false discovery rate; FWER, family-wise error rate; IU, international units; nAb-ID50, 50% inhibitory dilution neutralizing antibody; Pt. Est., point estimate.

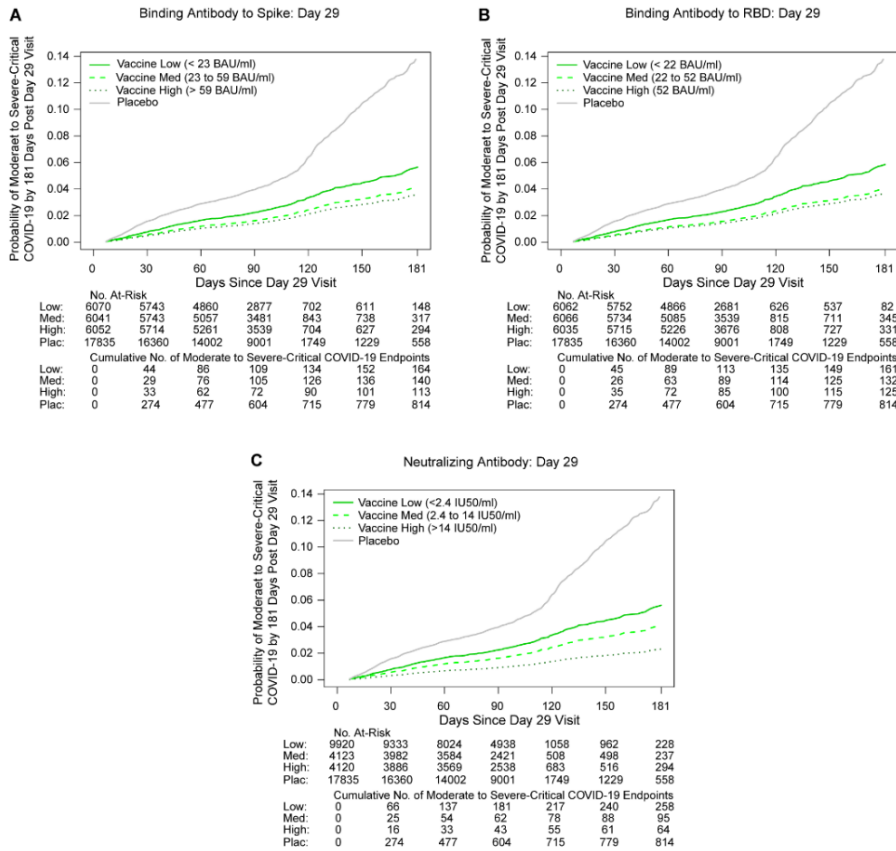

\*No. At-Risk = estimated number in the population for analysis: baseline seronegative per-protocol vaccine recipients not experiencing the moderate to severe-critical COVID-19 endpoint or with any evidence of infection through D29.  
 \*\*Cumulative No. of Moderate to Severe-Critical COVID-19 Endpoints = estimated cumulative number of this cohort with a moderate to severe-critical COVID-19 endpoint.

**D**

| D29 Immunologic Marker  | Tertile | No. cases / No. at-risk <sup>§</sup> | Attack rate | Haz. Ratio Pt. Est. | 95% CI       | P-value (2-sided) | Overall P-value | FDR-adjusted P-value <sup>†</sup> | FWER-adjusted P-value <sup>†</sup> |
|-------------------------|---------|--------------------------------------|-------------|---------------------|--------------|-------------------|-----------------|-----------------------------------|------------------------------------|
| Anti Spike IgG (BAU/ml) | Low     | 164/6,070                            | 0.0270      | 1                   | N/A          | N/A               | 0.112           | 0.156                             | 0.204                              |
|                         | Medium  | 142/6,041                            | 0.0235      | 0.72                | (0.46, 1.13) | 0.156             |                 |                                   |                                    |
|                         | High    | 115/6,052                            | 0.0190      | 0.63                | (0.40, 0.99) | 0.045             |                 |                                   |                                    |
| Anti RBD IgG (BAU/ml)   | Low     | 161/6,062                            | 0.0266      | 1                   | N/A          | N/A               | 0.081           | 0.138                             | 0.185                              |
|                         | Medium  | 134/6,066                            | 0.0221      | 0.68                | (0.44, 1.05) | 0.085             |                 |                                   |                                    |
|                         | High    | 126/6,035                            | 0.0209      | 0.62                | (0.39, 0.98) | 0.042             |                 |                                   |                                    |
| nAb-ID50 (IU50/ml)      | Low     | 258/9,920                            | 0.0260      | 1                   | N/A          | N/A               | 0.005           | 0.026                             | 0.026                              |
|                         | Medium  | 97/4,123                             | 0.0235      | 0.72                | (0.45, 1.15) | 0.172             |                 |                                   |                                    |
|                         | High    | 65/4,120                             | 0.0158      | 0.40                | (0.23, 0.69) | 0.001             |                 |                                   |                                    |
| Placebo                 |         | 820/17,835                           | 0.0460      |                     |              |                   |                 |                                   |                                    |

Baseline covariates adjusted for: baseline risk score, geographic region. RBD, receptor binding domain; ID50, 50% inhibitory dilution titer.  
<sup>§</sup> No. at-risk = estimated number in the population for analysis, i.e. baseline SARS-CoV-2 seronegative per-protocol vaccine recipients not experiencing the moderate to severe-critical COVID-19 endpoint or with evidence of SARS-CoV-2 infection through D29; no. cases = numbers of this cohort with an observed moderate to severe-critical COVID-19 endpoint (with onset  $\geq 7$  days post D29 and  $\geq 28$  days post vaccination).  
<sup>†</sup> q-value and FWER (family-wise error rate) are computed over the set of p-values both for quantitative markers and categorical markers using the Westfall and Young permutation method (10000 replicates).

**Supplementary Fig. 12. Severe-critical COVID-19 risk by D29 antibody marker tertile in participants in Latin America. (A-C)** Covariate-adjusted cumulative incidence of severe-critical COVID-19 by Low, Medium, and High tertiles of D29 (A) anti-Spike IgG concentration, (B) anti-RBD IgG concentration, or (C) neutralizing antibody titer (nAb-ID50) in baseline SARS-CoV-2-seronegative per-protocol vaccine recipients in Latin America. (D) Covariate-adjusted hazard ratio of severe-critical COVID-19 across D29 antibody marker tertiles. Endpoint counts for (A-C) calculated by inverse probability of sampling D29 marker weighting. The overall p value is from a generalized Wald test of whether the hazard rate of severe-critical COVID-19 differed across the Low, Medium, and High subgroups. Analyses adjusted for baseline behavioral risk score. BAU, binding antibody units; CI, confidence interval; FDR, false discovery rate; FWER, family-wise error rate; IU, international units; nAb-ID50, 50% inhibitory dilution neutralizing antibody; Pt. Est., point estimate.

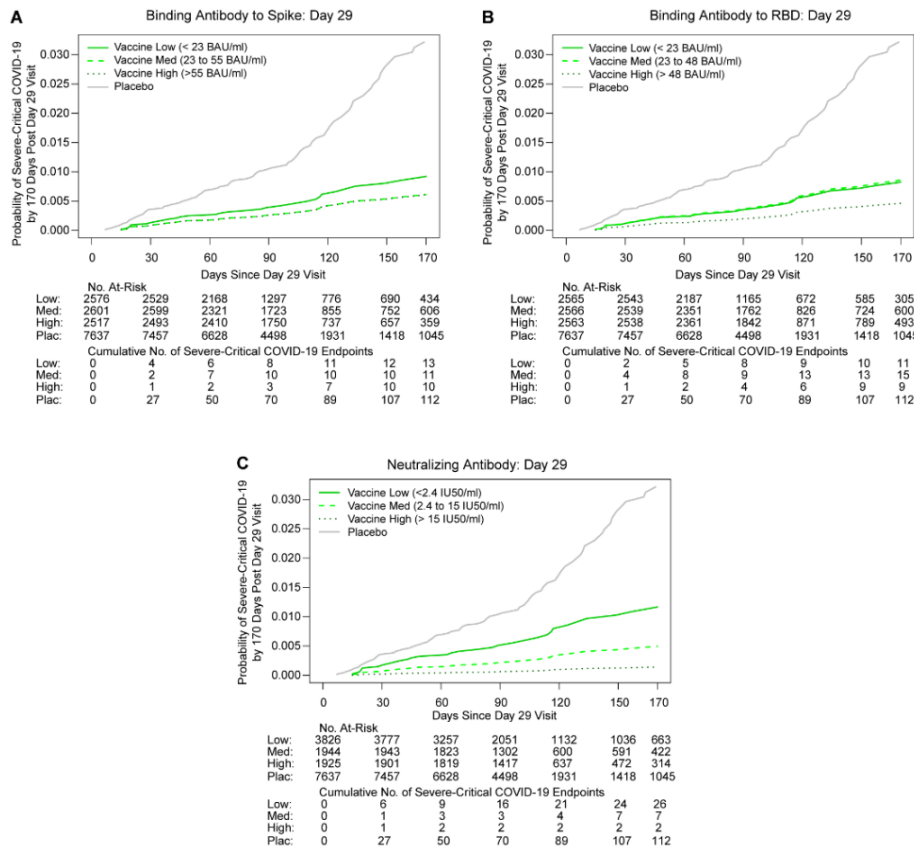

\*No. At-Risk = estimated number in the population for analysis; baseline seronegative per-protocol vaccine recipients in Latin America not experiencing the severe-critical COVID-19 endpoint or with any evidence of infection through D29.  
 \*Cumulative No. of Moderate to Severe-Critical COVID-19 Endpoints = estimated cumulative number of this cohort with a severe-critical COVID-19 endpoint.

**D**

| D29 Immunologic Marker  | Tertile | No. cases / No. at-risk <sup>§</sup> | Attack rate | Haz. Ratio Pt. Est. | 95% CI       | P-value (2-sided) | Overall P-value | FDR-adjusted P-value <sup>†</sup> | FWER-adjusted P-value <sup>‡</sup> |
|-------------------------|---------|--------------------------------------|-------------|---------------------|--------------|-------------------|-----------------|-----------------------------------|------------------------------------|
| Anti Spike IgG (BAU/ml) | Low     | 13/2,576                             | 0.0050      | 1                   | N/A          | N/A               | 0.629           | 0.783                             | 0.874                              |
|                         | Medium  | 11/2,601                             | 0.0042      | 0.66                | (0.25, 1.77) | 0.412             |                 |                                   |                                    |
|                         | High    | 10/2,517                             | 0.0040      | 0.66                | (0.24, 1.82) | 0.420             |                 |                                   |                                    |
| Anti RBD IgG (BAU/ml)   | Low     | 11/2,565                             | 0.0043      | 1                   | N/A          | N/A               | 0.474           | 0.774                             | 0.806                              |
|                         | Medium  | 15/2,566                             | 0.0058      | 1.04                | (0.40, 2.72) | 0.930             |                 |                                   |                                    |
|                         | High    | 9/2,563                              | 0.0035      | 0.56                | (0.19, 1.67) | 0.298             |                 |                                   |                                    |
| nAb-ID50 (IU50/ml)      | Low     | 26/3,826                             | 0.0068      | 1                   | N/A          | N/A               | 0.014           | 0.047                             | 0.048                              |
|                         | Medium  | 7/1,944                              | 0.0036      | 0.42                | (0.15, 1.20) | 0.104             |                 |                                   |                                    |
|                         | High    | 2/1,925                              | 0.0010      | 0.12                | (0.02, 0.57) | 0.008             |                 |                                   |                                    |
| Placebo                 |         | 116/7,637                            | 0.0152      |                     |              |                   |                 |                                   |                                    |

Baseline covariates adjusted for: baseline risk score. RBD, receptor binding domain; ID50, 50% inhibitory dilution titer.

<sup>§</sup> No. at-risk = estimated number in the population for analysis, i.e. baseline SARS-CoV-2 seronegative per-protocol vaccine recipients in Latin America not experiencing the severe-critical COVID-19 endpoint or with evidence of SARS-CoV-2 infection through D29; no. cases = numbers of this cohort with an observed severe-critical COVID-19 endpoint (with onset  $\geq 7$  days post D29 and  $\geq 28$  days post vaccination).  
<sup>†</sup> q-value and FWER (family-wise error rate) are computed over the set of p-values both for quantitative markers and categorical markers using the Westfall and Young permutation method (10000 replicates).

**Supplementary Fig. 13. Moderate COVID-19 risk by D29 antibody marker tertile in participants in Latin America.** (A-C) Covariate-adjusted cumulative incidence of moderate COVID-19 by Low, Medium, and High tertiles of D29 (A) anti-Spike IgG concentration, (B) anti-RBD IgG concentration, or (C) neutralizing antibody titer (nAb-ID50) in baseline SARS-CoV-2-seronegative per-protocol vaccine recipients in Latin America. (D) Covariate-adjusted hazard ratio of moderate COVID-19 across D29 antibody marker tertiles. Endpoint counts for (A-C) calculated by inverse probability of sampling D29 marker weighting. The overall p value is from a generalized Wald test of whether the hazard rate of moderate COVID-19 differed across the Low, Medium, and High subgroups. Analyses adjusted for baseline behavioral risk score. BAU, binding antibody units; CI, confidence interval; FDR, false discovery rate; FWER, family-wise error rate; IU, international units; nAb-ID50, 50% inhibitory dilution neutralizing antibody; Pt. Est., point estimate.

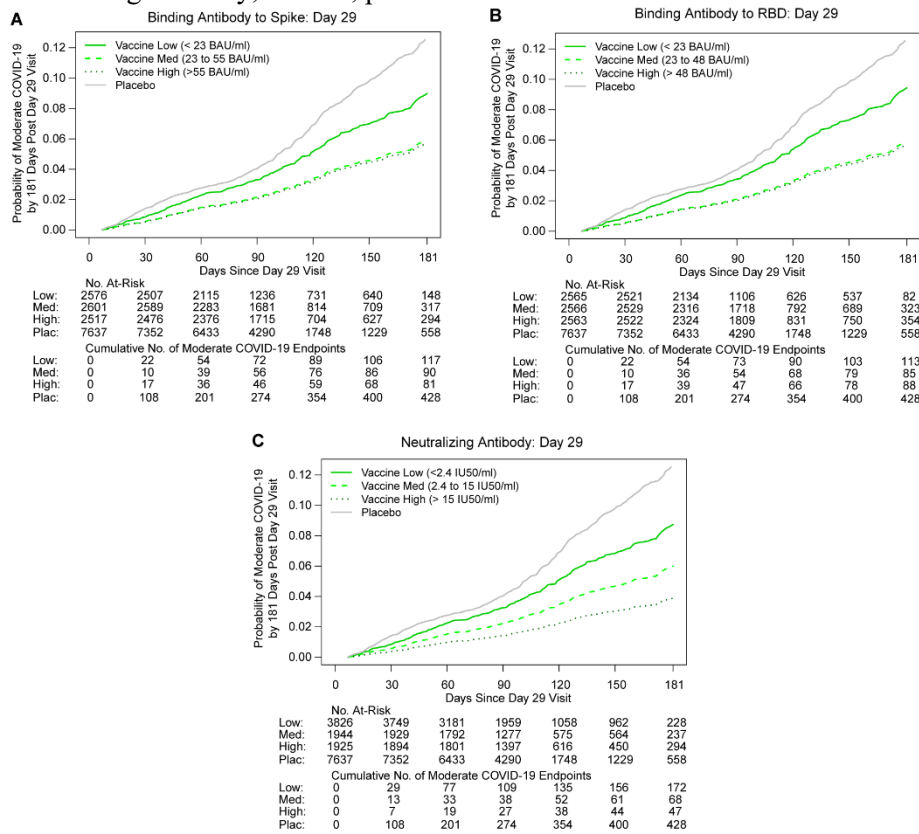

\*No. At-Risk = estimated number in the population for analysis; baseline seronegative per-protocol vaccine recipients in Latin America not experiencing the moderate COVID-19 endpoint or with any evidence of infection through D29.

\*\*Cumulative No. of Moderate COVID-19 Endpoints = estimated cumulative number of this cohort with a moderate COVID-19 endpoint.

**D**

| D29 Immunologic Marker  | Tertile | No. cases / No. at-risk <sup>§</sup> | Attack rate | Haz. Ratio Pt. Est. | 95% CI      | P-value (2-sided) | Overall P-value | FDR-adjusted P-value <sup>†</sup> | FWER-adjusted P-value <sup>†</sup> |
|-------------------------|---------|--------------------------------------|-------------|---------------------|-------------|-------------------|-----------------|-----------------------------------|------------------------------------|
| Anti Spike IgG (BAU/ml) | Low     | 117/2,576                            | 0.0454      | 1                   | N/A         | N/A               | 0.176           | 0.248                             | 0.315                              |
|                         | Medium  | 91/2,601                             | 0.0350      | 0.65                | (0.37,1.13) | 0.126             |                 |                                   |                                    |
|                         | High    | 82/2,517                             | 0.0326      | 0.62                | (0.35,1.10) | 0.102             |                 |                                   |                                    |
| Anti RBD IgG (BAU/ml)   | Low     | 113/2,565                            | 0.0441      | 1                   | N/A         | N/A               | 0.111           | 0.197                             | 0.263                              |
|                         | Medium  | 86/2,566                             | 0.0335      | 0.61                | (0.35,1.06) | 0.080             |                 |                                   |                                    |
|                         | High    | 90/2,563                             | 0.0351      | 0.59                | (0.33,1.04) | 0.069             |                 |                                   |                                    |
| nAb-ID50 (IU50/ml)      | Low     | 172/3,826                            | 0.0450      | 1                   | N/A         | N/A               | 0.034           | 0.138                             | 0.133                              |
|                         | Medium  | 69/1,944                             | 0.0355      | 0.67                | (0.38,1.20) | 0.178             |                 |                                   |                                    |
|                         | High    | 48/1,925                             | 0.0249      | 0.43                | (0.23,0.82) | 0.011             |                 |                                   |                                    |
| Placebo                 |         | 432/7,637                            | 0.0566      |                     |             |                   |                 |                                   |                                    |

Baseline covariates adjusted for: baseline risk score. RBD, receptor binding domain; ID50, 50% inhibitory dilution titer.

<sup>§</sup> No. at-risk = estimated number in the population for analysis, i.e. baseline SARS-CoV-2 seronegative per-protocol vaccine recipients in Latin America not experiencing the moderate COVID-19 endpoint or with evidence of SARS-CoV-2 infection through D29; no. cases = numbers of this cohort with an observed moderate COVID-19 endpoint (with onset  $\geq 7$  days post D29 and  $\geq 28$  days post vaccination).

<sup>†</sup> q-value and FWER (family-wise error rate) are computed over the set of p-values both for quantitative markers and categorical markers using the Westfall and Young permutation method (10000 replicates).

**Supplementary Fig. 14. Moderate to severe-critical COVID-19 risk by D29 antibody marker tertile in participants in Latin America. (A-C)** Covariate-adjusted cumulative incidence of moderate to severe-critical COVID-19 by Low, Medium, and High tertiles of D29 **(A)** anti-Spike IgG concentration, **(B)** anti-RBD IgG concentration, or **(C)** neutralizing antibody titer (nAb-ID50) in baseline SARS-CoV-2-seronegative per-protocol vaccine recipients in Latin America. **(D)** Covariate-adjusted hazard ratio of moderate to severe-critical COVID-19 across D29 antibody marker tertiles. Endpoint counts for **(A-C)** calculated by inverse probability of sampling D29 marker weighting. The overall p value is from a generalized Wald test of whether the hazard rate of moderate to severe-critical COVID-19 differed across the Low, Medium, and High subgroups. Analyses adjusted for baseline behavioral risk score. BAU, binding antibody units; CI, confidence interval; FDR, false discovery rate; FWER, family-wise error rate; IU, international units; nAb-ID50, 50% inhibitory dilution neutralizing antibody; Pt. Est., point estimate.

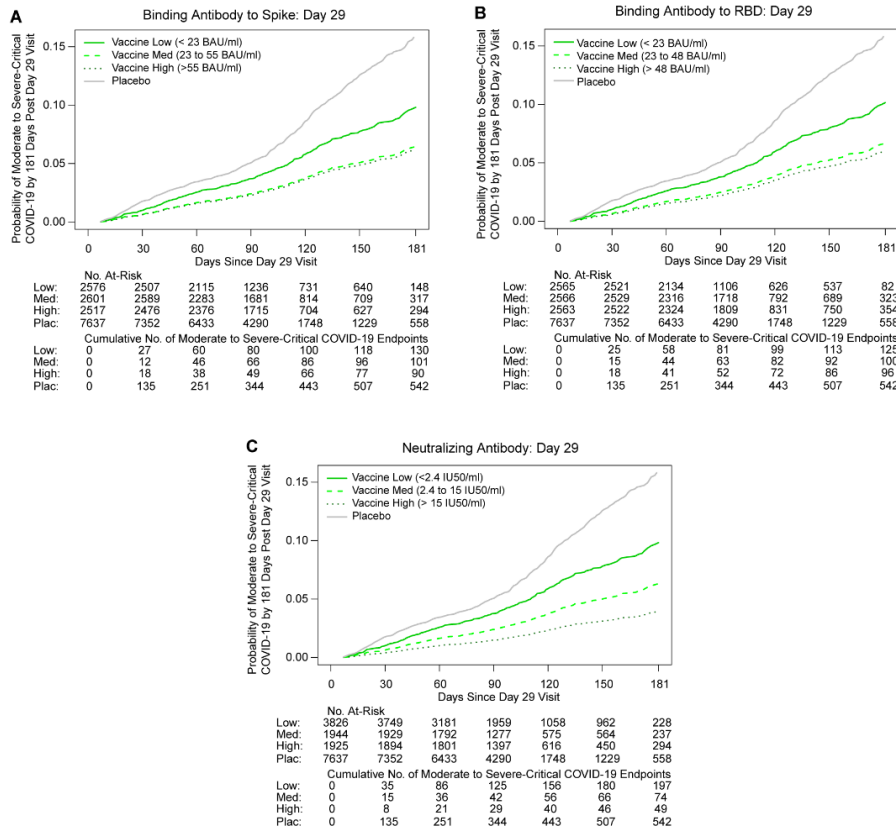

\*No. At-Risk = estimated number in the population for analysis: baseline seronegative per-protocol vaccine recipients in Latin America not experiencing the moderate to severe-critical COVID-19 endpoint or with any evidence of infection through D29.  
 \*\*Cumulative No. of Moderate to Severe-Critical COVID-19 Endpoints = estimated cumulative number of this cohort with a moderate to severe-critical COVID-19 endpoint.

**D**

| D29 Immunologic Marker  | Tertile | No. cases / No. at-risk <sup>§</sup> | Attack rate | Haz. Pt. Est. | Ratio 95% CI | P-value (2-sided) | Overall P-value | FDR-adjusted P-value <sup>†</sup> | FWER-adjusted P-value <sup>†</sup> |
|-------------------------|---------|--------------------------------------|-------------|---------------|--------------|-------------------|-----------------|-----------------------------------|------------------------------------|
| Anti Spike IgG (BAU/ml) | Low     | 130/2,576                            | 0.0505      | 1             | N/A          | N/A               | 0.165           | 0.234                             | 0.294                              |
|                         | Med     | 102/2,601                            | 0.0392      | 0.65          | (0.37, 1.13) | 0.124             |                 |                                   |                                    |
|                         | High    | 91/2,517                             | 0.0362      | 0.62          | (0.35, 1.08) | 0.093             |                 |                                   |                                    |
| Anti RBD IgG (BAU/ml)   | Low     | 125/2,565                            | 0.0487      | 1             | N/A          | N/A               | 0.122           | 0.207                             | 0.270                              |
|                         | Med     | 101/2,566                            | 0.0394      | 0.65          | (0.37, 1.12) | 0.119             |                 |                                   |                                    |
|                         | High    | 97/2,563                             | 0.0378      | 0.58          | (0.33, 1.02) | 0.058             |                 |                                   |                                    |
| nAb-ID50 (IU50/ml)      | Low     | 197/3,826                            | 0.0515      | 1             | N/A          | N/A               | 0.013           | 0.062                             | 0.062                              |
|                         | Med     | 75/1,944                             | 0.0386      | 0.63          | (0.36, 1.12) | 0.113             |                 |                                   |                                    |
|                         | High    | 50/1,925                             | 0.0260      | 0.39          | (0.20, 0.74) | 0.004             |                 |                                   |                                    |
| Placebo                 |         | 548/7,637                            | 0.0718      |               |              |                   |                 |                                   |                                    |

Baseline covariates adjusted for: baseline risk score. RBD, receptor binding domain; ID50, 50% inhibitory dilution titer.

§ No. at-risk = estimated number in the population for analysis, i.e. baseline SARS-CoV-2 seronegative per-protocol vaccine recipients in Latin America not experiencing the moderate to severe-critical COVID-19 endpoint or with evidence of SARS-CoV-2 infection through D29; no. cases = numbers of this cohort with an observed moderate to severe-critical COVID-19 endpoint (with onset  $\geq 7$  days post D29 and  $\geq 28$  days post vaccination).

† q-value and FWER (family-wise error rate) are computed over the set of p-values both for quantitative markers and categorical markers using the Westfall and Young permutation method (10000 replicates).

**Supplementary Fig. 15. Moderate to severe-critical COVID-19 risk by D29 antibody marker tertile in participants in South Africa. (A-C)** Covariate-adjusted cumulative incidence of moderate to severe-critical COVID-19 by Low, Medium, and High tertiles of D29 **(A)** anti-Spike IgG concentration, **(B)** anti-RBD IgG concentration, or **(C)** neutralizing antibody titer (nAb-ID50) in baseline SARS-CoV-2-seronegative per-protocol vaccine recipients in South Africa. **(D)** Covariate-adjusted hazard ratio of moderate to severe-critical COVID-19 across D29 antibody marker tertiles. Endpoint counts for **(A-C)** calculated by inverse probability of sampling D29 marker weighting. The overall p value is from a generalized Wald test of whether the hazard rate of moderate to severe-critical COVID-19 differed across the Low, Medium, and High subgroups. Analyses adjusted for baseline behavioral risk score. BAU, binding antibody units; CI, confidence interval; FDR, false discovery rate; FWER, family-wise error rate; IU, international units; nAb-ID50, 50% inhibitory dilution neutralizing antibody; Pt. Est., point estimate.

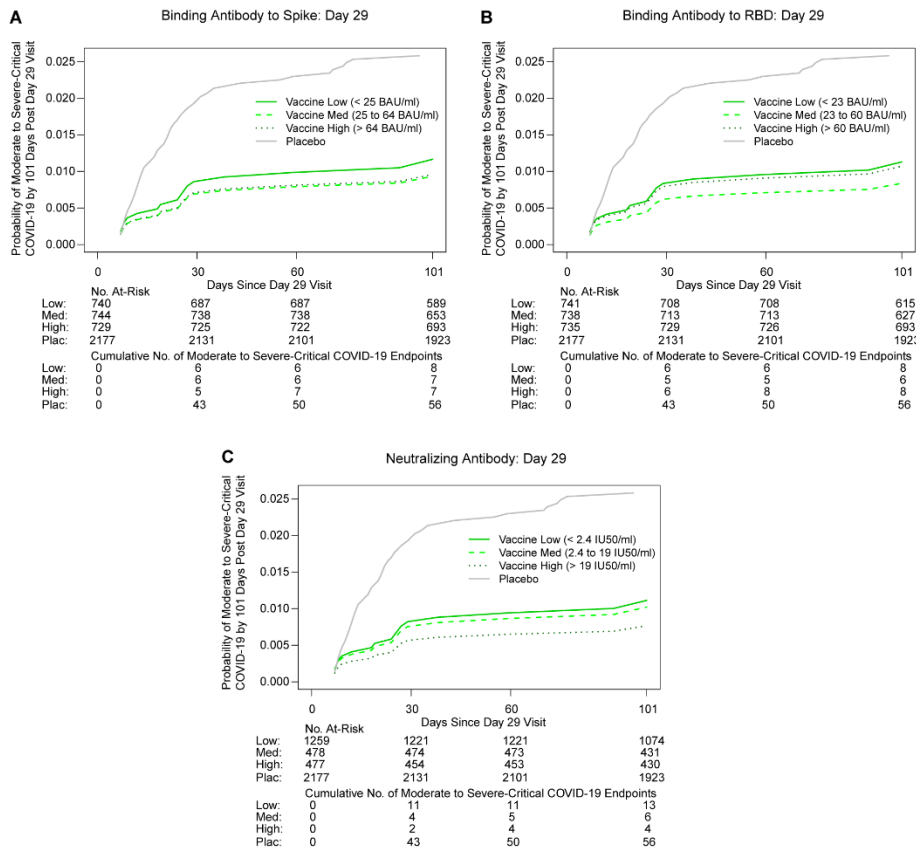

\*No. At-Risk = estimated number in the population for analysis: baseline seronegative per-protocol vaccine recipients in South Africa not experiencing the moderate to severe-critical COVID-19 endpoint or with any evidence of infection through D29.  
 \*\*Cumulative No. of Moderate to Severe-Critical COVID-19 Endpoints = estimated cumulative number of this cohort with a moderate to severe-critical COVID-19 endpoint.

**D**

| D29 Immunologic Marker  | Tertile | No. cases / No. at-risk <sup>§</sup> | Attack rate | Haz. Ratio Pt. Est. | 95% CI      | P-value (2-sided) | Overall P-value | FDR-adjusted P-value <sup>†</sup> | FWER-adjusted P-value <sup>‡</sup> |
|-------------------------|---------|--------------------------------------|-------------|---------------------|-------------|-------------------|-----------------|-----------------------------------|------------------------------------|
| Anti Spike IgG (BAU/ml) | Low     | 6/ 740                               | 0.0081      | 1                   | N/A         | N/A               | 0.909           | 0.969                             | 0.997                              |
|                         | Medium  | 5/ 744                               | 0.0067      | 0.74                | (0.17,3.27) | 0.695             |                 |                                   |                                    |
|                         | High    | 6/ 729                               | 0.0082      | 0.96                | (0.23,4.09) | 0.957             |                 |                                   |                                    |
| Anti RBD IgG (BAU/ml)   | Low     | 6/ 741                               | 0.0081      | 1                   | N/A         | N/A               | 0.974           | 0.976                             | 0.997                              |
|                         | Medium  | 5/ 738                               | 0.0068      | 0.84                | (0.19,3.80) | 0.820             |                 |                                   |                                    |
|                         | High    | 6/ 735                               | 0.0082      | 0.93                | (0.22,3.88) | 0.918             |                 |                                   |                                    |
| nAb-ID50 (IU50/ml)      | Low     | 9/1,259                              | 0.0071      | 1                   | N/A         | N/A               | 0.854           | 0.969                             | 0.997                              |
|                         | Medium  | 5/ 478                               | 0.0105      | 0.96                | (0.24,3.81) | 0.955             |                 |                                   |                                    |
|                         | High    | 2/ 477                               | 0.0042      | 0.62                | (0.11,3.41) | 0.586             |                 |                                   |                                    |
| Placebo                 |         | 36/2,177                             | 0.0165      |                     |             |                   |                 |                                   |                                    |

Baseline covariates adjusted for: baseline risk score. RBD, receptor binding domain; ID50, 50% inhibitory dilution titer.

§ No. at-risk = estimated number in the population for analysis, i.e. baseline SARS-CoV-2 seronegative per-protocol vaccine recipients in South Africa not experiencing the moderate to severe-critical COVID-19 endpoint or with evidence of SARS-CoV-2 infection through D29; no. cases = numbers of this cohort with an observed moderate to severe-critical COVID-19 endpoint (with onset  $\geq$  7 days post D29 and  $\geq$  28 days post vaccination).

† q-value and FWER (family-wise error rate) are computed over the set of p-values both for quantitative markers and categorical markers using the Westfall and Young permutation method (10000 replicates).

**Supplementary Fig. 16. Moderate to severe-critical COVID-19 risk by D29 antibody marker tertile in participants in the United States. (A-C) Covariate-adjusted cumulative incidence of moderate to severe-critical COVID-19 by Low, Medium, and High tertiles of D29 (A) anti-Spike IgG concentration, (B) anti-RBD IgG concentration, or (C) neutralizing antibody titer (nAb-ID50) in baseline SARS-CoV-2-seronegative per-protocol vaccine recipients in Latin America. (D) Covariate-adjusted hazard ratio of moderate to severe-critical COVID-19 across D29 antibody marker tertiles. Endpoint counts for (A-C) calculated by inverse probability of sampling D29 marker weighting. The overall p value is from a generalized Wald test of whether the hazard rate of moderate to severe-critical COVID-19 differed across the Low, Medium, and High subgroups. Analyses adjusted for baseline behavioral risk score. BAU, binding antibody units; CI, confidence interval; FDR, false discovery rate; FWER, family-wise error rate; IU, international units; nAb-ID50, 50% inhibitory dilution neutralizing antibody; Pt. Est., point estimate.**

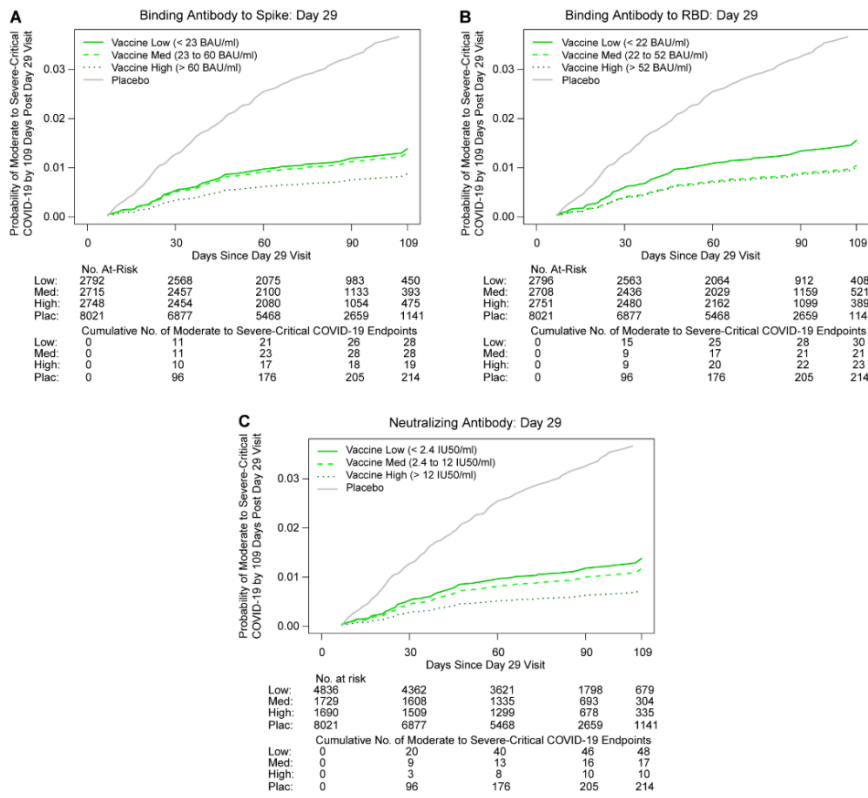

\*No. At-Risk = estimated number in the population for analysis: baseline seronegative per-protocol vaccine recipients in the United States not experiencing the moderate to severe-critical COVID-19 endpoint or with any evidence of infection through D29.  
 \*\*Cumulative No. of Moderate to Severe-Critical COVID-19 Endpoints = estimated cumulative number of this cohort with a moderate to severe-critical COVID-19 endpoint.

**D**

| D29 Immunologic Marker  | Tertile | No. cases / No. at-risk <sup>§</sup> | Attack rate | Haz. Ratio |              | P-value (2-sided) | Overall P-value | FDR-adjusted P-value <sup>†</sup> | FWER-adjusted P-value <sup>†</sup> |
|-------------------------|---------|--------------------------------------|-------------|------------|--------------|-------------------|-----------------|-----------------------------------|------------------------------------|
|                         |         |                                      |             | Pt. Est.   | 95% CI       |                   |                 |                                   |                                    |
| Anti Spike IgG (BAU/ml) | Low     | 28/2,792                             | 0.0100      | 1          | N/A          | N/A               | 0.388           | 0.391                             | 0.550                              |
|                         | Medium  | 28/2,715                             | 0.0103      | 0.94       | (0.49, 1.82) | 0.862             |                 |                                   |                                    |
|                         | High    | 19/2,748                             | 0.0069      | 0.63       | (0.31, 1.27) | 0.190             |                 |                                   |                                    |
| Anti RBD IgG (BAU/ml)   | Low     | 30/2,796                             | 0.0107      | 1          | N/A          | N/A               | 0.366           | 0.391                             | 0.550                              |
|                         | Medium  | 21/2,708                             | 0.0078      | 0.67       | (0.34, 1.32) | 0.246             |                 |                                   |                                    |
|                         | High    | 23/2,751                             | 0.0084      | 0.65       | (0.33, 1.28) | 0.210             |                 |                                   |                                    |
| nAb-ID50 (IU50/ml)      | Low     | 48/4,836                             | 0.0099      | 1          | N/A          | N/A               | 0.305           | 0.391                             | 0.550                              |
|                         | Medium  | 17/1,729                             | 0.0098      | 0.85       | (0.42, 1.71) | 0.642             |                 |                                   |                                    |
|                         | High    | 10/1,690                             | 0.0059      | 0.53       | (0.24, 1.19) | 0.124             |                 |                                   |                                    |
| Placebo                 |         | 214/8,021                            | 0.0267      |            |              |                   |                 |                                   |                                    |

Baseline covariates adjusted for: baseline risk score, RBD, receptor binding domain; ID50, 50% inhibitory dilution titer.

<sup>§</sup> No. at-risk = estimated number in the population for analysis, i.e. baseline SARS-CoV-2 seronegative per-protocol vaccine recipients in the United States not experiencing the moderate to severe-critical COVID-19 endpoint or with evidence of SARS-CoV-2 infection through D29; no. cases = numbers of this cohort with an observed moderate to severe-critical COVID-19 endpoint (with onset  $\geq 7$  days post D29 and  $\geq 28$  days post vaccination).

<sup>†</sup> q-value and FWER (family-wise error rate) are computed over the set of p-values both for quantitative markers and categorical markers using the Westfall and Young permutation method (10000 replicates).



**Supplementary Fig. 17. Severe-critical COVID-19 risk by D29 antibody marker level.** Covariate-adjusted cumulative incidence of severe-critical COVID-19 by D29 (A) anti-Spike IgG concentration, (B) anti-RBD IgG concentration, or (C) neutralizing antibody titer (nAb-ID50) in baseline SARS-CoV-2-seronegative per-protocol vaccine recipients. Incidence is shown through 170 days post D29 and was estimated using a Cox model (purple) or a nonparametric method (blue). Dotted lines and shading indicate bootstrap pointwise 95% CIs. The upper and lower horizontal gray lines are the overall cumulative incidence of severe-critical COVID-19 from 1 to 170 days post D29 in placebo and vaccine recipients, respectively. The green histograms are estimates of the frequency distribution of each D29 antibody marker in baseline SARS-CoV-2 seronegative per-protocol vaccine recipients. Analyses adjusted for baseline behavioral risk score and geographic region. Nonparametric curves are plotted over the Spike IgG concentration range from negative response to the 90<sup>th</sup> percentile (125 BAU/ml), RBD IgG concentration range from negative response to the 90<sup>th</sup> percentile (118 BAU/ml), and nAb-ID50 titer range from unquantifiable to the 90<sup>th</sup> percentile (30.2 IU50/ml). Cox curves are plotted over the Spike IgG concentration range from negative response to the 97.5<sup>th</sup> percentile (238 BAU/ml), RBD IgG concentration range from negative response to the 97.5<sup>th</sup> percentile (173 BAU/ml), and nAb-ID50 titer range from unquantifiable to the 97.5<sup>th</sup> percentile (123 IU50/ml). Positivity cutoffs: 10.8424 BAU/ml for Spike and 14.0858 BAU/ml for RBD. nAb-ID50 LLOQ=4.8975 IU50/ml. BAU, binding antibody units; CI, confidence interval; IU, international units; LLOQ, lower limit of quantitation; nAb-ID50, 50% inhibitory dilution neutralizing antibody.

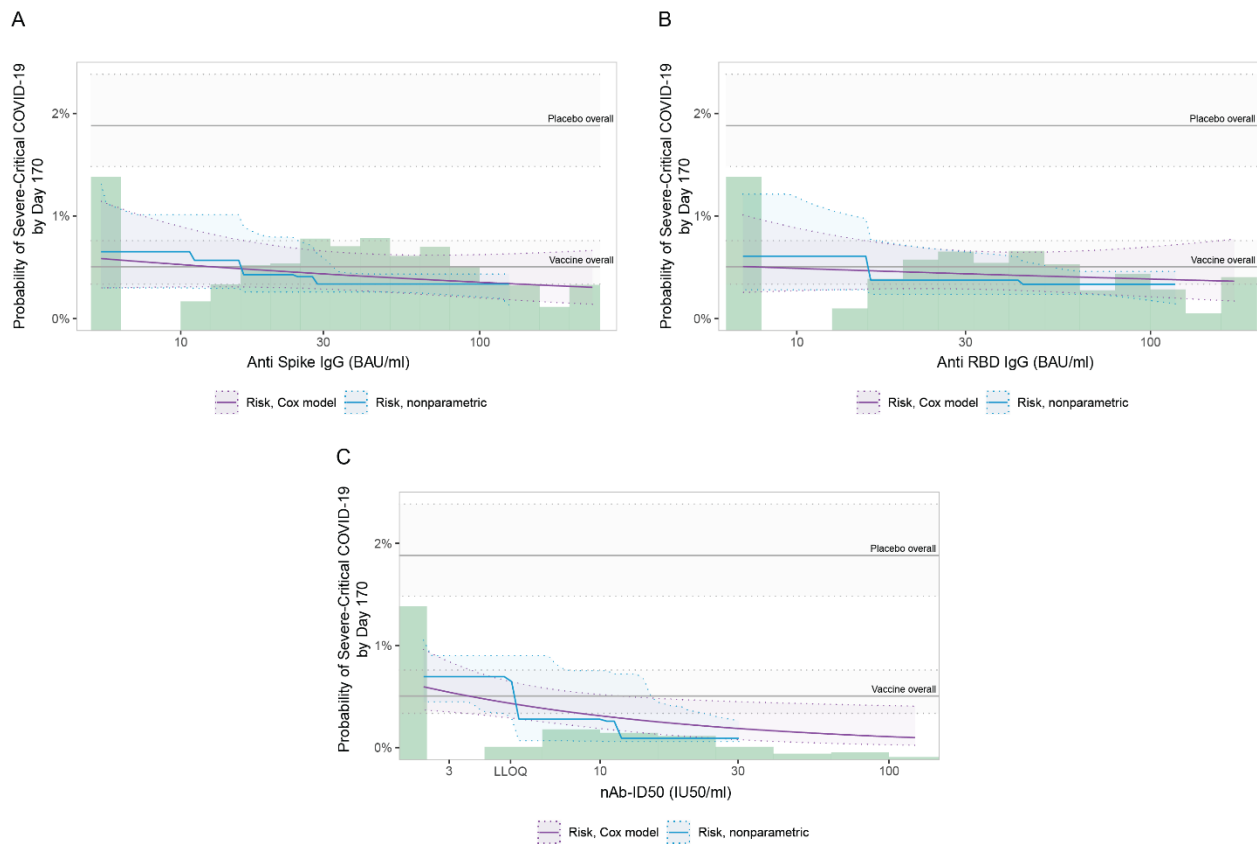

**Supplementary Fig. 18. Moderate COVID-19 risk by D29 antibody marker level.** Covariate-adjusted cumulative incidence of moderate COVID-19 by D29 (A) anti-Spike IgG concentration, (B) anti-RBD IgG concentration, or (C) neutralizing antibody titer (nAb-ID50) in baseline SARS-CoV-2-seronegative per-protocol vaccine recipients. Incidence is shown through 181 days post D29 and was estimated using a Cox model (purple) or a nonparametric method (blue). Dotted lines and shading indicate bootstrap pointwise 95% CIs. The upper and lower horizontal gray lines are the overall cumulative incidence of moderate COVID-19 from 1 to 181 days post D29 in placebo and vaccine recipients, respectively. The green histograms are estimates of the frequency distribution of each D29 antibody marker in baseline SARS-CoV-2 seronegative per-protocol vaccine recipients. Analyses adjusted for baseline behavioral risk score and geographic region. Nonparametric curves are plotted over the Spike IgG concentration range from negative response to the 90<sup>th</sup> percentile (125 BAU/ml), RBD IgG concentration range from negative response to the 90<sup>th</sup> percentile (118 BAU/ml), and nAb-ID50 titer range from unquantifiable to the 90<sup>th</sup> percentile (30.2 IU50/ml). Cox curves are plotted over the Spike IgG concentration range from negative response to the 97.5<sup>th</sup> percentile (238 BAU/ml), RBD IgG concentration range from negative response to the 97.5<sup>th</sup> percentile (173 BAU/ml), and nAb-ID50 titer range from unquantifiable to the 97.5<sup>th</sup> percentile (123 IU50/ml). Positivity cutoffs: 10.8424 BAU/ml for Spike and 14.0858 BAU/ml for RBD. nAb-ID50 LLOQ=4.8975 IU50/ml. BAU, binding antibody units; CI, confidence interval; IU, international units; LLOQ, lower limit of quantitation; nAb-ID50, 50% inhibitory dilution neutralizing antibody.

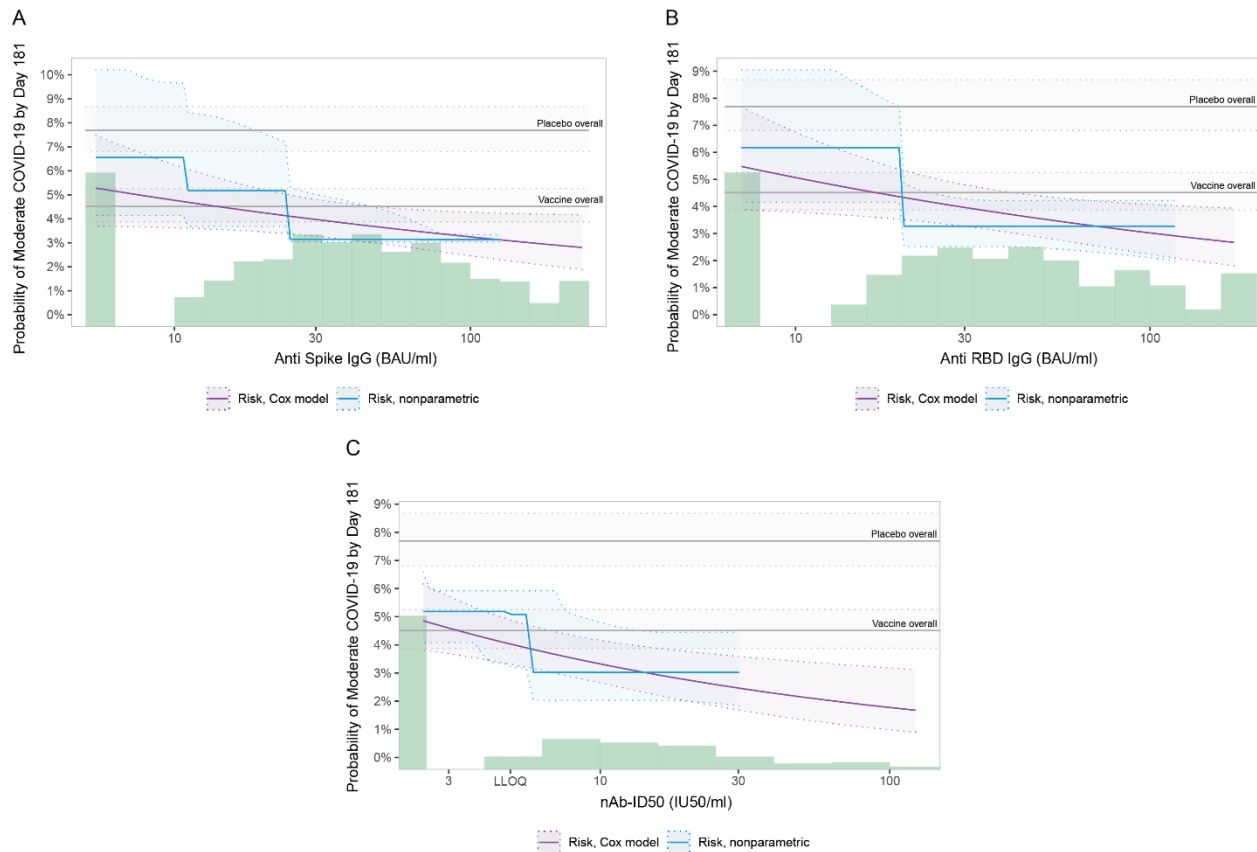

**Supplementary Fig. 19. Moderate to severe-critical COVID-19 risk by D29 antibody marker level.**

Covariate-adjusted cumulative incidence of moderate to severe-critical COVID-19 by D29 (A) anti-Spike IgG concentration, (B) anti-RBD IgG concentration, or (C) neutralizing antibody titer (nAb-ID50) in baseline SARS-CoV-2-seronegative per-protocol vaccine recipients. Incidence is shown through 181 days post D29 and was estimated using a Cox model (purple) or a nonparametric method (blue). Dotted lines and shading indicate bootstrap pointwise 95% CIs. The upper and lower horizontal gray lines are the overall cumulative incidence of moderate to severe-critical COVID-19 from 1 to 181 days post D29 in placebo and vaccine recipients, respectively. The green histograms are estimates of the frequency distribution of each D29 antibody marker in baseline SARS-CoV-2 seronegative per-protocol vaccine recipients. Analyses adjusted for baseline behavioral risk score and geographic region. Nonparametric curves are plotted over the Spike IgG concentration range from negative response to the 90<sup>th</sup> percentile (125 BAU/ml), RBD IgG concentration range from negative response to the 90<sup>th</sup> percentile (118 BAU/ml), and nAb-ID50 titer range from unquantifiable to the 90<sup>th</sup> percentile (30.2 IU50/ml). Cox curves are plotted over the Spike IgG concentration range from negative response to the 97.5<sup>th</sup> percentile (238 BAU/ml), RBD IgG concentration range from negative response to the 97.5<sup>th</sup> percentile (173 BAU/ml), and nAb-ID50 titer range from unquantifiable to the 97.5<sup>th</sup> percentile (123 IU50/ml). Positivity cutoffs: 10.8424 BAU/ml for Spike and 14.0858 BAU/ml for RBD. nAb-ID50 LLOQ=4.8975 IU50/ml. BAU, binding antibody units; CI, confidence interval; IU, international units; LLOQ, lower limit of quantitation; nAb-ID50, 50% inhibitory dilution neutralizing antibody.

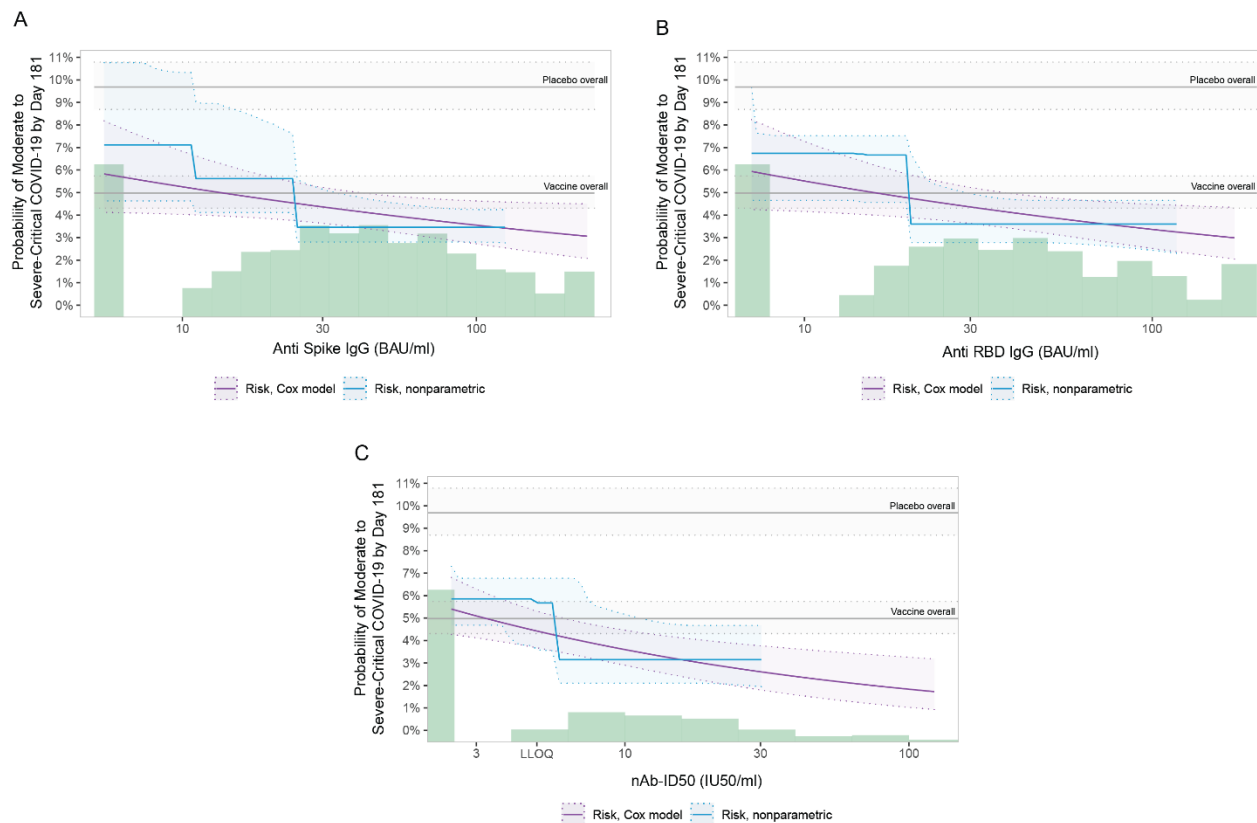

**Supplementary Fig. 20. Severe-critical COVID-19 risk by D29 antibody marker level in participants in Latin America.** Covariate-adjusted cumulative incidence of severe-critical COVID-19 by D29 (A) anti-Spike IgG concentration, (B) anti-RBD IgG concentration, or (C) neutralizing antibody titer (nAb-ID50) in baseline SARS-CoV-2-seronegative per-protocol vaccine recipients in Latin America. Incidence is shown through 170 days post D29 and was estimated using a Cox model (purple) or a nonparametric method (blue). Dotted lines and shading indicate bootstrap pointwise 95% CIs. The upper and lower horizontal gray lines are the overall cumulative incidence of severe-critical COVID-19 from 1 to 170 days post D29 in placebo and vaccine recipients, respectively, in Latin America. The green histograms are estimates of the frequency distribution of each D29 antibody marker in baseline SARS-CoV-2 seronegative per-protocol vaccine recipients in Latin America. Analyses adjusted for baseline behavioral risk score. Nonparametric curves are plotted over the Spike IgG concentration range from negative response to the 90<sup>th</sup> percentile (121 BAU/ml), RBD IgG concentration range from negative response to the 90<sup>th</sup> percentile (114 BAU/ml), and nAb-ID50 titer range from unquantifiable to the 90<sup>th</sup> percentile (28.5 IU50/ml). Cox curves are plotted over the Spike IgG concentration range from negative response to the 97.5<sup>th</sup> percentile (238 BAU/ml), RBD IgG concentration range from negative response to the 97.5<sup>th</sup> percentile (173 BAU/ml), and nAb-ID50 titer range from unquantifiable to the 97.5<sup>th</sup> percentile (97.2 IU50/ml). Positivity cutoffs: 10.8424 BAU/ml for Spike and 14.0858 BAU/ml for RBD. nAb-ID50 LLOQ=4.8975 IU50/ml. BAU, binding antibody units; CI, confidence interval; IU, international units; LLOQ, lower limit of quantitation; nAb-ID50, 50% inhibitory dilution neutralizing antibody.

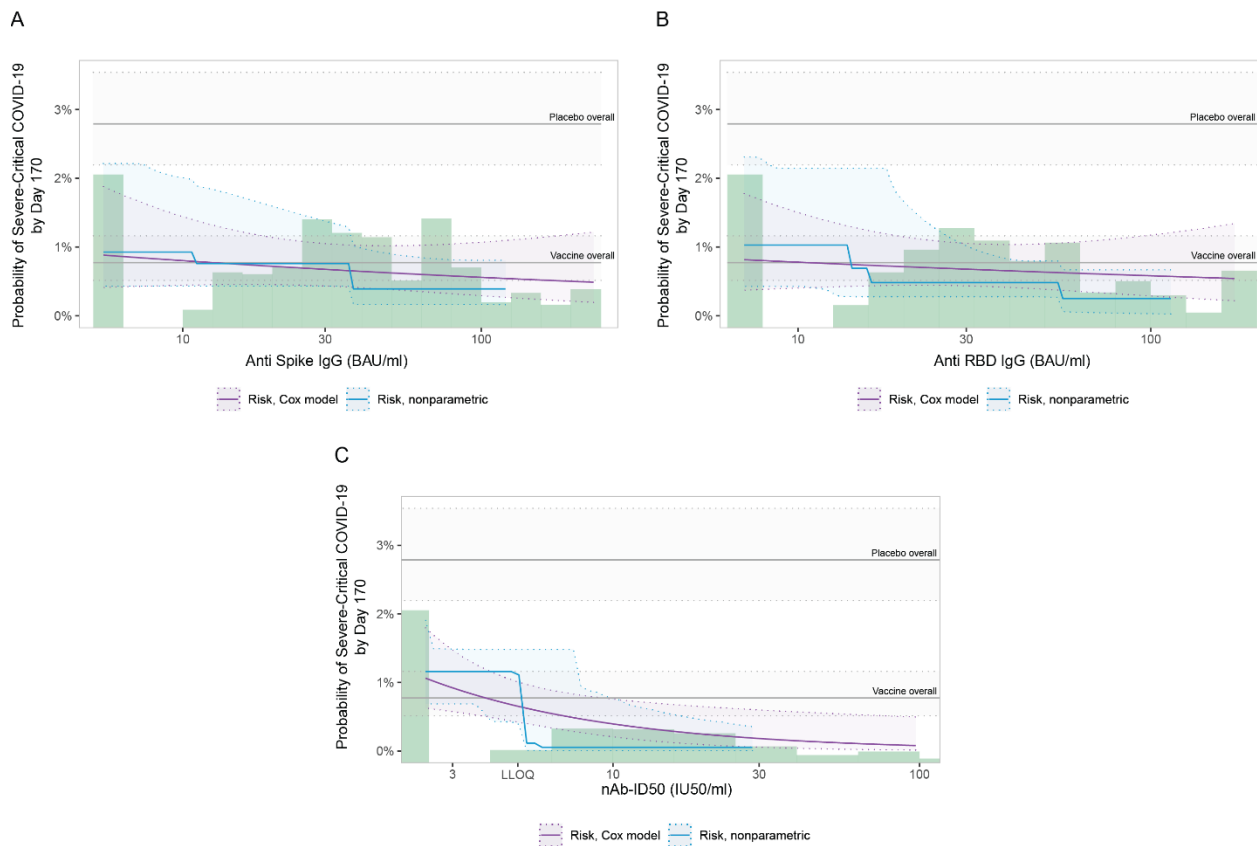

**Supplementary Fig. 21. Moderate COVID-19 risk by D29 antibody marker level in participants in Latin America.** Covariate-adjusted cumulative incidence of moderate COVID-19 by D29 (A) anti-Spike IgG concentration, (B) anti-RBD IgG concentration, or (C) neutralizing antibody titer (nAb-ID50) in baseline SARS-CoV-2-seronegative per-protocol vaccine recipients in Latin America. Incidence is shown through 181 days post D29 and was estimated using a Cox model (purple) or a nonparametric method (blue). Dotted lines and shading indicate bootstrap pointwise 95% CIs. The upper and lower horizontal gray lines are the overall cumulative incidence of moderate COVID-19 from 1 to 181 days post D29 in placebo and vaccine recipients, respectively, in Latin America. The green histograms are estimates of the frequency distribution of each D29 antibody marker in baseline SARS-CoV-2 seronegative per-protocol vaccine recipients in Latin America. Analyses adjusted for baseline behavioral risk score. Nonparametric curves are plotted over the Spike IgG concentration range from negative response to the 90<sup>th</sup> percentile (121 BAU/ml), RBD IgG concentration range from negative response to the 90<sup>th</sup> percentile (114 BAU/ml), and nAb-ID50 titer range from unquantifiable to the 90<sup>th</sup> percentile (28.5 IU50/ml). Cox curves are plotted over the Spike IgG concentration range from negative response to the 97.5<sup>th</sup> percentile (238 BAU/ml), RBD IgG concentration range from negative response to the 97.5<sup>th</sup> percentile (173 BAU/ml), and nAb-ID50 titer range from unquantifiable to the 97.5<sup>th</sup> percentile (97.2 IU50/ml). Positivity cutoffs: 10.8424 BAU/ml for Spike and 14.0858 BAU/ml for RBD. nAb-ID50 LLOQ=4.8975 IU50/ml. BAU, binding antibody units; CI, confidence interval; IU, international units; LLOQ, lower limit of quantitation; nAb-ID50, 50% inhibitory dilution neutralizing antibody.

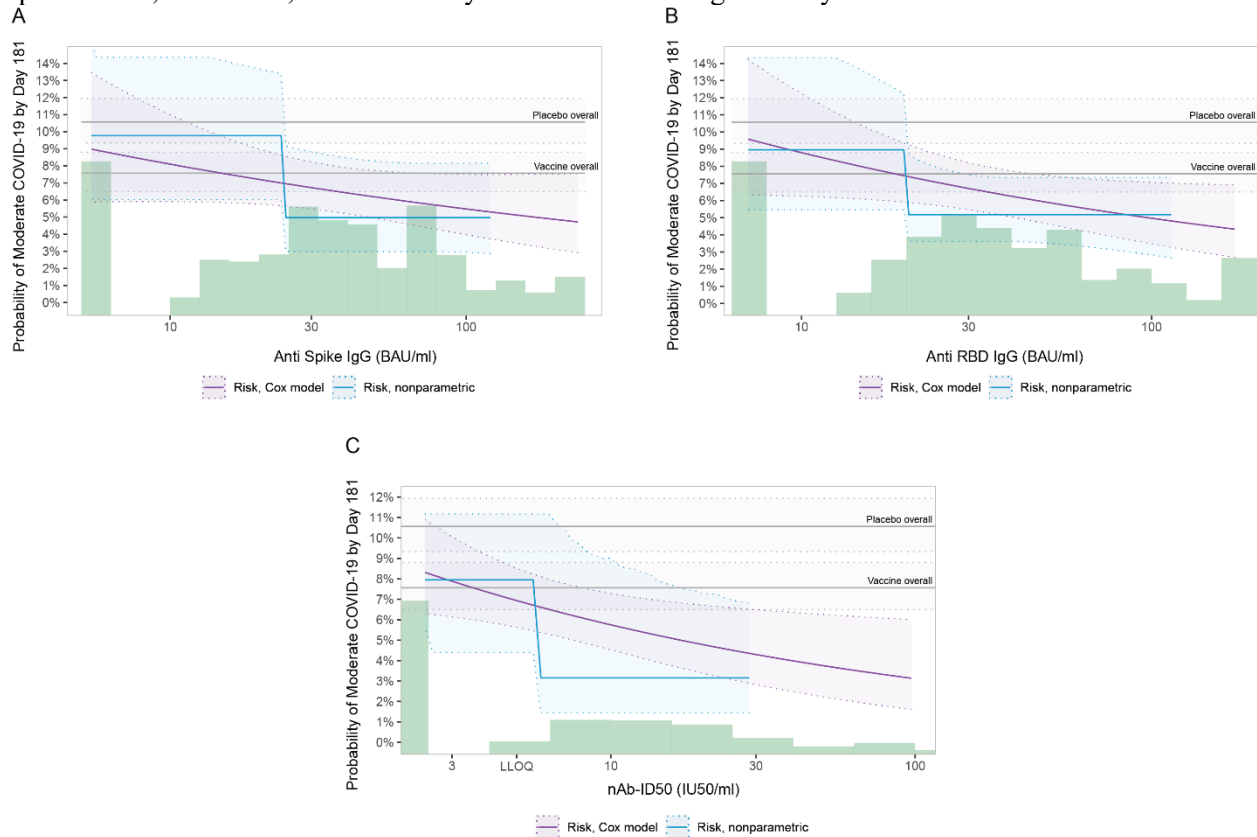

**Supplementary Fig. 22. Moderate to severe-critical COVID-19 risk by D29 antibody marker level in participants in Latin America.** Covariate-adjusted cumulative incidence of moderate to severe-critical COVID-19 by D29 (A) anti-Spike IgG concentration, (B) anti-RBD IgG concentration, or (C) neutralizing antibody titer (nAb-ID50) in baseline SARS-CoV-2-seronegative per-protocol vaccine recipients in Latin America. Incidence is shown through 181 days post D29 and was estimated using a Cox model (purple) or a nonparametric method (blue). Dotted lines and shading indicate bootstrap pointwise 95% CIs. The upper and lower horizontal gray lines are the overall cumulative incidence of moderate to severe-critical COVID-19 from 1 to 181 days post D29 in placebo and vaccine recipients, respectively, in Latin America. The green histograms are estimates of the frequency distribution of each D29 antibody marker in baseline SARS-CoV-2 seronegative per-protocol vaccine recipients in Latin America. Analyses adjusted for baseline behavioral risk score. Nonparametric curves are plotted over the Spike IgG concentration range from negative response to the 90<sup>th</sup> percentile (121 BAU/ml), RBD IgG concentration range from negative response to the 90<sup>th</sup> percentile (114 BAU/ml), and nAb-ID50 titer range from unquantifiable to the 90<sup>th</sup> percentile (28.5 IU50/ml). Cox curves are plotted over the Spike IgG concentration range from negative response to the 97.5<sup>th</sup> percentile (238 BAU/ml), RBD IgG concentration range from negative response to the 97.5<sup>th</sup> percentile (173 BAU/ml), and nAb-ID50 titer range from unquantifiable to the 97.5<sup>th</sup> percentile (97.2 IU50/ml). Positivity cutoffs: 10.8424 BAU/ml for Spike and 14.0858 BAU/ml for RBD. nAb-ID50 LLOQ=4.8975 IU50/ml. BAU, binding antibody units; CI, confidence interval; IU, international units; LLOQ, lower limit of quantitation; nAb-ID50, 50% inhibitory dilution neutralizing antibody.

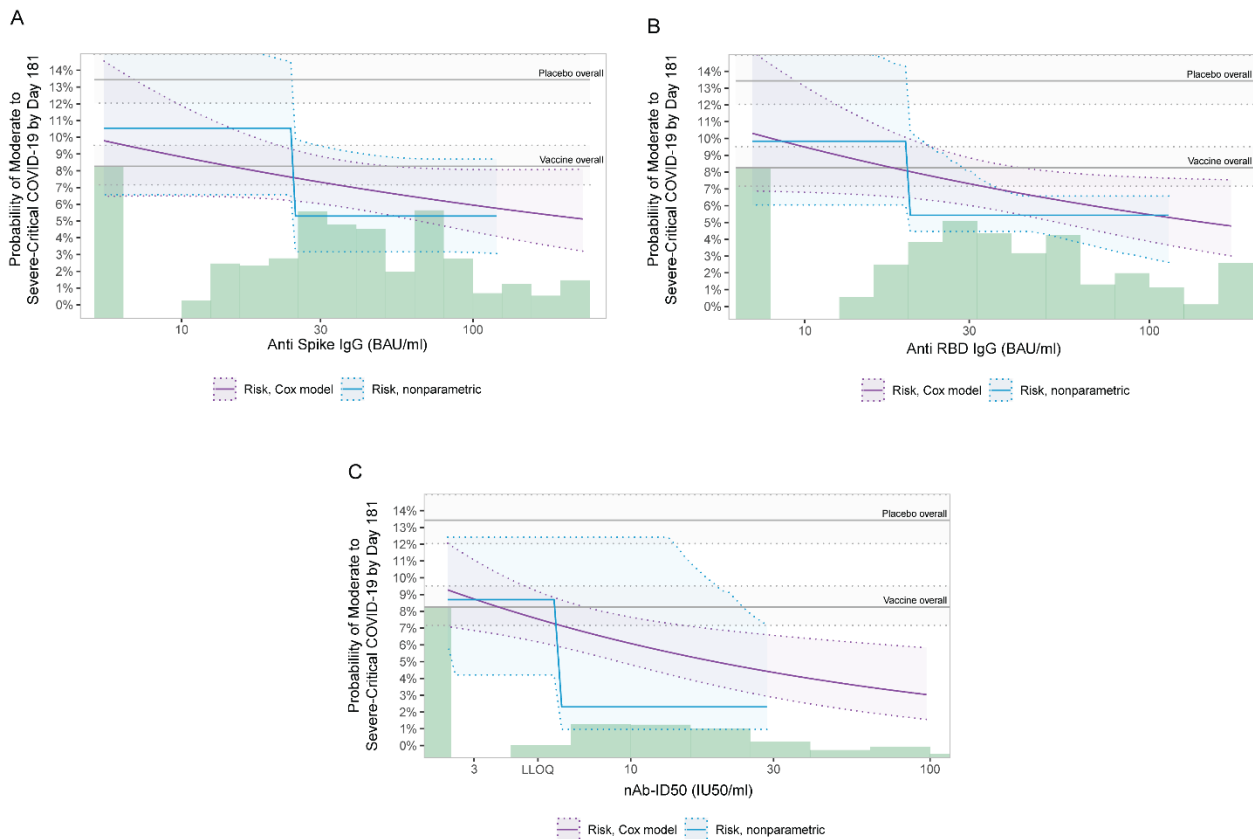

**Supplementary Fig. 23. Moderate to severe-critical COVID-19 risk by D29 antibody marker level in participants in South Africa.** Covariate-adjusted cumulative incidence of moderate to severe-critical COVID-19 by D29 (A) anti-Spike IgG concentration, (B) anti-RBD IgG concentration, or (C) neutralizing antibody titer (nAb-ID50) in baseline SARS-CoV-2-seronegative per-protocol vaccine recipients in South Africa. Incidence is shown through 101 days post D29 and was estimated using a Cox model (purple) or a nonparametric method (blue). Dotted lines and shading indicate bootstrap pointwise 95% CIs. The upper and lower horizontal gray lines are the overall cumulative incidence of moderate to severe-critical COVID-19 from 1 to 101 days post D29 in placebo and vaccine recipients, respectively, in South Africa. The green histograms are estimates of the frequency distribution of each D29 antibody marker in baseline SARS-CoV-2 seronegative per-protocol vaccine recipients in South Africa. Analyses adjusted for baseline behavioral risk score. Nonparametric curves are plotted over the Spike IgG concentration range from negative response to the 90<sup>th</sup> percentile (125 BAU/ml), RBD IgG concentration range from negative response to the 90<sup>th</sup> percentile (125 BAU/ml), and nAb-ID50 titer range from unquantifiable to the 90<sup>th</sup> percentile (30.2 IU50/ml). Cox curves are plotted over the Spike IgG concentration range from negative response to the 97.5<sup>th</sup> percentile (238 BAU/ml), RBD IgG concentration range from negative response to the 97.5<sup>th</sup> percentile (173 BAU/ml), and nAb-ID50 titer range from unquantifiable to the 97.5<sup>th</sup> percentile (91.7 IU50/ml). Positivity cutoffs: 10.8424 BAU/ml for Spike and 14.0858 BAU/ml for RBD. nAb-ID50 LLOQ=4.8975 IU50/ml. BAU, binding antibody units; CI, confidence interval; IU, international units; LLOQ, lower limit of quantitation; nAb-ID50, 50% inhibitory dilution neutralizing antibody.

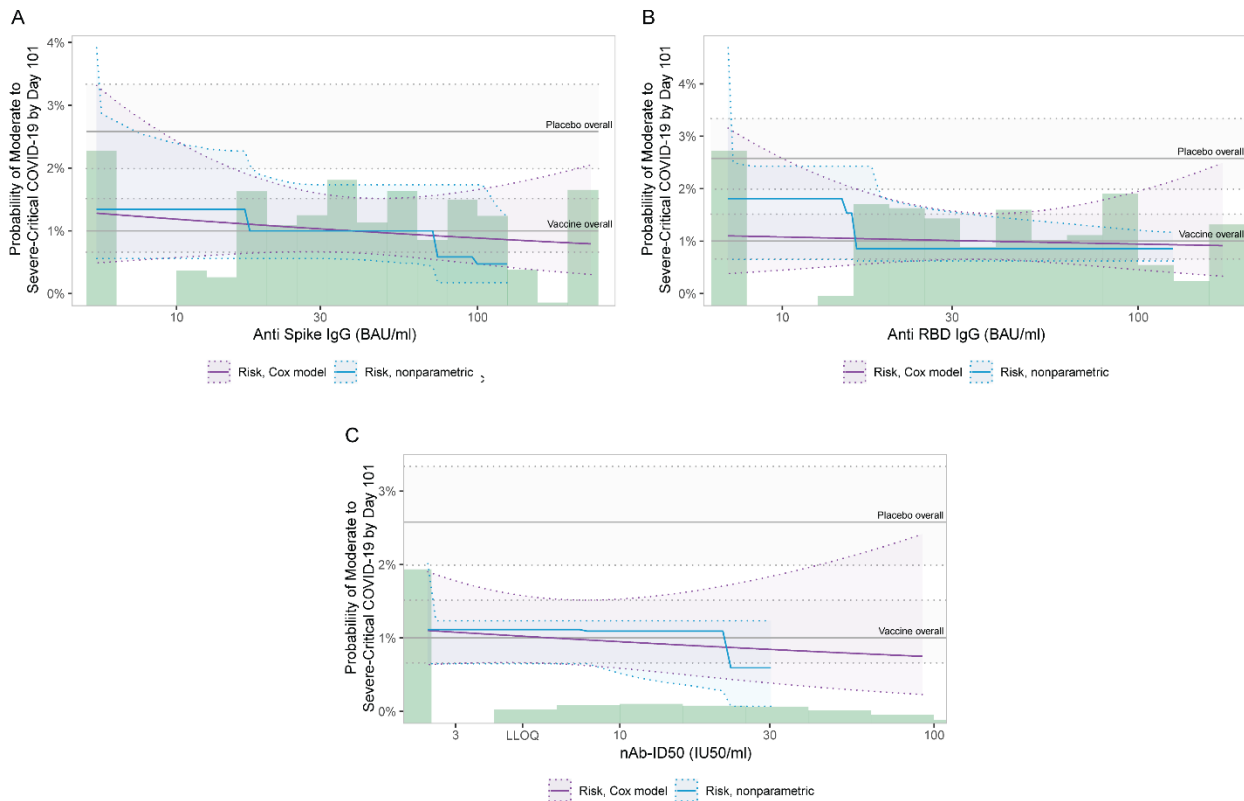

**Supplementary Fig. 24. Moderate to severe-critical COVID-19 risk by D29 antibody marker level in participants in the United States.** Covariate-adjusted cumulative incidence of moderate to severe-critical COVID-19 by D29 (A) anti-Spike IgG concentration, (B) anti-RBD IgG concentration, or (C) neutralizing antibody titer (nAb-ID50) in baseline SARS-CoV-2-seronegative per-protocol vaccine recipients in the United States. Incidence is shown through 109 days post D29 and was estimated using a Cox model (purple) or a nonparametric method (blue). Dotted lines and shading indicate bootstrap pointwise 95% CIs. The upper and lower horizontal gray lines are the overall cumulative incidence of moderate to severe-critical COVID-19 from 1 to 109 days post D29 in placebo and vaccine recipients, respectively, in the United States. The green histograms are estimates of the frequency distribution of each D29 antibody marker in baseline SARS-CoV-2 seronegative per-protocol vaccine recipients in the United States. Analyses adjusted for baseline behavioral risk score. Nonparametric curves are plotted over the Spike IgG concentration range from negative response to the 90<sup>th</sup> percentile (130 BAU/ml), RBD IgG concentration range from negative response to the 90<sup>th</sup> percentile (118 BAU/ml), and nAb-ID50 titer range from unquantifiable to the 90<sup>th</sup> percentile (30.2 IU50/ml). Cox curves are plotted over the Spike IgG concentration range from negative response to the 97.5<sup>th</sup> percentile (213 BAU/ml), RBD IgG concentration range from negative response to the 97.5<sup>th</sup> percentile (173 BAU/ml), and nAb-ID50 titer range from unquantifiable to the 97.5<sup>th</sup> percentile (164 IU50/ml). Positivity cutoffs: 10.8424 BAU/ml for Spike and 14.0858 BAU/ml for RBD. nAb-ID50 LLOQ=4.8975 IU50/ml. BAU, binding antibody units; CI, confidence interval; IU, international units; LLOQ, lower limit of quantitation; nAb-ID50, 50% inhibitory dilution neutralizing antibody.

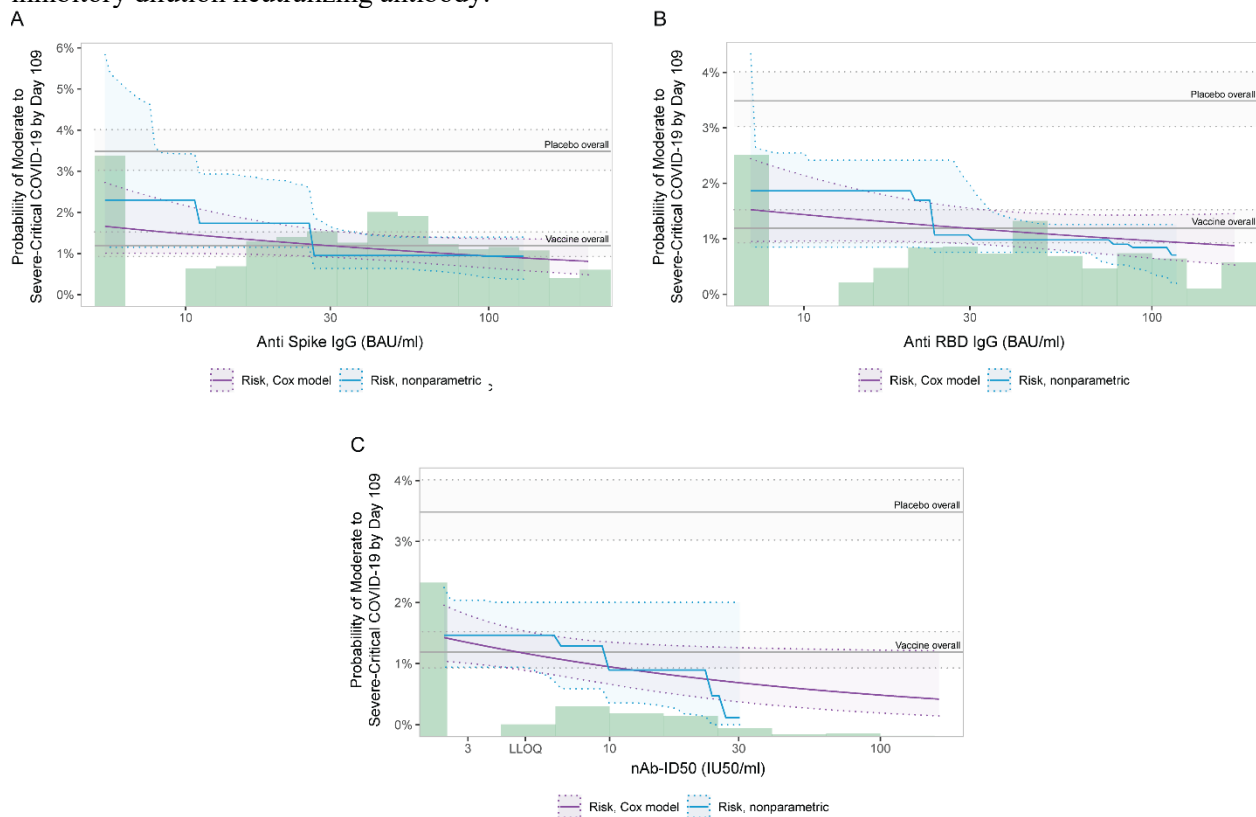



**Supplementary Fig. 25. Severe-critical COVID-19 risk by D29 antibody marker level above a threshold.** Covariate-adjusted cumulative incidence of severe-critical COVID-19 by D29 (A) anti-Spike IgG concentration, (B) anti-RBD IgG concentration, or (C) neutralizing antibody titer (nAb-ID50) above a threshold in baseline SARS-CoV-2-seronegative per-protocol vaccine recipients. Incidence is shown through 170 days post D29. Blue dots are point estimates at each severe-critical COVID-19 endpoint linearly interpolated as shown by solid black lines; the grey shaded area indicates pointwise 95% CIs. The estimates and CIs were adjusted using the assumption that the true threshold-response is non-increasing. The upper boundary of the green shaded area is the estimate of the reverse cumulative distribution function (CDF) of D29 antibody marker level. The vertical red dashed line is the D29 antibody marker threshold above which no severe-critical COVID-19 endpoints occurred. Analyses adjusted for baseline behavioral risk score and geographic region. POS, positivity cutoff: 10.8424 BAU/ml for Spike and 14.0858 BAU/ml for RBD. LLOQ, lower limit of quantitation = 4.8975 IU50/ml for nAb-ID50.

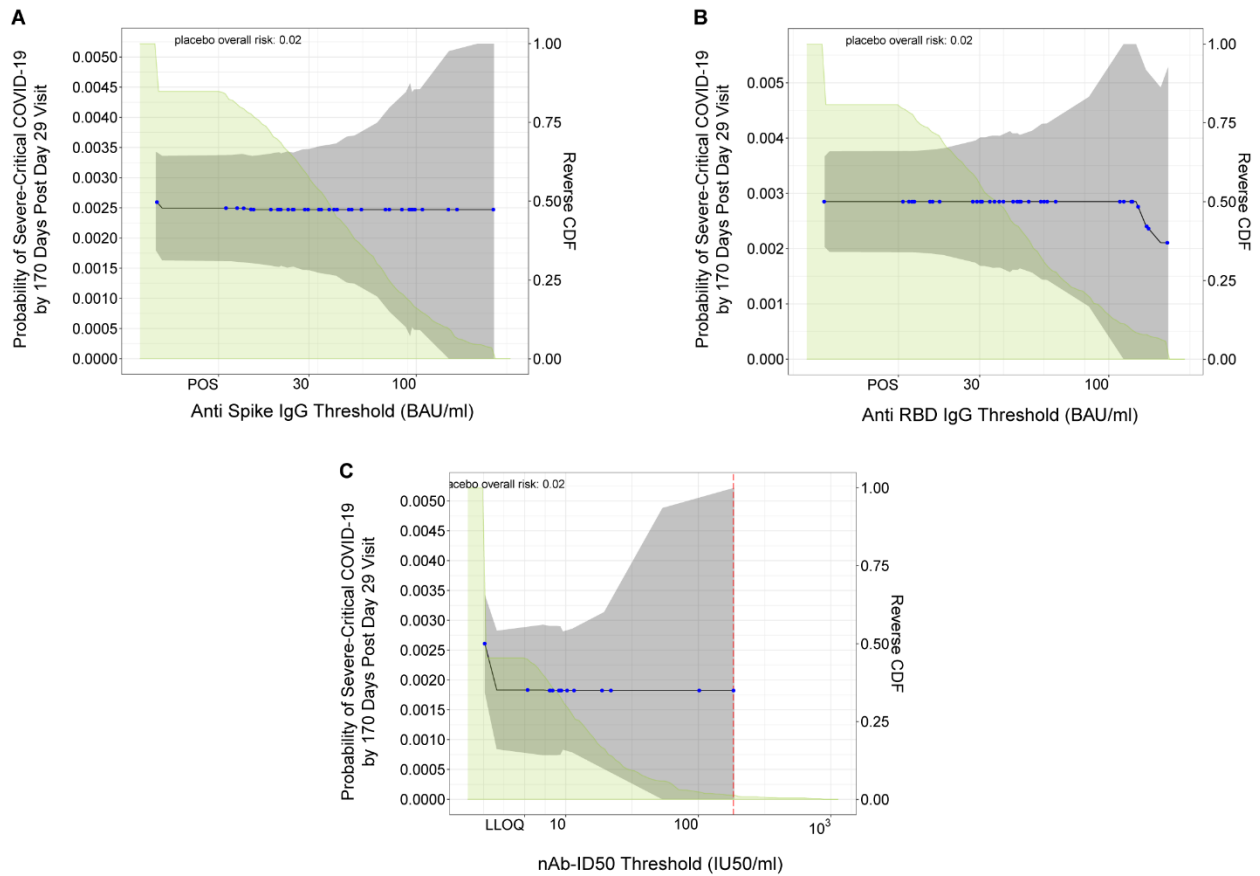

**Supplementary Fig. 26. Moderate COVID-19 risk by D29 antibody marker level above a threshold.**

Covariate-adjusted cumulative incidence of moderate COVID-19 by D29 (A) anti-Spike IgG concentration, (B) anti-RBD IgG concentration, or (C) neutralizing antibody titer (nAb-ID50) above a threshold in baseline SARS-CoV-2-seronegative per-protocol vaccine recipients. Incidence is shown through 181 days post D29. Blue dots are point estimates at each moderate COVID-19 endpoint linearly interpolated as shown by solid black lines; the grey shaded area indicates pointwise 95% CIs. The estimates and CIs were adjusted using the assumption that the true threshold-response is non-increasing. The upper boundary of the green shaded area is the estimate of the reverse cumulative distribution function (CDF) of D29 antibody marker level. The vertical red dashed line is the D29 antibody marker threshold above which no moderate COVID-19 endpoints occurred. Analyses adjusted for baseline behavioral risk score and geographic region. POS, positivity cutoff: 10.8424 BAU/ml for Spike and 14.0858 BAU/ml for RBD. LLOQ, lower limit of quantitation = 4.8975 IU50/ml for nAb-ID50.

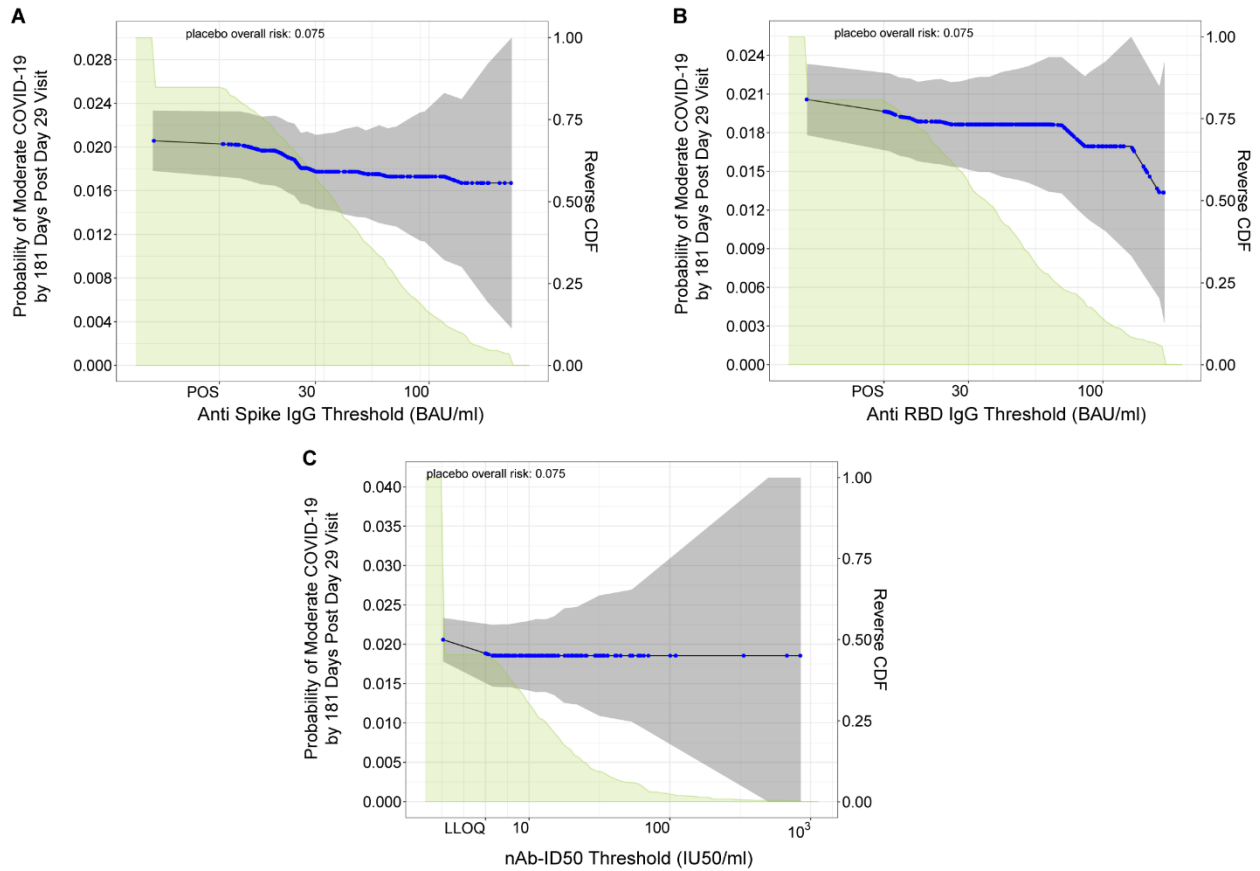

**Supplementary Fig. 27. Moderate to severe-critical COVID-19 risk by D29 antibody marker level *above* a threshold.** Covariate-adjusted cumulative incidence of moderate to severe-critical COVID-19 by D29 (A) anti-Spike IgG concentration, (B) anti-RBD IgG concentration, or (C) neutralizing antibody titer (nAb-ID50) *above* a threshold in baseline SARS-CoV-2–seronegative per-protocol vaccine recipients. Incidence is shown through 181 days post D29. Blue dots are point estimates at each moderate to severe-critical COVID-19 endpoint linearly interpolated as shown by solid black lines; the grey shaded area indicates pointwise 95% CIs. The estimates and CIs were adjusted using the assumption that the true threshold-response is non-increasing. The upper boundary of the green shaded area is the estimate of the reverse cumulative distribution function (CDF) of D29 antibody marker level. The vertical red dashed line is the D29 antibody marker threshold above which no moderate to severe-critical COVID-19 endpoints occurred. Analyses adjusted for baseline behavioral risk score and geographic region. POS, positivity cutoff: 10.8424 BAU/ml for Spike and 14.0858 BAU/ml for RBD. LLOQ, lower limit of quantitation = 4.8975 IU50/ml for nAb-ID50.

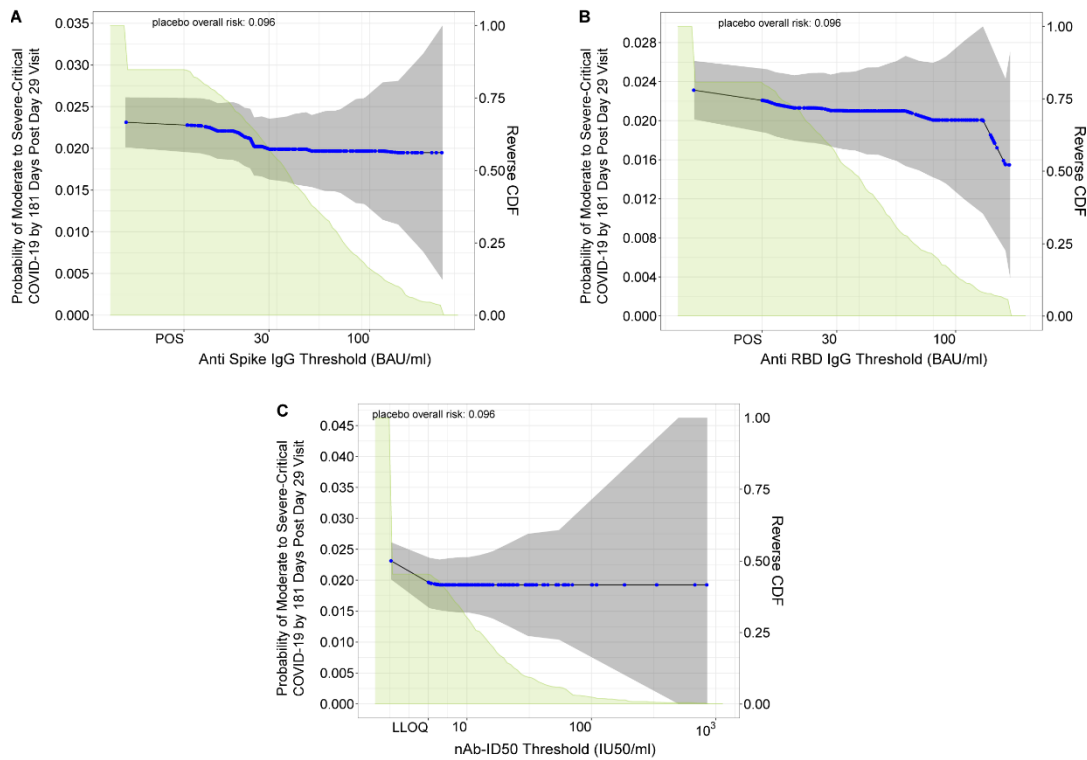

**Supplementary Fig. 28. Severe-critical COVID-19 risk by D29 antibody marker level above a threshold in participants in Latin America.** Covariate-adjusted cumulative incidence of severe-critical COVID-19 by D29 (A) anti-Spike IgG concentration, (B) anti-RBD IgG concentration, or (C) neutralizing antibody titer (nAb-ID50) above a threshold in baseline SARS-CoV-2-seronegative per-protocol vaccine recipients in Latin America. Incidence is shown through 170 days post D29. Blue dots are point estimates at each severe-critical COVID-19 endpoint linearly interpolated as shown by solid black lines; the grey shaded area indicates pointwise 95% CIs. The estimates and CIs were adjusted using the assumption that the true threshold-response is non-increasing. The upper boundary of the green shaded area is the estimate of the reverse cumulative distribution function (CDF) of D29 antibody marker level. The vertical red dashed line is the D29 antibody marker threshold above which no severe-critical COVID-19 endpoints occurred. Analyses adjusted for baseline behavioral risk score. POS, positivity cutoff: 10.8424 BAU/ml for Spike and 14.0858 BAU/ml for RBD. LLOQ, lower limit of quantitation = 4.8975 IU50/ml for nAb-ID50.

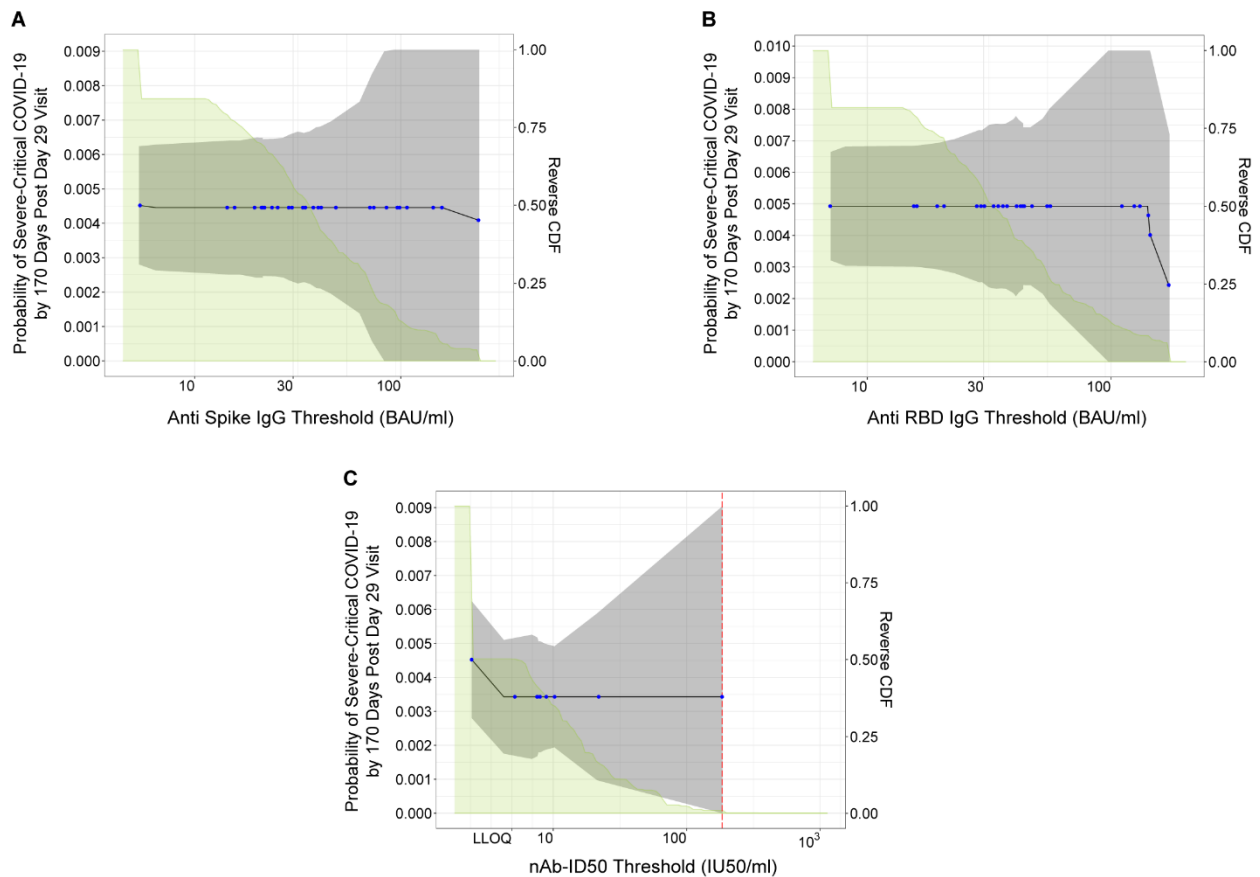

**Supplementary Fig. 29. Moderate COVID-19 risk by D29 antibody marker level *above* a threshold in participants in Latin America.** Covariate-adjusted cumulative incidence of moderate COVID-19 by D29 (A) anti-Spike IgG concentration, (B) anti-RBD IgG concentration, or (C) neutralizing antibody titer (nAb-ID50) *above* a threshold in baseline SARS-CoV-2–seronegative per-protocol vaccine recipients in Latin America. Incidence is shown through 181 days post D29. Blue dots are point estimates at each moderate COVID-19 endpoint linearly interpolated as shown by solid black lines; the grey shaded area indicates pointwise 95% CIs. The estimates and CIs were adjusted using the assumption that the true threshold-response is non-increasing. The upper boundary of the green shaded area is the estimate of the reverse cumulative distribution function (CDF) of D29 antibody marker level. The vertical red dashed line is the D29 antibody marker threshold above which no moderate COVID-19 endpoints occurred. Analyses adjusted for baseline behavioral risk score. POS, positivity cutoff: 10.8424 BAU/ml for Spike and 14.0858 BAU/ml for RBD. LLOQ, lower limit of quantitation = 4.8975 IU50/ml for nAb-ID50.

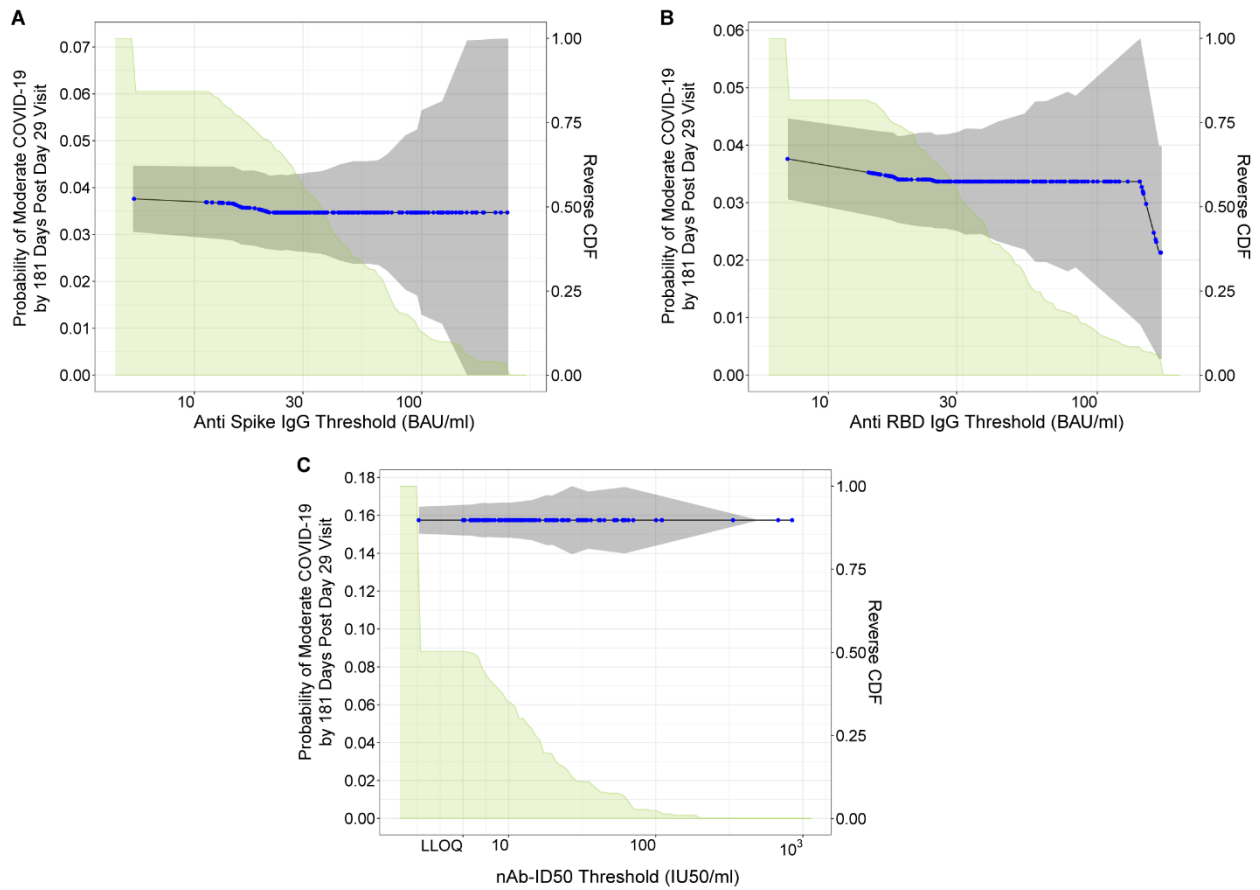

**Supplementary Fig. 30. Moderate to severe-critical COVID-19 risk by D29 antibody marker level above a threshold in participants in Latin America.** Covariate-adjusted cumulative incidence of moderate to severe-critical COVID-19 by D29 (A) anti-Spike IgG concentration, (B) anti-RBD IgG concentration, or (C) neutralizing antibody titer (nAb-ID50) above a threshold in baseline SARS-CoV-2-seronegative per-protocol vaccine recipients in Latin America. Incidence is shown through 181 days post D29. Blue dots are point estimates at each moderate to severe-critical COVID-19 endpoint linearly interpolated as shown by solid black lines; the grey shaded area indicates pointwise 95% CIs. The estimates and CIs were adjusted using the assumption that the true threshold-response is non-increasing. The upper boundary of the green shaded area is the estimate of the reverse cumulative distribution function (CDF) of D29 antibody marker level. The vertical red dashed line is the D29 antibody marker threshold above which no moderate to severe-critical COVID-19 endpoints occurred. Analyses adjusted for baseline behavioral risk score. POS, positivity cutoff: 10.8424 BAU/ml for Spike and 14.0858 BAU/ml for RBD. LLOQ, lower limit of quantitation = 4.8975 IU50/ml for nAb-ID50.

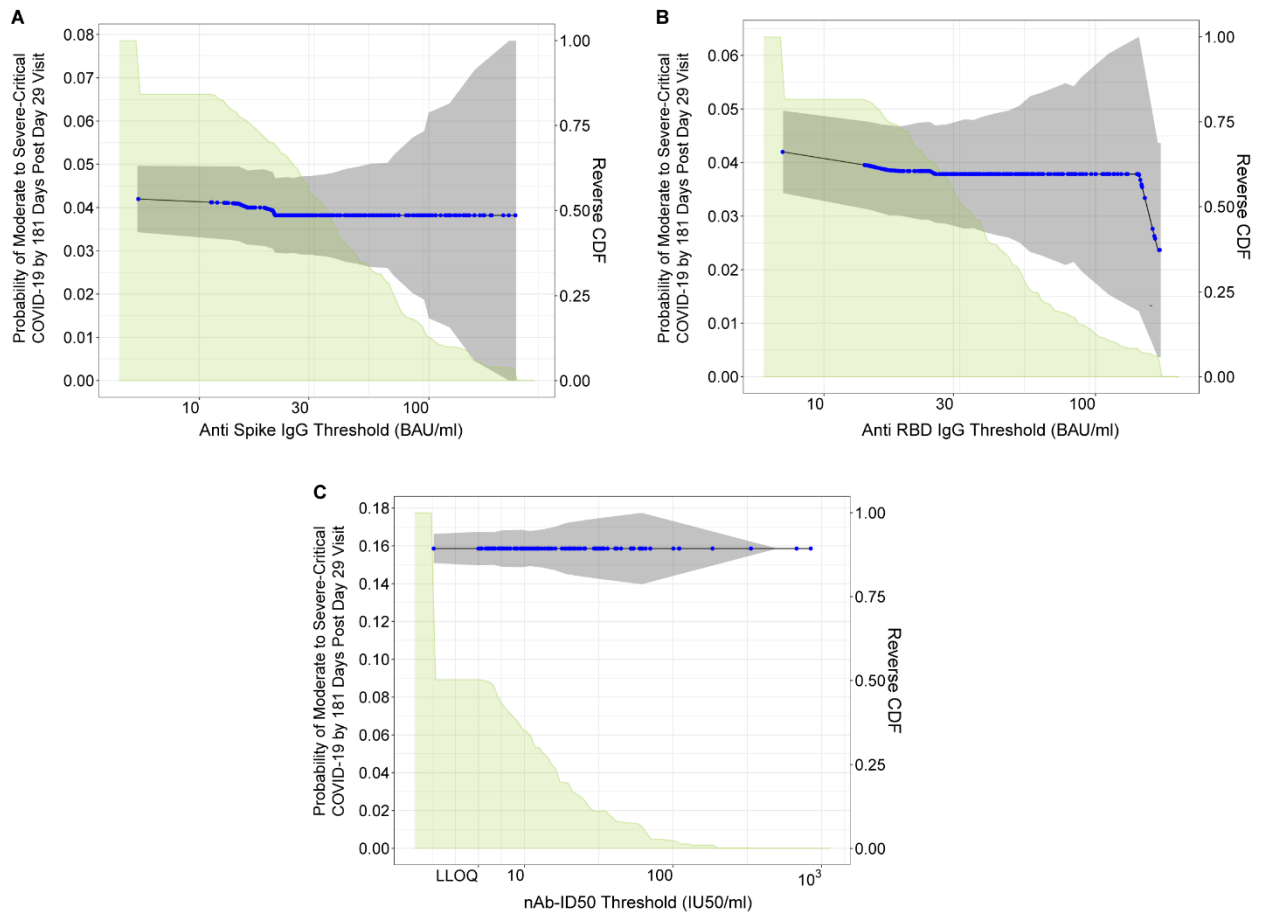

**Supplementary Fig. 31. Moderate to severe-critical COVID-19 risk by D29 antibody marker level above a threshold in participants in South Africa.** Covariate-adjusted cumulative incidence of moderate to severe-critical COVID-19 by D29 (A) anti-Spike IgG concentration, (B) anti-RBD IgG concentration, or (C) neutralizing antibody titer (nAb-ID50) above a threshold in baseline SARS-CoV-2-seronegative per-protocol vaccine recipients in South Africa. Incidence is shown through 101 days post D29. Blue dots are point estimates at each moderate to severe-critical COVID-19 endpoint linearly interpolated as shown by solid black lines; the grey shaded area indicates pointwise 95% CIs. The estimates and CIs were adjusted using the assumption that the true threshold-response is non-increasing. The upper boundary of the green shaded area is the estimate of the reverse cumulative distribution function (CDF) of D29 antibody marker level. The vertical red dashed line is the D29 antibody marker threshold above which no moderate to severe-critical COVID-19 endpoints occurred. Analyses adjusted for baseline behavioral risk score. POS, positivity cutoff: 10.8424 BAU/ml for Spike and 14.0858 BAU/ml for RBD. LLOQ, lower limit of quantitation = 4.8975 IU50/ml for nAb-ID50.

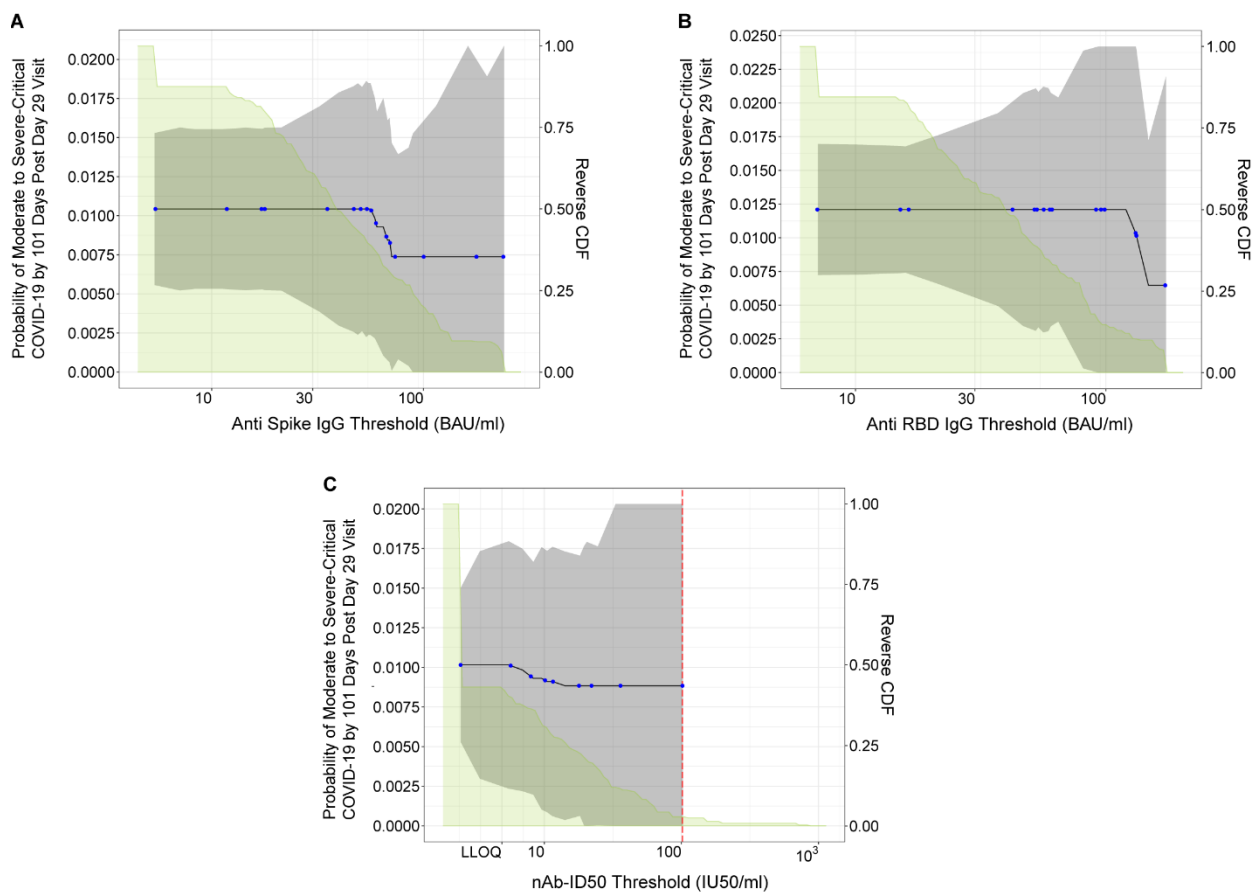

**Supplementary Fig. 32. Moderate to severe-critical COVID-19 risk by D29 antibody marker level above a threshold in participants in the United States.** Covariate-adjusted cumulative incidence of moderate to severe-critical COVID-19 by D29 (A) anti-Spike IgG concentration, (B) anti-RBD IgG concentration, or (C) neutralizing antibody titer (nAb-ID50) above a threshold in baseline SARS-CoV-2-seronegative per-protocol vaccine recipients in the United States. Incidence is shown through 109 days post D29. Blue dots are point estimates at each moderate to severe-critical COVID-19 endpoint linearly interpolated as shown by solid black lines; the grey shaded area indicates pointwise 95% CIs. The estimates and CIs were adjusted using the assumption that the true threshold-response is non-increasing. The upper boundary of the green shaded area is the estimate of the reverse cumulative distribution function (CDF) of D29 antibody marker level. The vertical red dashed line is the D29 antibody marker threshold above which no moderate to severe-critical COVID-19 endpoints occurred. Analyses adjusted for baseline behavioral risk score. POS, positivity cutoff: 10.8424 BAU/ml for Spike and 14.0858 BAU/ml for RBD. LLOQ, lower limit of quantitation = 4.8975 IU50/ml for nAb-ID50.

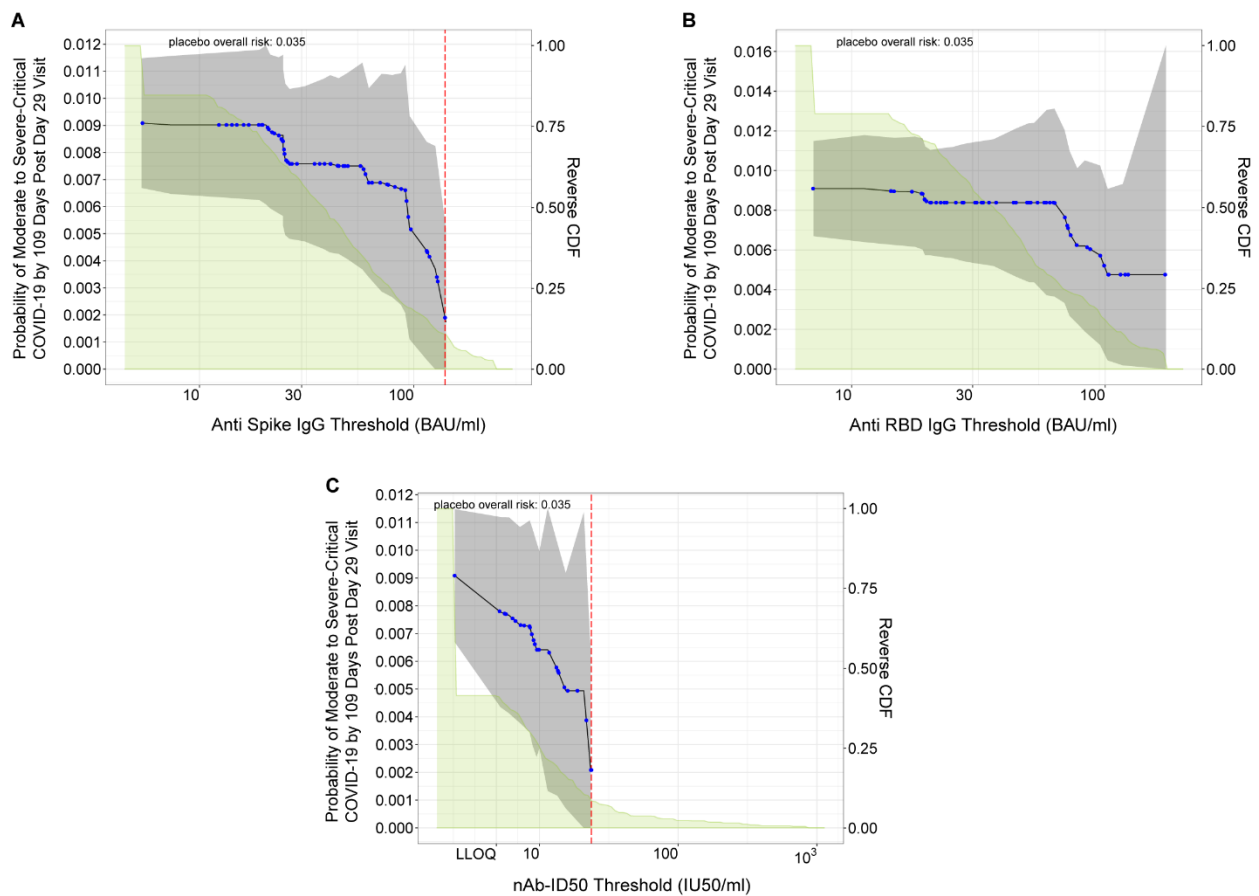



**Supplementary Fig. 33. Vaccine efficacy against severe-critical COVID-19 by D29 antibody marker level.** Analyses were performed in baseline SARS-CoV-2 seronegative per-protocol vaccine recipients. Estimates were obtained using (solid purple line) a Cox proportional hazards implementation of Gilbert et al.<sup>1</sup> or (solid blue line) a nonparametric implementation of Gilbert et al.<sup>1</sup> Each point on the curve represents the vaccine efficacy at the given D29 antibody marker level: **(A)** anti-Spike IgG concentration, **(B)** anti-RBD IgG concentration, **(C)** neutralizing antibody titer (nAb-ID50). The dotted lines indicate bootstrap pointwise 95% CIs. The green histograms are estimates of the frequency distribution of each D29 antibody marker, with the maroon dots representing the marker levels of the individual cases. Analyses adjusted for baseline behavioral risk score and geographic region. Nonparametric curves are plotted over the Spike IgG concentration range from negative response to the 90<sup>th</sup> percentile (125 BAU/ml), RBD IgG concentration range from negative response to the 90<sup>th</sup> percentile (118 BAU/ml), and nAb-ID50 titer range from unquantifiable to the 90<sup>th</sup> percentile (30.2 IU50/ml). Cox curves are plotted over the Spike IgG concentration range from negative response to the 97.5<sup>th</sup> percentile (238 BAU/ml), RBD IgG concentration range from negative response to the 97.5<sup>th</sup> percentile (173 BAU/ml), and nAb-ID50 titer range from unquantifiable to the 97.5<sup>th</sup> percentile (123 IU50/ml). Positivity cutoffs: 10.8424 BAU/ml for Spike and 14.0858 BAU/ml for RBD. nAb-ID50 LLOQ=4.8975 IU50/ml. BAU, binding antibody units; CI, confidence interval; IU, international units; LLOQ, lower limit of quantitation; nAb-ID50, 50% inhibitory dilution neutralizing antibody.

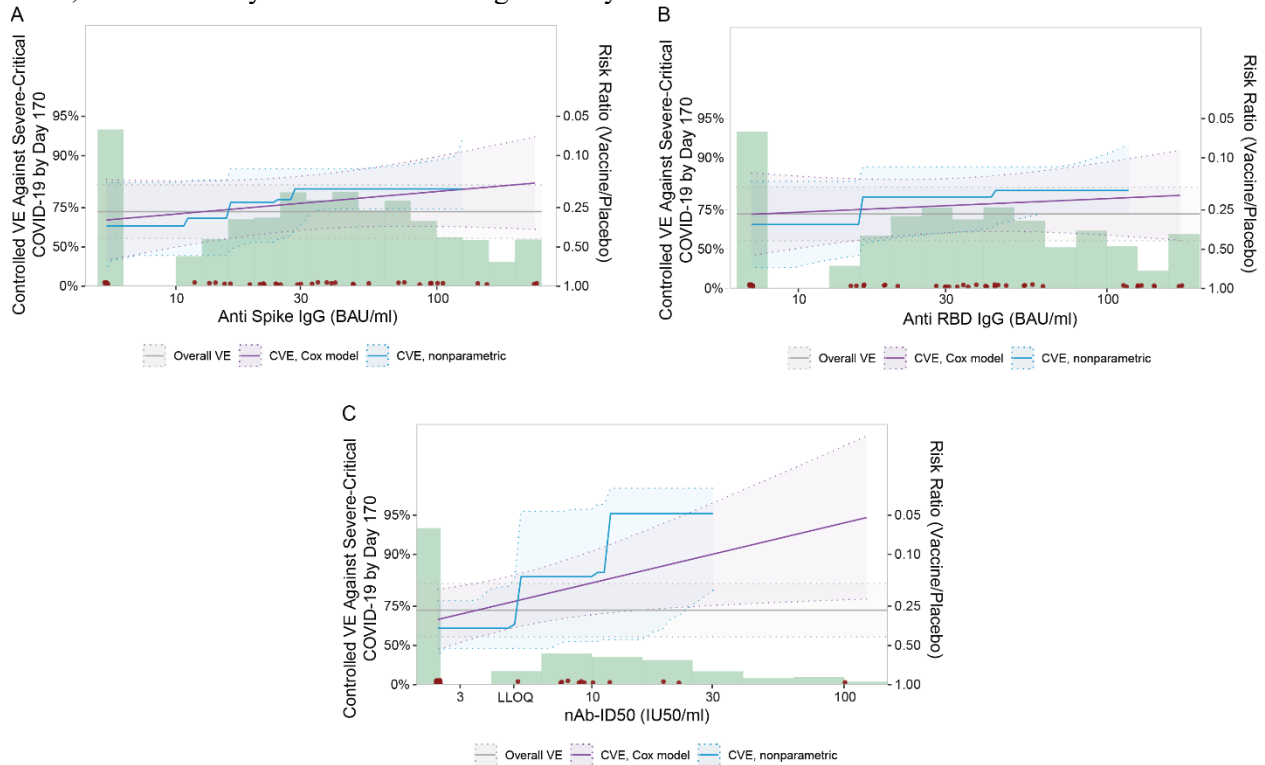

**Supplementary Fig. 34. Vaccine efficacy against moderate COVID-19 by D29 antibody marker level.** Analyses were performed in baseline SARS-CoV-2 seronegative per-protocol vaccine recipients. Estimates were obtained using (solid purple line) a Cox proportional hazards implementation of Gilbert et al.<sup>1</sup> or (solid blue line) a nonparametric implementation of Gilbert et al.<sup>1</sup> Each point on the curve represents the vaccine efficacy at the given D29 antibody marker level: **(A)** anti-Spike IgG concentration, **(B)** anti-RBD IgG concentration, **(C)** neutralizing antibody titer (nAb-ID50). The dotted lines indicate bootstrap pointwise 95% CIs. The green histograms are estimates of the frequency distribution of each D29 antibody marker, with the maroon dots representing the marker levels of the individual cases. Analyses adjusted for baseline behavioral risk score and geographic region. Nonparametric curves are plotted over the Spike IgG concentration range from negative response to the 90<sup>th</sup> percentile (125 BAU/ml), RBD IgG concentration range from negative response to the 90<sup>th</sup> percentile (118 BAU/ml), and nAb-ID50 titer range from unquantifiable to the 90<sup>th</sup> percentile (30.2 IU50/ml). Cox curves are plotted over the Spike IgG concentration range from negative response to the 97.5<sup>th</sup> percentile (238 BAU/ml), RBD IgG concentration range from negative response to the 97.5<sup>th</sup> percentile (173 BAU/ml), and nAb-ID50 titer range from unquantifiable to the 97.5<sup>th</sup> percentile (123 IU50/ml). Positivity cutoffs: 10.8424 BAU/ml for Spike and 14.0858 BAU/ml for RBD. nAb-ID50 LLOQ=4.8975 IU50/ml. BAU, binding antibody units; CI, confidence interval; IU, international units; LLOQ, lower limit of quantitation; nAb-ID50, 50% inhibitory dilution neutralizing antibody.

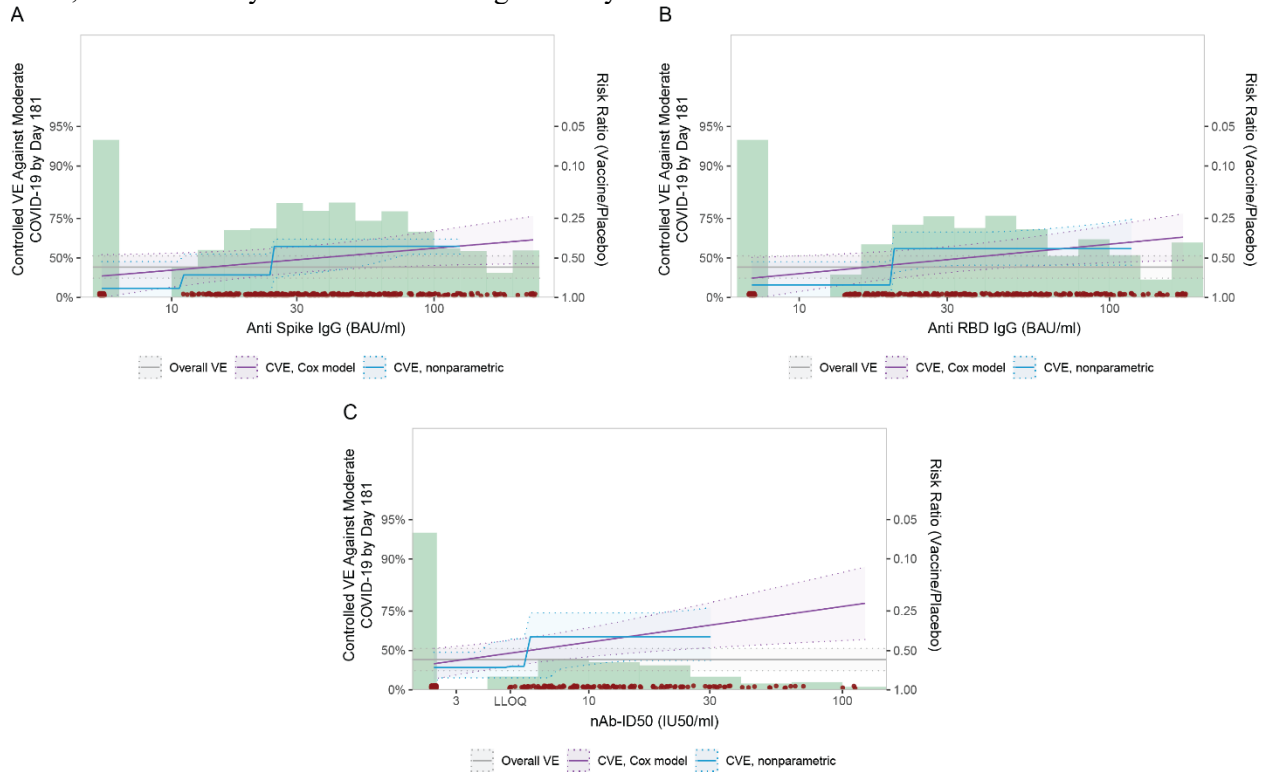

**Supplementary Fig. 35. Vaccine efficacy against moderate to severe-critical COVID-19 by D29 antibody marker level.** Analyses were performed in baseline SARS-CoV-2 seronegative per-protocol vaccine recipients. Estimates were obtained using (solid purple line) a Cox proportional hazards implementation of Gilbert et al.<sup>1</sup> or (solid blue line) a nonparametric implementation of Gilbert et al.<sup>1</sup> Each point on the curve represents the vaccine efficacy at the given D29 antibody marker level: **(A)** anti-Spike IgG concentration, **(B)** anti-RBD IgG concentration, **(C)** neutralizing antibody titer (nAb-ID50). The dotted lines indicate bootstrap pointwise 95% CIs. The green histograms are estimates of the frequency distribution of each D29 antibody marker, with the maroon dots representing the marker levels of the individual cases. Analyses adjusted for baseline behavioral risk score and geographic region. Nonparametric curves are plotted over the Spike IgG concentration range from negative response to the 90<sup>th</sup> percentile (125 BAU/ml), RBD IgG concentration range from negative response to the 90<sup>th</sup> percentile (118 BAU/ml), and nAb-ID50 titer range from unquantifiable to the 90<sup>th</sup> percentile (30.2 IU50/ml). Cox curves are plotted over the Spike IgG concentration range from negative response to the 97.5<sup>th</sup> percentile (238 BAU/ml), RBD IgG concentration range from negative response to the 97.5<sup>th</sup> percentile (173 BAU/ml), and nAb-ID50 titer range from unquantifiable to the 97.5<sup>th</sup> percentile (123 IU50/ml). Positivity cutoffs: 10.8424 BAU/ml for Spike and 14.0858 BAU/ml for RBD. nAb-ID50 LLOQ=4.8975 IU50/ml. BAU, binding antibody units; CI, confidence interval; IU, international units; LLOQ, lower limit of quantitation; nAb-ID50, 50% inhibitory dilution neutralizing antibody.

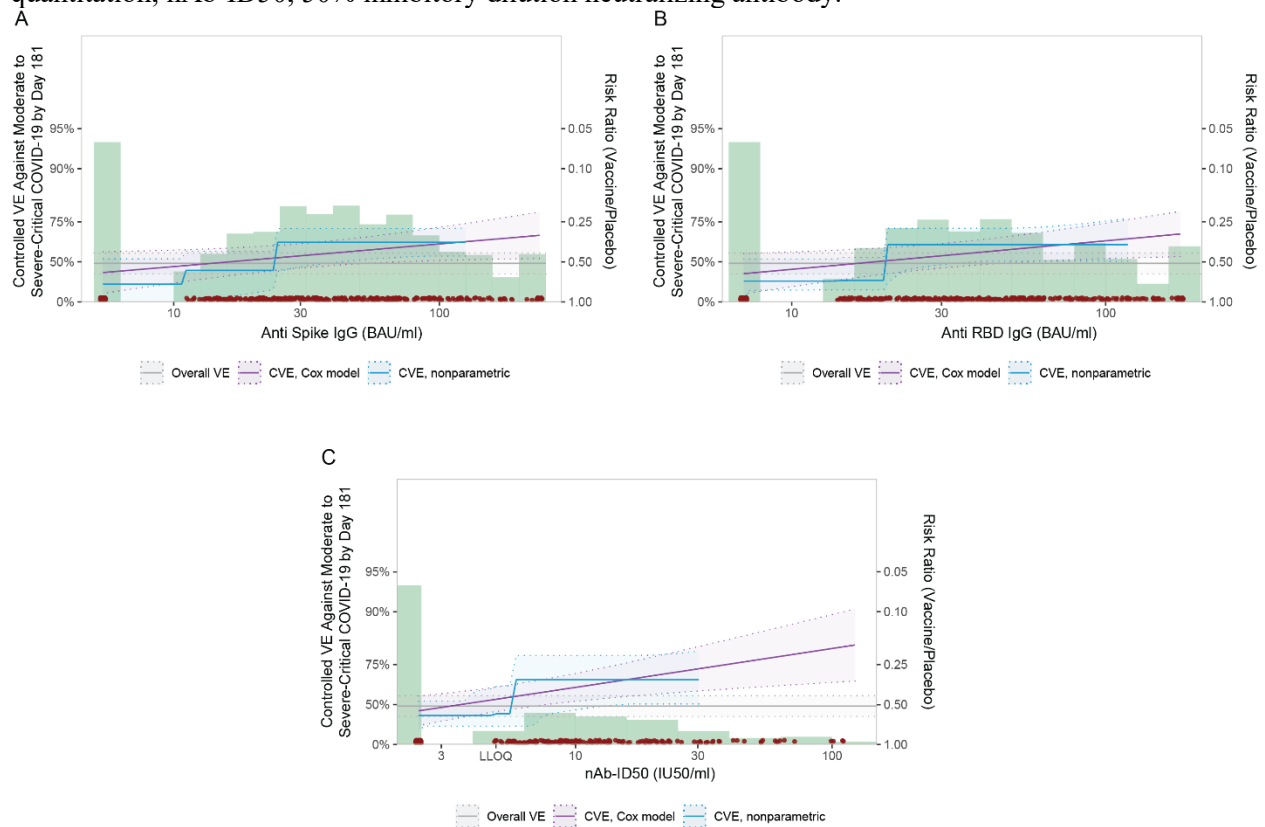

**Supplementary Fig. 36. Vaccine efficacy against severe-critical COVID-19 by D29 antibody marker level in participants in Latin America.** Analyses were performed in baseline SARS-CoV-2 seronegative per-protocol vaccine recipients in Latin America. Estimates were obtained using (solid purple line) a Cox proportional hazards implementation of Gilbert et al.<sup>1</sup> or (solid blue line) a nonparametric implementation of Gilbert et al.<sup>1</sup> Each point on the curve represents the vaccine efficacy at the given D29 antibody marker level: **(A)** anti-Spike IgG concentration, **(B)** anti-RBD IgG concentration, **(C)** neutralizing antibody titer (nAb-ID50). The dotted lines indicate bootstrap pointwise 95% CIs. The green histograms are estimates of the frequency distribution of each D29 antibody marker, with the maroon dots representing the marker levels of the individual cases. Analyses adjusted for baseline behavioral risk score. Nonparametric curves are plotted over the Spike IgG concentration range from negative response to the 90<sup>th</sup> percentile (121 BAU/ml), RBD IgG concentration range from negative response to the 90<sup>th</sup> percentile (114 BAU/ml), and nAb-ID50 titer range from unquantifiable to the 90<sup>th</sup> percentile (28.5 IU50/ml). Cox curves are plotted over the Spike IgG concentration range from negative response to the 97.5<sup>th</sup> percentile (238 BAU/ml), RBD IgG concentration range from negative response to the 97.5<sup>th</sup> percentile (173 BAU/ml), and nAb-ID50 titer range from unquantifiable to the 97.5<sup>th</sup> percentile (97.2 IU50/ml). Positivity cutoffs: 10.8424 BAU/ml for Spike and 14.0858 BAU/ml for RBD. nAb-ID50 LLOQ=4.8975 IU50/ml. BAU, binding antibody units; CI, confidence interval; IU, international units; LLOQ, lower limit of quantitation; nAb-ID50, 50% inhibitory dilution neutralizing antibody.

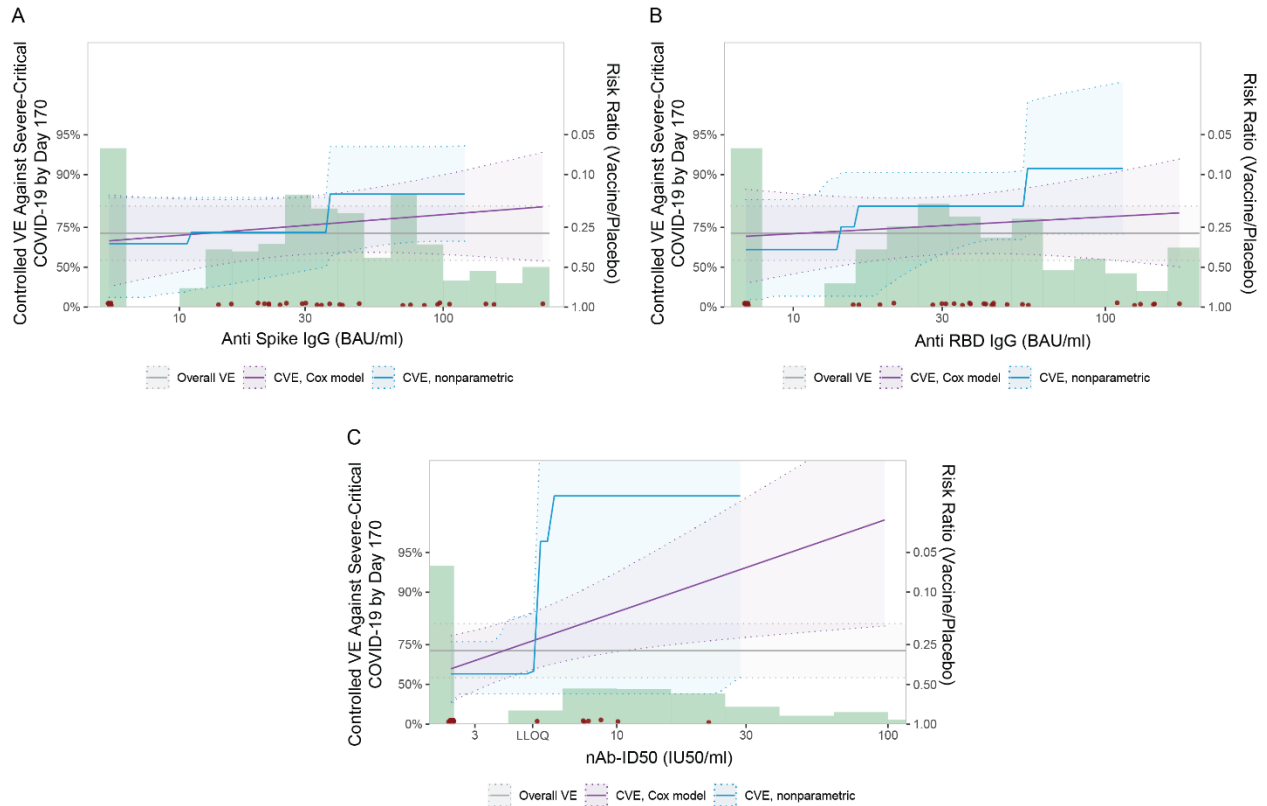

**Supplementary Fig. 37. Vaccine efficacy against moderate COVID-19 by D29 antibody marker level in participants in Latin America.** Analyses were performed in baseline SARS-CoV-2 seronegative per-protocol vaccine recipients in Latin America. Estimates were obtained using (solid purple line) a Cox proportional hazards implementation of Gilbert et al.<sup>1</sup> or (solid blue line) a nonparametric implementation of Gilbert et al.<sup>1</sup> Each point on the curve represents the vaccine efficacy at the given D29 antibody marker level: **(A)** anti-Spike IgG concentration, **(B)** anti-RBD IgG concentration, **(C)** neutralizing antibody titer (nAb-ID50). The dotted lines indicate bootstrap pointwise 95% CIs. The green histograms are estimates of the frequency distribution of each D29 antibody marker, with the maroon dots representing the marker levels of the individual cases. Analyses adjusted for baseline behavioral risk score. Nonparametric curves are plotted over the Spike IgG concentration range from negative response to the 90<sup>th</sup> percentile (121 BAU/ml), RBD IgG concentration range from negative response to the 90<sup>th</sup> percentile (114 BAU/ml), and nAb-ID50 titer range from unquantifiable to the 90<sup>th</sup> percentile (28.5 IU50/ml). Cox curves are plotted over the Spike IgG concentration range from negative response to the 97.5<sup>th</sup> percentile (238 BAU/ml), RBD IgG concentration range from negative response to the 97.5<sup>th</sup> percentile (173 BAU/ml), and nAb-ID50 titer range from unquantifiable to the 97.5<sup>th</sup> percentile (97.2 IU50/ml). Positivity cutoffs: 10.8424 BAU/ml for Spike and 14.0858 BAU/ml for RBD. nAb-ID50 LLOQ=4.8975 IU50/ml. BAU, binding antibody units; CI, confidence interval; IU, international units; LLOQ, lower limit of quantitation; nAb-ID50, 50% inhibitory dilution neutralizing antibody.

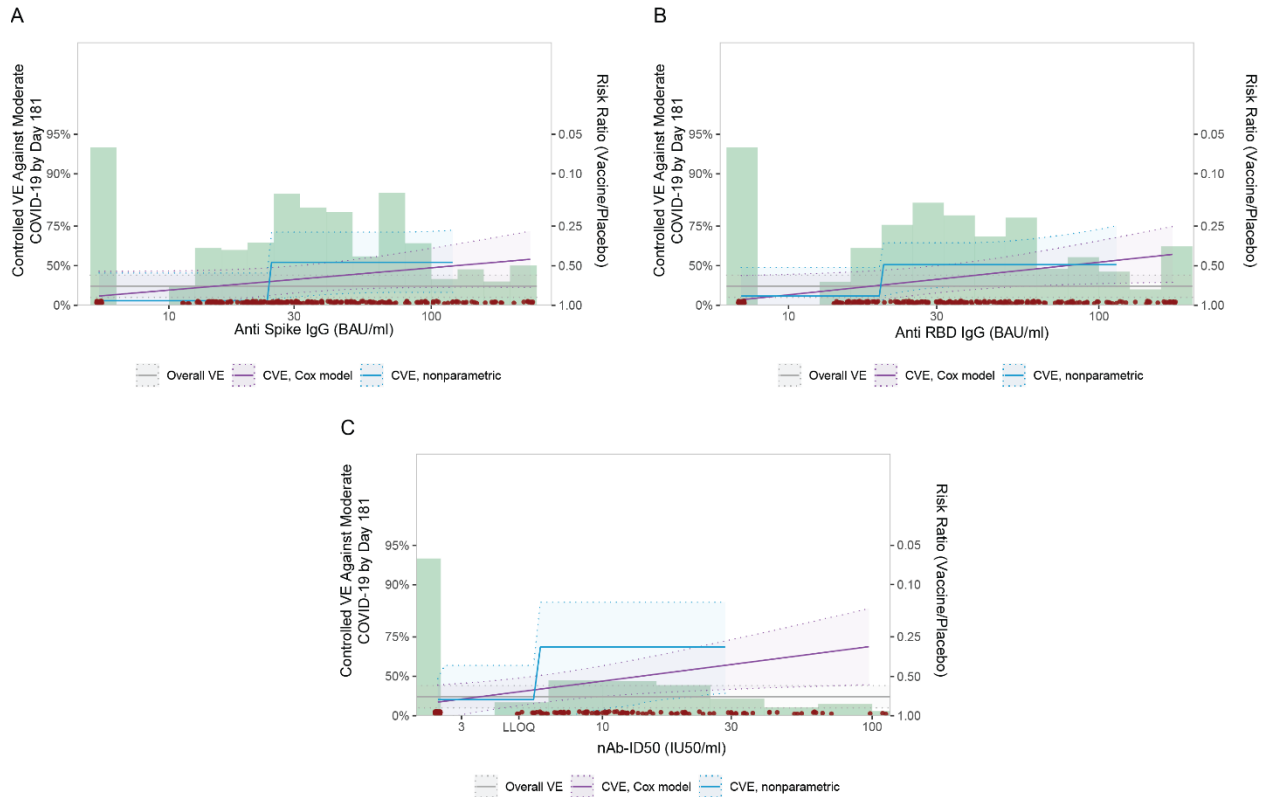

**Supplementary Fig. 38. Vaccine efficacy against moderate to severe-critical COVID-19 by D29 antibody marker level in participants in Latin America.** Analyses were performed in baseline SARS-CoV-2 seronegative per-protocol vaccine recipients in Latin America. Estimates were obtained using (solid purple line) a Cox proportional hazards implementation of Gilbert et al.<sup>1</sup> or (solid blue line) a nonparametric implementation of Gilbert et al.<sup>1</sup> Each point on the curve represents the vaccine efficacy at the given D29 antibody marker level: **(A)** anti-Spike IgG concentration, **(B)** anti-RBD IgG concentration, **(C)** neutralizing antibody titer (nAb-ID50). The dotted lines indicate bootstrap pointwise 95% CIs. The green histograms are estimates of the frequency distribution of each D29 antibody marker, with the maroon dots representing the marker levels of the individual cases. Analyses adjusted for baseline behavioral risk score. Nonparametric curves are plotted over the Spike IgG concentration range from negative response to the 90<sup>th</sup> percentile (121 BAU/ml), RBD IgG concentration range from negative response to the 90<sup>th</sup> percentile (114 BAU/ml), and nAb-ID50 titer range from unquantifiable to the 90<sup>th</sup> percentile (28.5 IU50/ml). Cox curves are plotted over the Spike IgG concentration range from negative response to the 97.5<sup>th</sup> percentile (238 BAU/ml), RBD IgG concentration range from negative response to the 97.5<sup>th</sup> percentile (173 BAU/ml), and nAb-ID50 titer range from unquantifiable to the 97.5<sup>th</sup> percentile (97.2 IU50/ml). Positivity cutoffs: 10.8424 BAU/ml for Spike and 14.0858 BAU/ml for RBD. nAb-ID50 LLOQ=4.8975 IU50/ml. BAU, binding antibody units; CI, confidence interval; IU, international units; LLOQ, lower limit of quantitation; nAb-ID50, 50% inhibitory dilution neutralizing antibody.

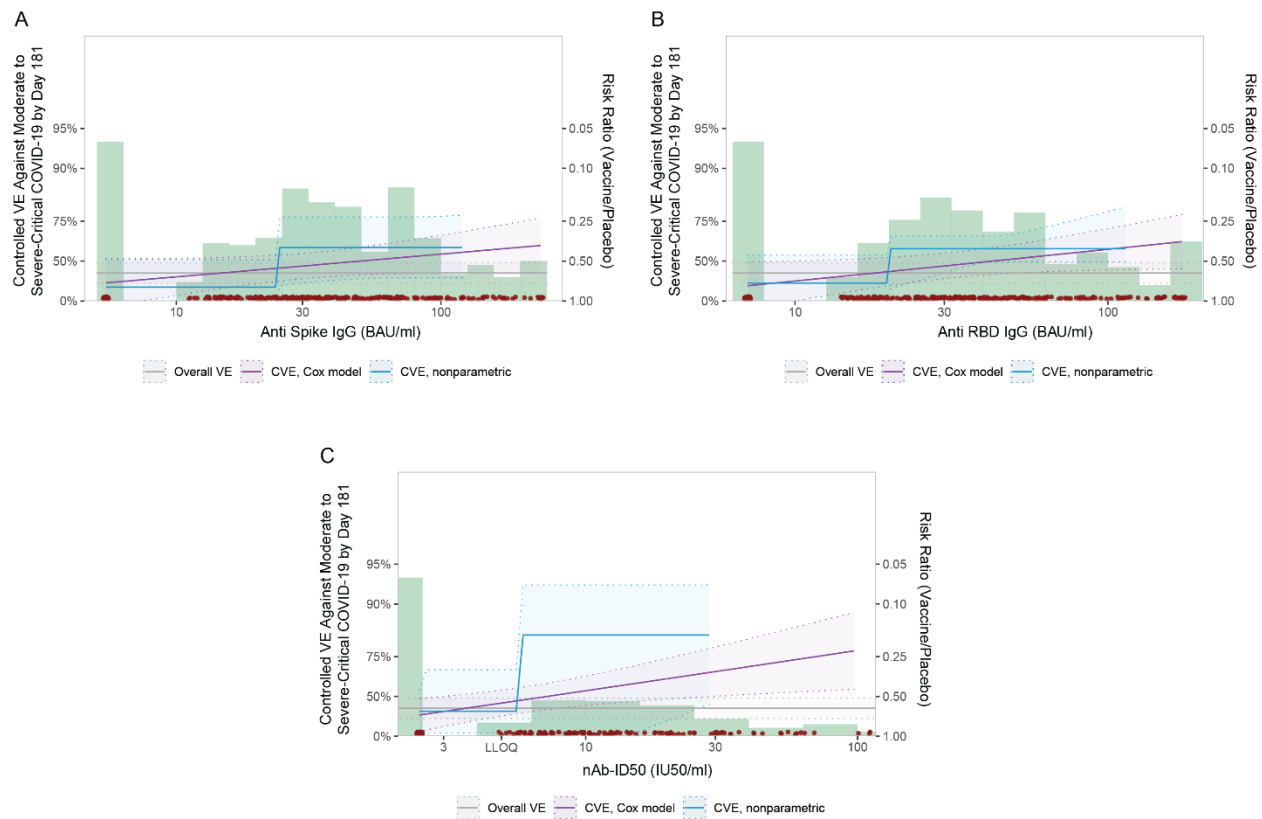

**Supplementary Fig. 39. Vaccine efficacy against moderate to severe-critical COVID-19 by D29 antibody marker level in participants in South Africa.** Analyses were performed in baseline SARS-CoV-2 seronegative per-protocol vaccine recipients in South Africa. Estimates were obtained using (solid purple line) a Cox proportional hazards implementation of Gilbert et al.<sup>1</sup> or (solid blue line) a nonparametric implementation of Gilbert et al.<sup>1</sup> Each point on the curve represents the vaccine efficacy at the given D29 antibody marker level: **(A)** anti-Spike IgG concentration, **(B)** anti-RBD IgG concentration, **(C)** neutralizing antibody titer (nAb-ID50). The dotted lines indicate bootstrap pointwise 95% CIs. The green histograms are estimates of the frequency distribution of each D29 antibody marker, with the maroon dots representing the marker levels of the individual cases. Analyses adjusted for baseline behavioral risk score. Nonparametric curves are plotted over the Spike IgG concentration range from negative response to the 90<sup>th</sup> percentile (125 BAU/ml), RBD IgG concentration range from negative response to the 90<sup>th</sup> percentile (125 BAU/ml), and nAb-ID50 titer range from unquantifiable to the 90<sup>th</sup> percentile (30.2 IU50/ml). Cox curves are plotted over the Spike IgG concentration range from negative response to the 97.5<sup>th</sup> percentile (238 BAU/ml), RBD IgG concentration range from negative response to the 97.5<sup>th</sup> percentile (173 BAU/ml), and nAb-ID50 titer range from unquantifiable to the 97.5<sup>th</sup> percentile (91.7 IU50/ml). Positivity cutoffs: 10.8424 BAU/ml for Spike and 14.0858 BAU/ml for RBD. nAb-ID50 LLOQ=4.8975 IU50/ml. BAU, binding antibody units; CI, confidence interval; IU, international units; LLOQ, lower limit of quantitation; nAb-ID50, 50% inhibitory dilution neutralizing antibody.

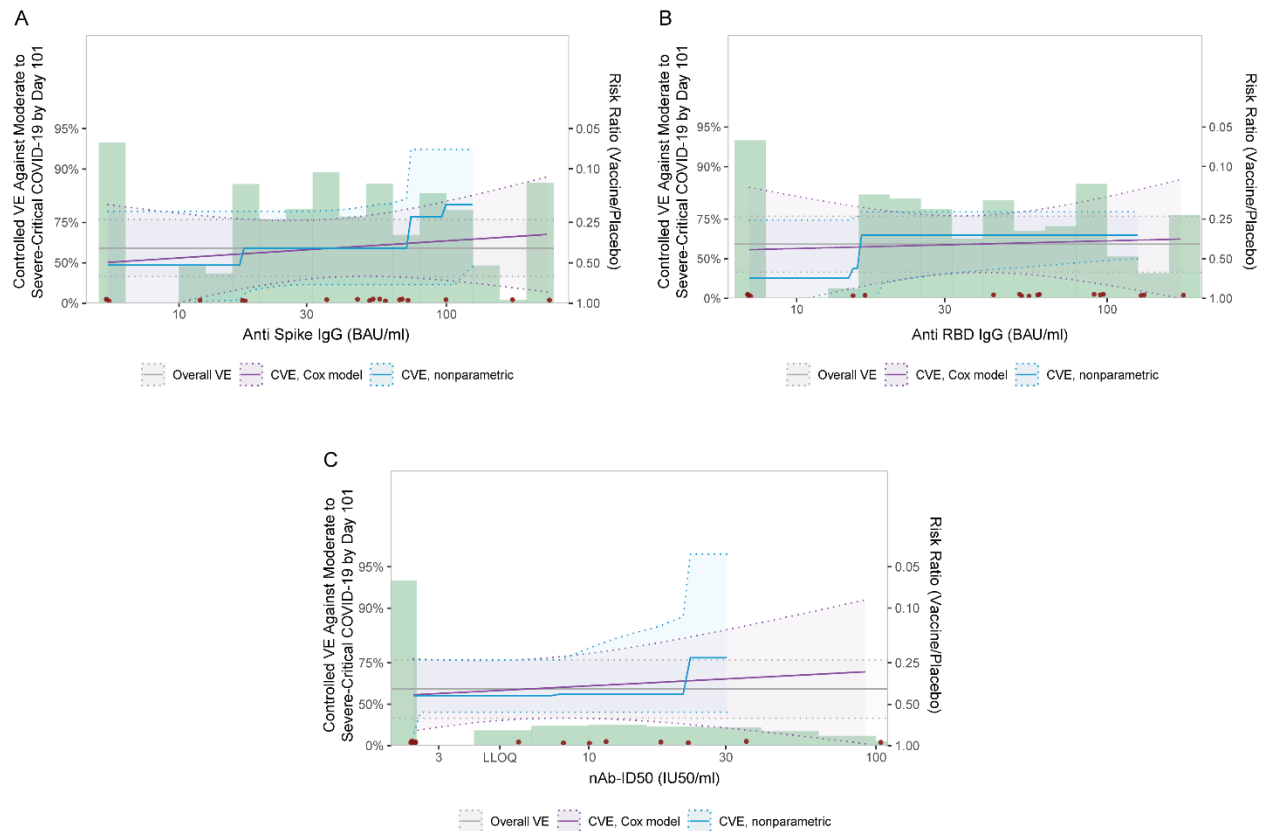

**Supplementary Fig. 40. Vaccine efficacy against moderate to severe-critical COVID-19 by D29 antibody marker level in participants in the United States.** Analyses were performed in baseline SARS-CoV-2 seronegative per-protocol vaccine recipients in the United States. Estimates were obtained using (solid purple line) a Cox proportional hazards implementation of Gilbert et al.<sup>1</sup> or (solid blue line) a nonparametric implementation of Gilbert et al.<sup>1</sup> Each point on the curve represents the vaccine efficacy at the given D29 antibody marker level: **(A)** anti-Spike IgG concentration, **(B)** anti-RBD IgG concentration, **(C)** neutralizing antibody titer (nAb-ID50). The dotted lines indicate bootstrap pointwise 95% CIs. The green histograms are estimates of the frequency distribution of each D29 antibody marker, with the maroon dots representing the marker levels of the individual cases. Analyses adjusted for baseline behavioral risk score. Nonparametric curves are plotted over the following ranges: Spike IgG, negative response to the 90% quantile (131 BAU/ml); RBD IgG, negative response to the 90% quantile (117 BAU/ml); nAb-ID50, unquantifiable titer to the 90% quantile (28.9 IU50/ml). Cox model curves are plotted over the following ranges: Spike IgG, negative response to the 97.5% quantile (209 BAU/ml); RBD IgG, negative response to the 97.5% quantile (201 BAU/ml); nAb-ID50, unquantifiable titer to the 97.5% quantile (157 IU50/ml). Positivity cutoffs: 10.8424 BAU/ml for Spike and 14.0858 BAU/ml for RBD. nAb-ID50 LLOQ=4.8975 IU50/ml. BAU, binding antibody units; CI, confidence interval; CVE, controlled vaccine efficacy; IU, international units; nAb-ID50, 50% inhibitory dilution neutralizing antibody.

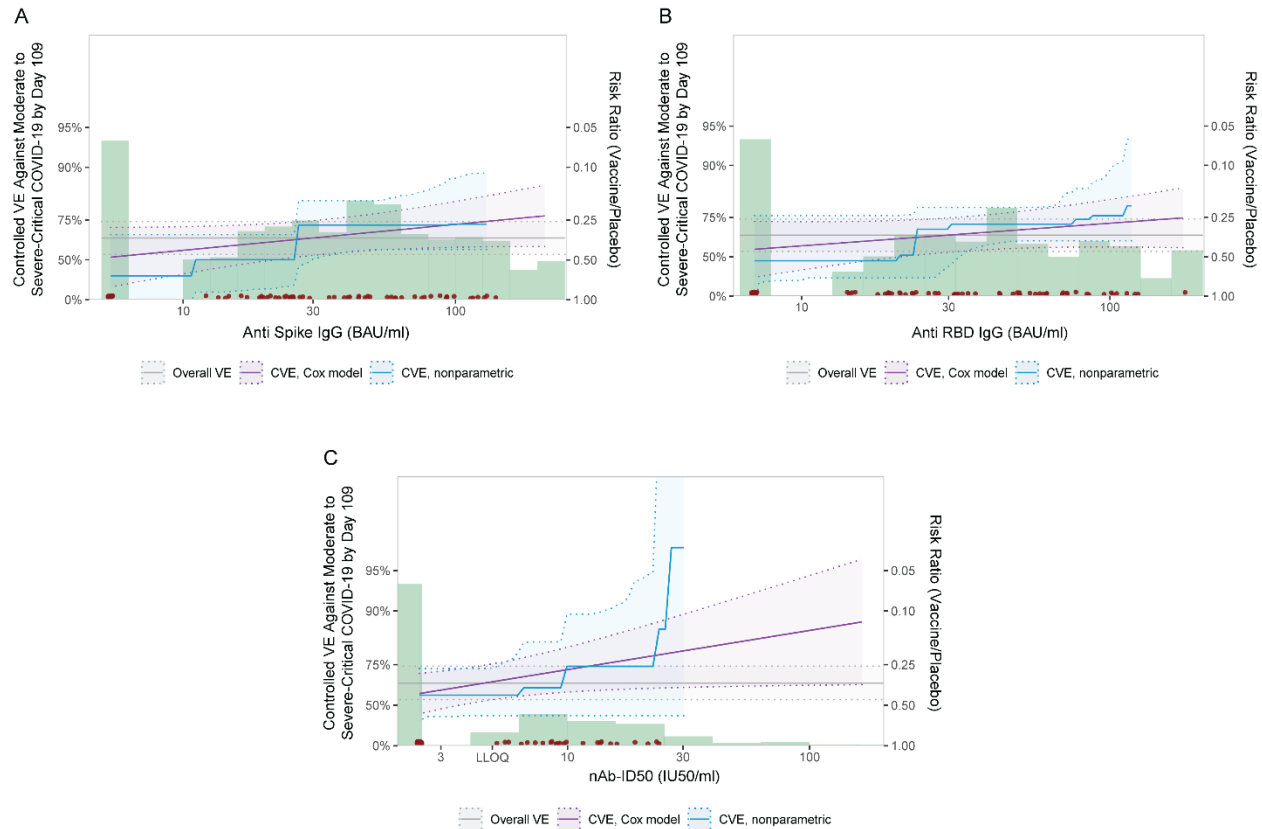



**Supplementary Fig. 41. Vaccine efficacy with sensitivity analysis against severe-critical COVID-19 by D29 antibody marker level.** Analyses were performed in baseline SARS-CoV-2 seronegative per-protocol vaccine recipients. Estimates were obtained using the method of Gilbert et al.<sup>1</sup> Each point on the curve represents the vaccine efficacy at the given D29 antibody marker level: **(A)** anti-Spike IgG concentration, **(B)** anti-RBD IgG concentration, **(C)** neutralizing antibody titer (nAb-ID50). The pink solid line is point estimates assuming no unmeasured confounding; the dashed lines are bootstrap pointwise 95% CIs. The red solid line is point estimates assuming unmeasured confounding in a sensitivity analysis (dashed lines are bootstrap pointwise 95% CIs); see the Statistical Analysis Plan for details. The upper boundary of the green shaded area is the estimate of the reverse cumulative distribution function of the marker in baseline SARS-CoV-2 negative per-protocol vaccine recipients. Analyses adjusted for baseline behavioral risk score and geographic region. Curves are plotted over the range from the 2.5th percentile to the 97.5th percentile of each marker: Spike IgG, negative response to 238 BAU/ml; RBD IgG, negative response to 173 BAU/ml; nAb-ID50, unquantifiable to 130 IU50/ml. BAU, binding antibody units; CI, confidence interval; IU, international units; nAb-ID50, 50% inhibitory dilution neutralizing antibody. OS, positivity cutoff: 10.8424 BAU/ml for Spike and 14.0858 BAU/ml for RBD. LLOQ, lower limit of quantitation = 4.8975 IU50/ml for nAb-ID50.

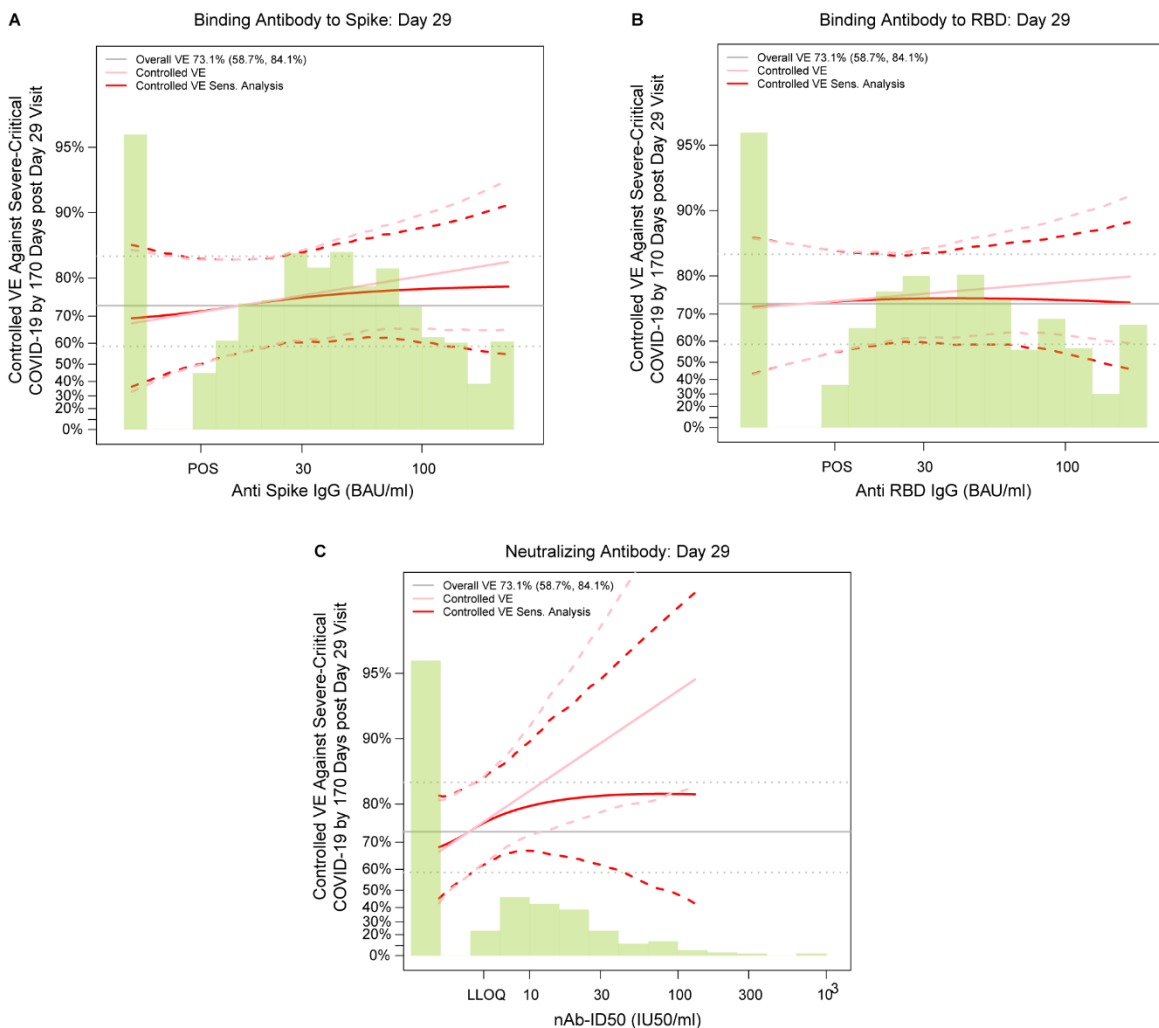

**Supplementary Fig. 42. Vaccine efficacy with sensitivity analysis against moderate COVID-19 by D29 antibody marker level.** Analyses were performed in baseline SARS-CoV-2 seronegative per-protocol vaccine recipients. Estimates were obtained using the method of Gilbert et al.<sup>1</sup> Each point on the curve represents the vaccine efficacy at the given D29 antibody marker level: **(A)** anti-Spike IgG concentration, **(B)** anti-RBD IgG concentration, **(C)** neutralizing antibody titer (nAb-ID50). The pink solid line is point estimates assuming no unmeasured confounding; the dashed lines are bootstrap pointwise 95% CIs. The red solid line is point estimates assuming unmeasured confounding in a sensitivity analysis (dashed lines are bootstrap pointwise 95% CIs); see the Statistical Analysis Plan for details. The upper boundary of the green shaded area is the estimate of the reverse cumulative distribution function of the marker in baseline SARS-CoV-2 negative per-protocol vaccine recipients. Analyses adjusted for baseline behavioral risk score and geographic region. Curves are plotted over the range from the 2.5th percentile to the 97.5th percentile of each marker: Spike IgG, negative response to 238 BAU/ml; RBD IgG, negative response to 173 BAU/ml; nAb-ID50, unquantifiable to 130 IU50/ml. BAU, binding antibody units; CI, confidence interval; IU, international units; nAb-ID50, 50% inhibitory dilution neutralizing antibody. POS, positivity cutoff: 10.8424 BAU/ml for Spike and 14.0858 BAU/ml for RBD. LLOQ, lower limit of quantitation = 4.8975 IU50/ml for nAb-ID50.

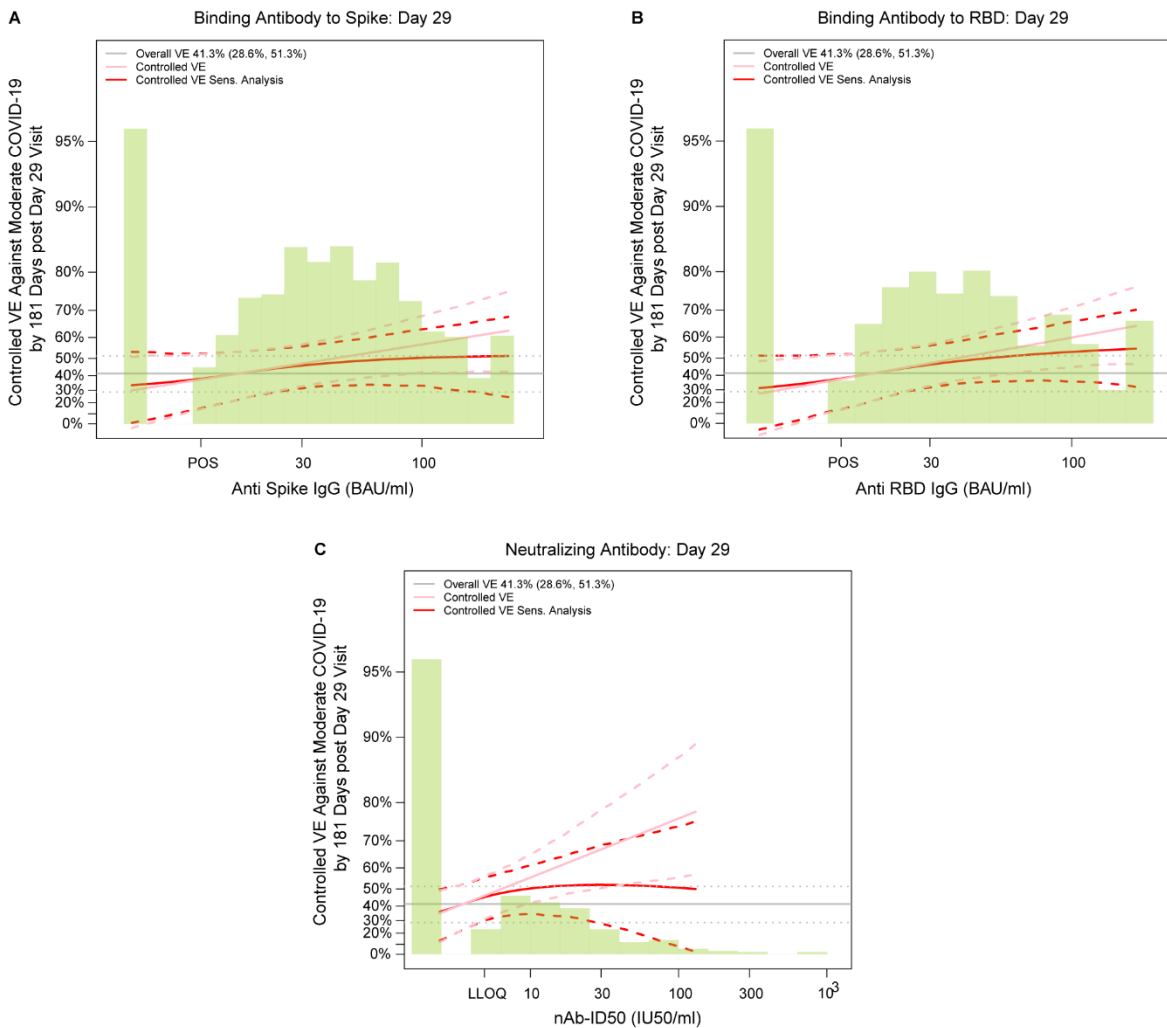

**Supplementary Fig. 43. Vaccine efficacy with sensitivity analysis against moderate to severe-critical COVID-19 by D29 antibody marker level.** Analyses were performed in baseline SARS-CoV-2 seronegative per-protocol vaccine recipients. Estimates were obtained using the method of Gilbert et al.<sup>1</sup> Each point on the curve represents the vaccine efficacy at the given D29 antibody marker level: **(A)** anti-Spike IgG concentration, **(B)** anti-RBD IgG concentration, **(C)** neutralizing antibody titer (nAb-ID50). The pink solid line is point estimates assuming no unmeasured confounding; the dashed lines are bootstrap pointwise 95% CIs. The red solid line is point estimates assuming unmeasured confounding in a sensitivity analysis (dashed lines are bootstrap pointwise 95% CIs); see the Statistical Analysis Plan for details. The upper boundary of the green shaded area is the estimate of the reverse cumulative distribution function of the marker in baseline SARS-CoV-2 negative per-protocol vaccine recipients. Analyses adjusted for baseline behavioral risk score and geographic region. Curves are plotted over the range from the 2.5th percentile to the 97.5th percentile of each marker: Spike IgG, negative response to 238 BAU/ml; RBD IgG, negative response to 173 BAU/ml; nAb-ID50, unquantifiable to 130 IU50/ml. BAU, binding antibody units; CI, confidence interval; IU, international units; nAb-ID50, 50% inhibitory dilution neutralizing antibody. POS, positivity cutoff: 10.8424 BAU/ml for Spike and 14.0858 BAU/ml for RBD. LLOQ, lower limit of quantitation = 4.8975 IU50/ml for nAb-ID50.

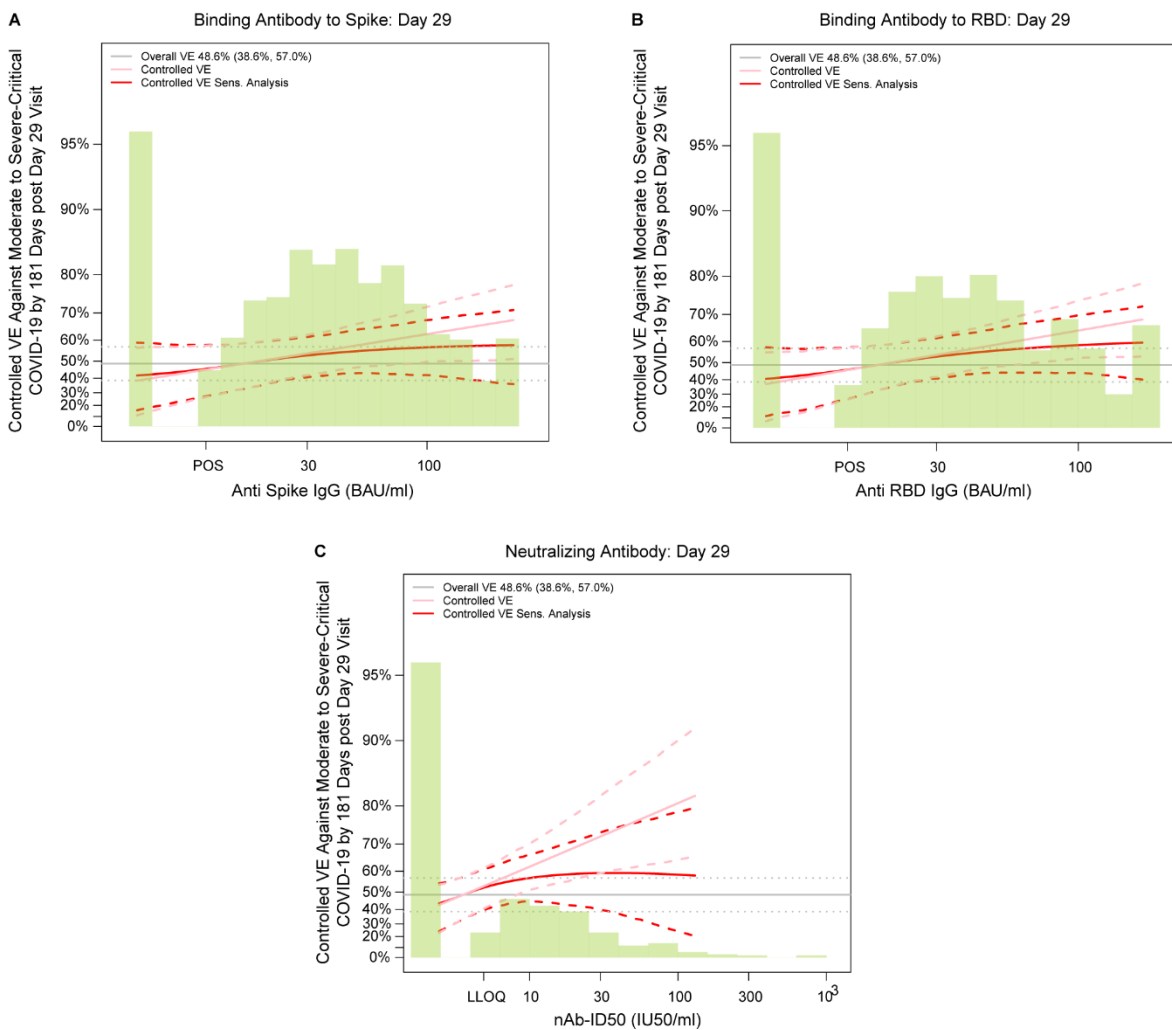

**Supplementary Fig. 44. Vaccine efficacy with sensitivity analysis against severe-critical COVID-19 by D29 antibody marker level in participants in Latin America.** Analyses were performed in baseline SARS-CoV-2 seronegative per-protocol vaccine recipients in Latin America. Estimates were obtained using the method of Gilbert et al.<sup>1</sup> Each point on the curve represents the vaccine efficacy at the given D29 antibody marker level: **(A)** anti-Spike IgG concentration, **(B)** anti-RBD IgG concentration, **(C)** neutralizing antibody titer (nAb-ID50). The pink solid line is point estimates assuming no unmeasured confounding; the dashed lines are bootstrap pointwise 95% CIs. The red solid line is point estimates assuming unmeasured confounding in a sensitivity analysis (dashed lines are bootstrap pointwise 95% CIs); see the Statistical Analysis Plan for details. The upper boundary of the green shaded area is the estimate of the reverse cumulative distribution function of the marker in baseline SARS-CoV-2 negative per-protocol vaccine recipients in Latin America. Analyses adjusted for baseline behavioral risk score. Curves are plotted over the range from the 2.5th percentile to the 97.5th percentile of each marker: Spike IgG, negative response to 238 BAU/ml; RBD IgG, negative response to 173 BAU/ml; nAb-ID50, unquantifiable to 109 IU50/ml. BAU, binding antibody units; CI, confidence interval; IU, international units; nAb-ID50, 50% inhibitory dilution neutralizing antibody. Positivity cutoffs: 10.8424 BAU/ml for Spike and 14.0858 BAU/ml for RBD. LLOQ, lower limit of quantitation = 4.8975 IU50/ml for nAb-ID50.

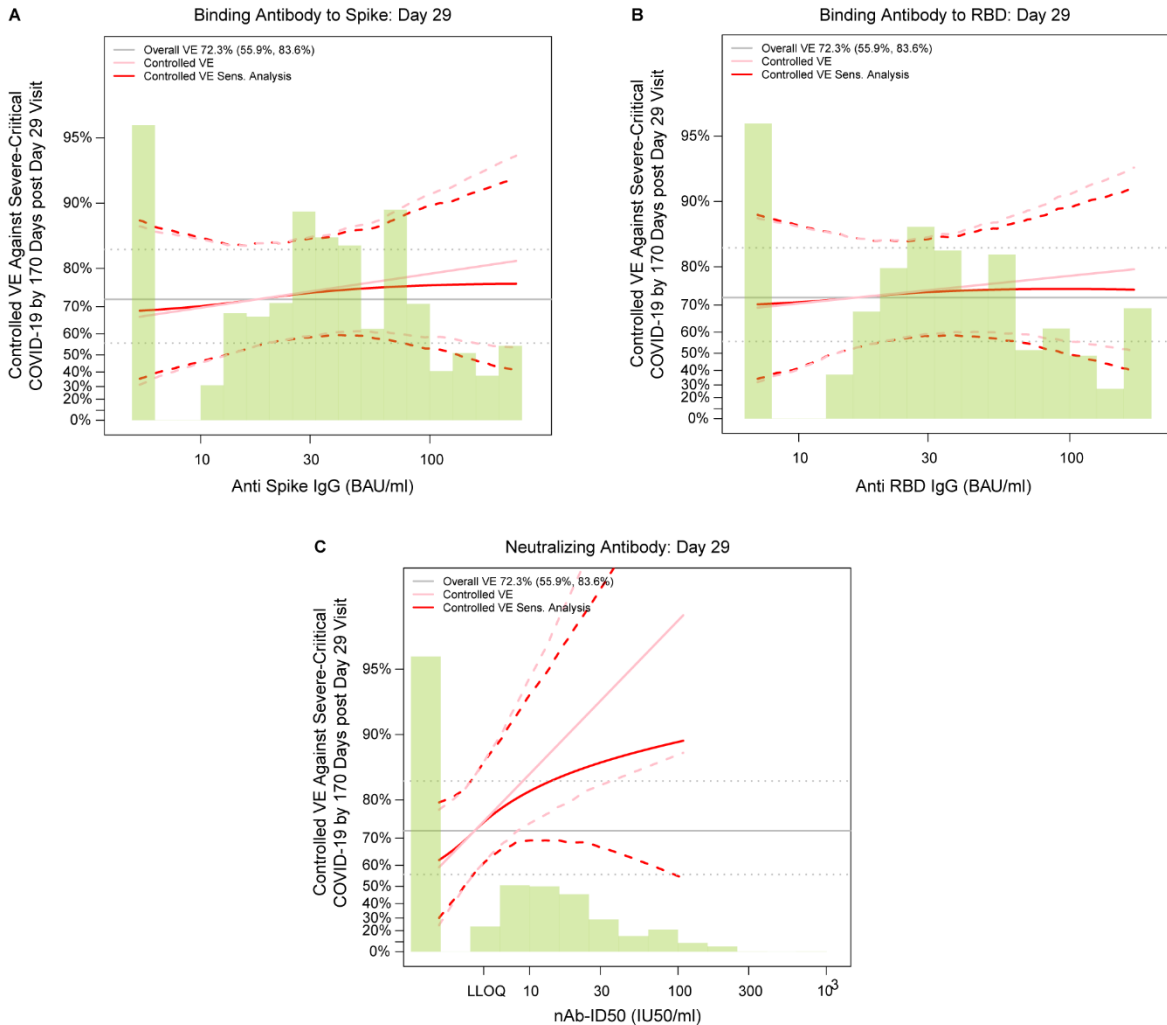

**Supplementary Fig. 45. Vaccine efficacy with sensitivity analysis against moderate COVID-19 by D29 antibody marker level in participants in Latin America.** Analyses were performed in baseline SARS-CoV-2 seronegative per-protocol vaccine recipients in Latin America. Estimates were obtained using the method of Gilbert et al.<sup>1</sup> Each point on the curve represents the vaccine efficacy at the given D29 antibody marker level: **(A)** anti-Spike IgG concentration, **(B)** anti-RBD IgG concentration, **(C)** neutralizing antibody titer (nAb-ID50). The pink solid line is point estimates assuming no unmeasured confounding; the dashed lines are bootstrap pointwise 95% CIs. The red solid line is point estimates assuming unmeasured confounding in a sensitivity analysis (dashed lines are bootstrap pointwise 95% CIs); see the Statistical Analysis Plan for details. The upper boundary of the green shaded area is the estimate of the reverse cumulative distribution function of the marker in baseline SARS-CoV-2 negative per-protocol vaccine recipients in Latin America. Analyses adjusted for baseline behavioral risk score. Curves are plotted over the range from the 2.5th percentile to the 97.5th percentile of each marker: Spike IgG, negative response to 238 BAU/ml; RBD IgG, negative response to 173 BAU/ml; nAb-ID50, unquantifiable to 109 IU50/ml. BAU, binding antibody units; CI, confidence interval; IU, international units; nAb-ID50, 50% inhibitory dilution neutralizing antibody. Positivity cutoffs: 10.8424 BAU/ml for Spike and 14.0858 BAU/ml for RBD. LLOQ, lower limit of quantitation = 4.8975 IU50/ml for nAb-ID50.

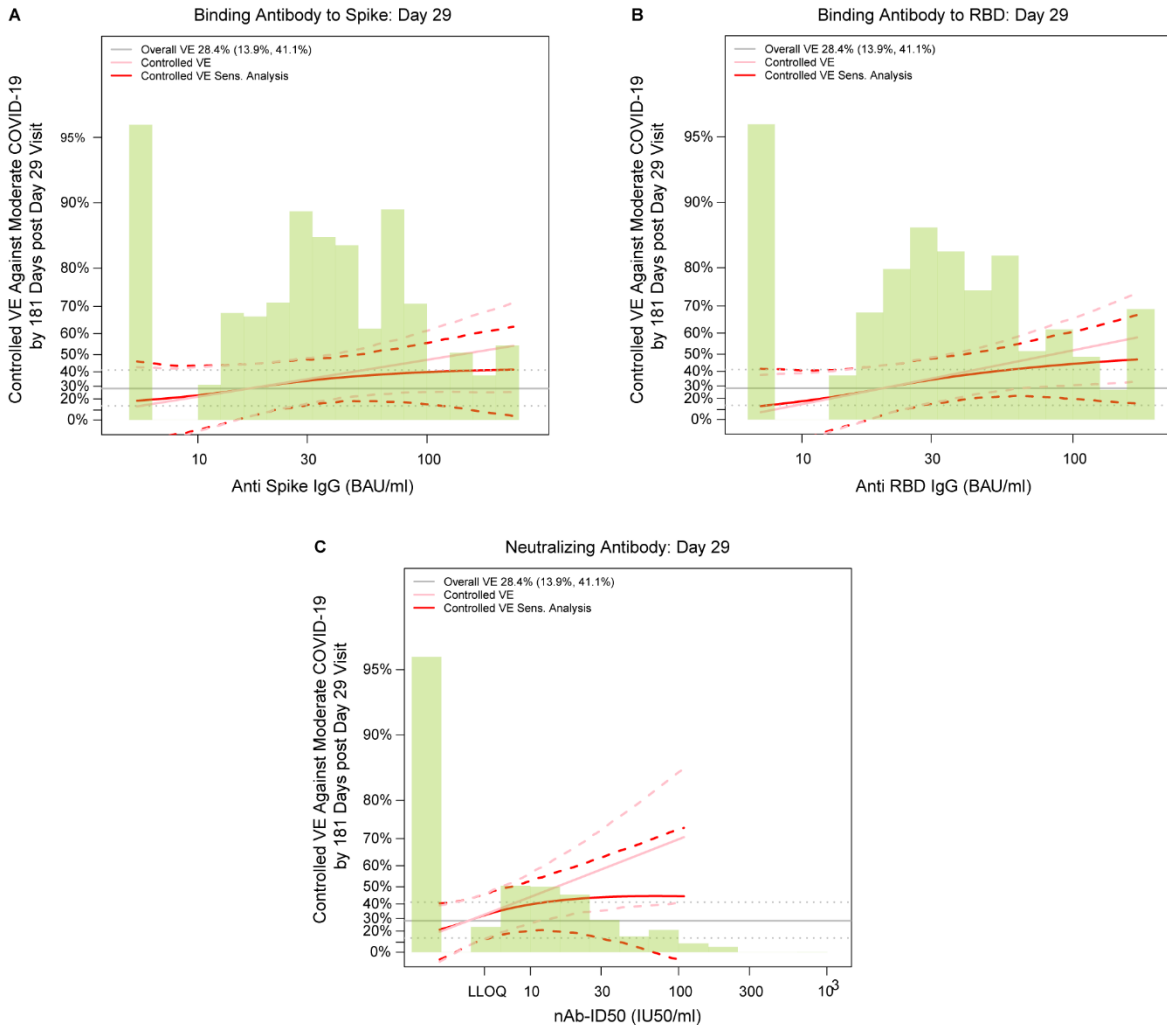

**Supplementary Fig. 46. Vaccine efficacy with sensitivity analysis against moderate to severe-critical COVID-19 by D29 antibody marker level in participants in Latin America.** Analyses were performed in baseline SARS-CoV-2 seronegative per-protocol vaccine recipients in Latin America. Estimates were obtained using the method of Gilbert et al.<sup>1</sup> Each point on the curve represents the vaccine efficacy at the given D29 antibody marker level: **(A)** anti-Spike IgG concentration, **(B)** anti-RBD IgG concentration, **(C)** neutralizing antibody titer (nAb-ID50). The pink solid line is point estimates assuming no unmeasured confounding; the dashed lines are bootstrap pointwise 95% CIs. The red solid line is point estimates assuming unmeasured confounding in a sensitivity analysis (dashed lines are bootstrap pointwise 95% CIs); see the Statistical Analysis Plan for details. The upper boundary of the green shaded area is the estimate of the reverse cumulative distribution function of the marker in baseline SARS-CoV-2 negative per-protocol vaccine recipients in Latin America. Analyses adjusted for baseline behavioral risk score. Curves are plotted over the range from the 2.5th percentile to the 97.5th percentile of each marker: Spike IgG, negative response to 238 BAU/ml; RBD IgG, negative response to 173 BAU/ml; nAb-ID50, unquantifiable to 109 IU50/ml. BAU, binding antibody units; CI, confidence interval; IU, international units; nAb-ID50, 50% inhibitory dilution neutralizing antibody. Positivity cutoffs: 10.8424 BAU/ml for Spike and 14.0858 BAU/ml for RBD. LLOQ, lower limit of quantitation = 4.8975 IU50/ml for nAb-ID50.

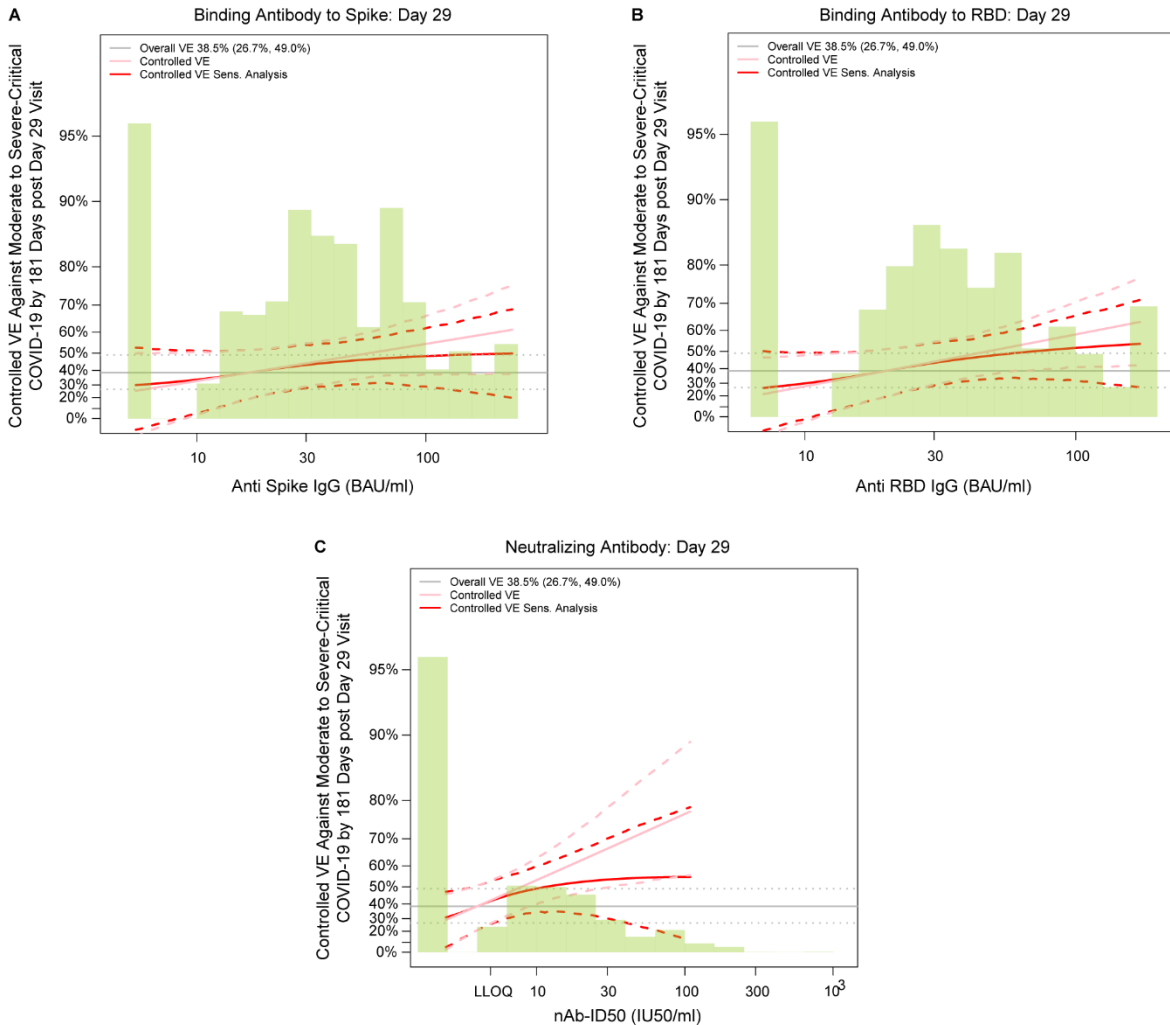

**Supplementary Fig. 47. Vaccine efficacy with sensitivity analysis against moderate to severe-critical COVID-19 by D29 antibody marker level in participants in South Africa.** Analyses were performed in baseline SARS-CoV-2 seronegative per-protocol vaccine recipients in South Africa. Estimates were obtained using the method of Gilbert et al.<sup>1</sup> Each point on the curve represents the vaccine efficacy at the given D29 antibody marker level: **(A)** anti-Spike IgG concentration, **(B)** anti-RBD IgG concentration, **(C)** neutralizing antibody titer (nAb-ID50). The pink solid line is point estimates assuming no unmeasured confounding; the dashed lines are bootstrap pointwise 95% CIs. The red solid line is point estimates assuming unmeasured confounding in a sensitivity analysis (dashed lines are bootstrap pointwise 95% CIs); see the Statistical Analysis Plan for details. The upper boundary of the green shaded area is the estimate of the reverse cumulative distribution function of the marker in baseline SARS-CoV-2 negative per-protocol vaccine recipients in South Africa. Analyses adjusted for baseline behavioral risk score. Curves are plotted over the range from the 2.5th percentile to the 97.5th percentile of each marker: Spike IgG, negative response to 238 BAU/ml; RBD IgG, negative response to 173 BAU/ml; nAb-ID50, unquantifiable to 82.9 IU50/ml. BAU, binding antibody units; CI, confidence interval; IU, international units; nAb-ID50, 50% inhibitory dilution neutralizing antibody. Positivity cutoffs: 10.8424 BAU/ml for Spike and 14.0858 BAU/ml for RBD. LLOQ, lower limit of quantitation = 4.8975 IU50/ml for nAb-ID50.

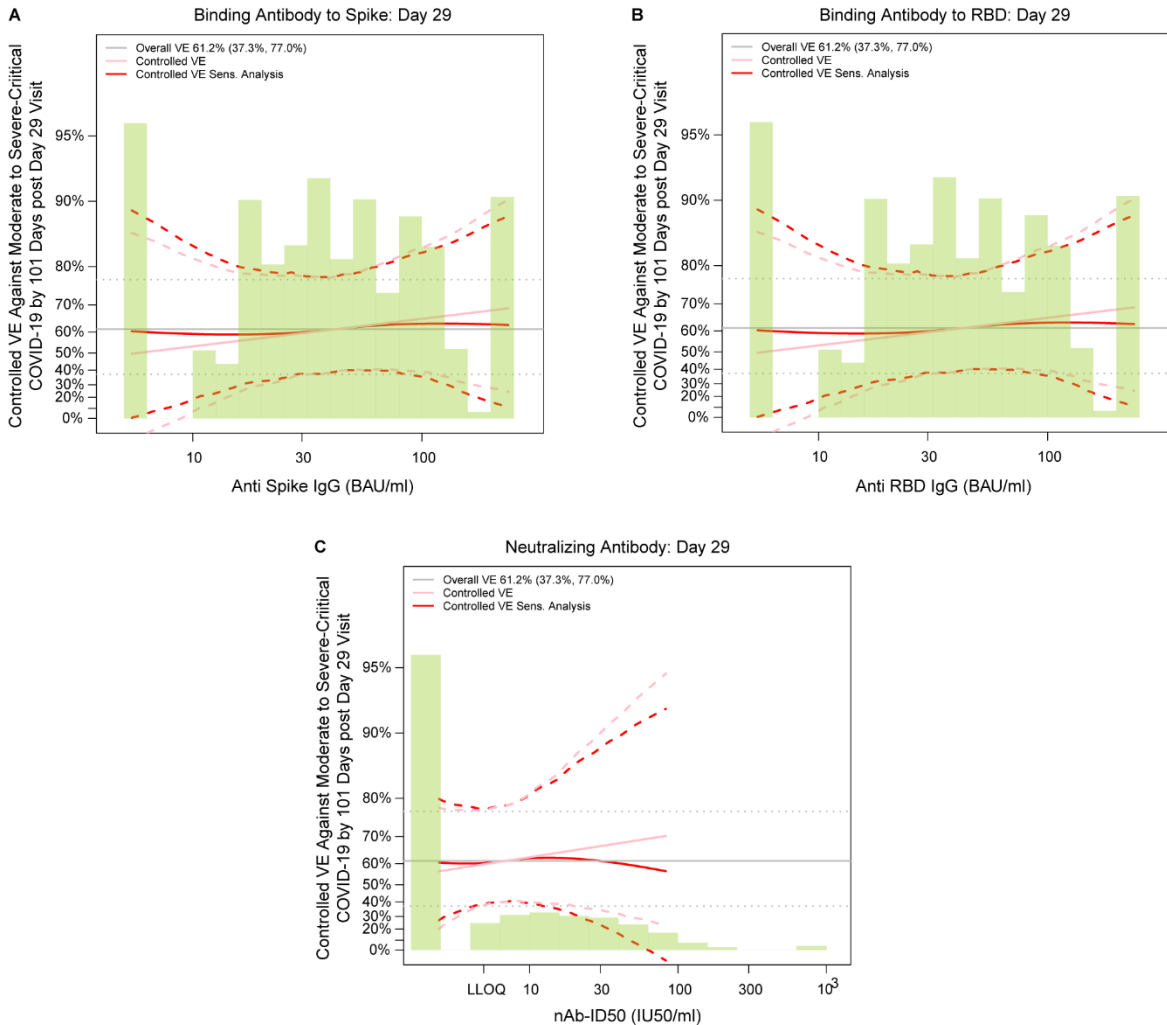

**Supplementary Fig. 48. Vaccine efficacy with sensitivity analysis against moderate to severe-critical COVID-19 by D29 antibody marker level in participants in the United States.** Analyses were performed in baseline SARS-CoV-2 seronegative per-protocol vaccine recipients in the United States. Estimates were obtained using the method of Gilbert et al.<sup>1</sup> Each point on the curve represents the vaccine efficacy at the given D29 antibody marker level: **(A)** anti-Spike IgG concentration, **(B)** anti-RBD IgG concentration, **(C)** neutralizing antibody titer (nAb-ID50). The pink solid line is point estimates assuming no unmeasured confounding; the dashed lines are bootstrap pointwise 95% CIs. The red solid line is point estimates assuming unmeasured confounding in a sensitivity analysis (dashed lines are bootstrap pointwise 95% CIs); see the Statistical Analysis Plan for details. The upper boundary of the green shaded area is the estimate of the reverse cumulative distribution function of the marker in baseline SARS-CoV-2 negative per-protocol vaccine recipients in the United States. Analyses adjusted for baseline behavioral risk score. Curves are plotted over the range from the 2.5th percentile to the 97.5th percentile of each marker: Spike IgG, negative response to 238 BAU/ml; RBD IgG, negative response to 173 BAU/ml; nAb-ID50, unquantifiable to 151 IU50/ml. BAU, binding antibody units; CI, confidence interval; IU, international units; nAb-ID50, 50% inhibitory dilution neutralizing antibody. Positivity cutoffs: 10.8424 BAU/ml for Spike and 14.0858 BAU/ml for RBD. LLOQ, lower limit of quantitation = 4.8975 IU50/ml for nAb-ID50.

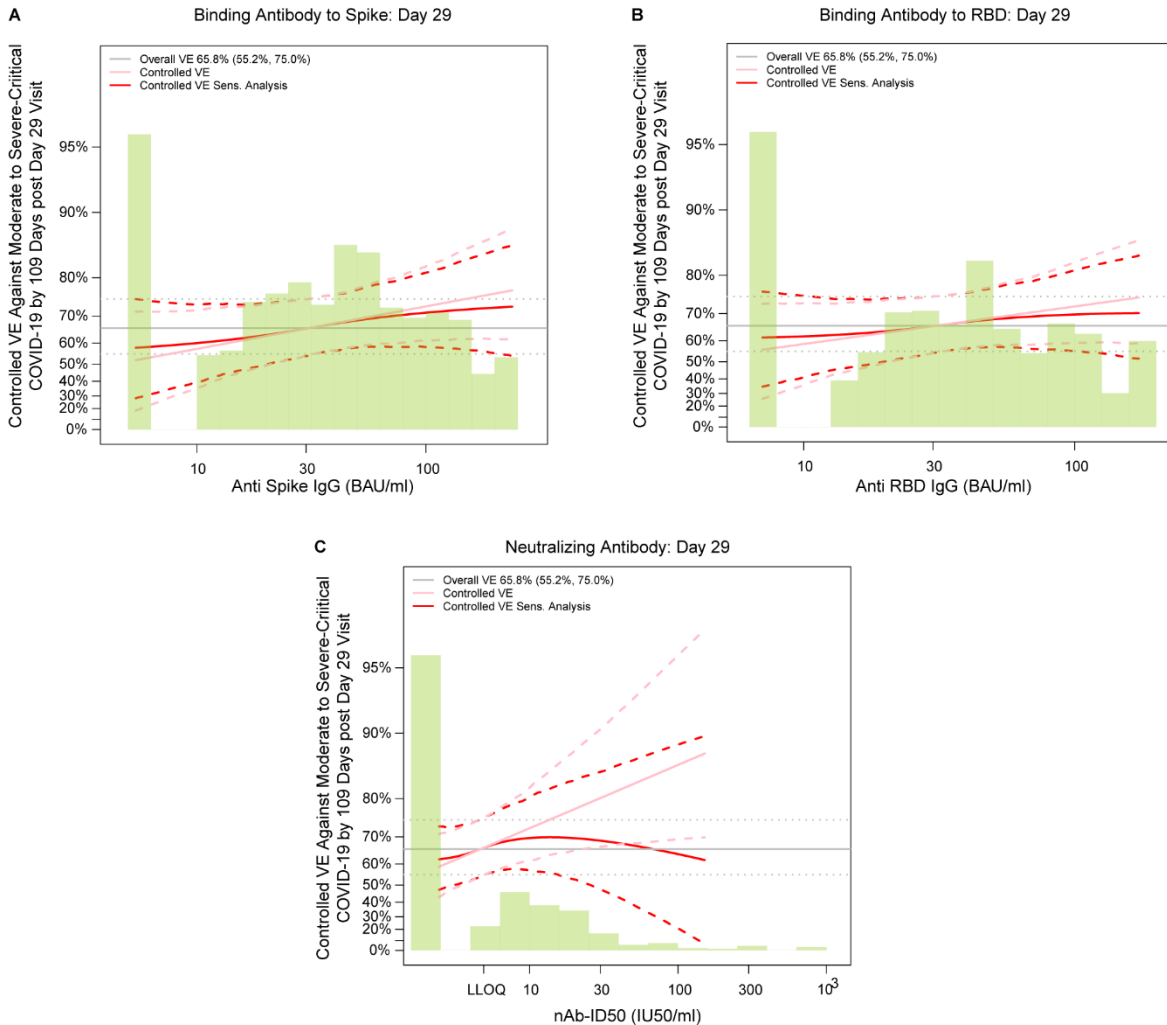



**Supplementary Fig. 49. Stochastic interventional vaccine efficacy (SVE) against moderate to severe-critical COVID-19 under hypothetical shifts in D29 antibody level, for all geographic regions pooled.** Analyses were performed in baseline SARS-CoV-2 seronegative per-protocol vaccine recipients. The y-axis plots estimated SVE, with 95% confidence intervals, for a vaccine that elicits hypothetical D29 geometric mean (A) anti-Spike IgG concentration, (B) anti-RBD IgG concentration, or (C) nAb-ID50 titer as indicated on the x-axis. SVE estimates were obtained using the method described in Hejazi et al.<sup>2</sup> The vertical red line corresponds to the geometric mean concentration or titer in the ENSEMBLE study population (baseline negative per-protocol vaccine recipients in the immunogenicity subcohort) and the horizontal red line corresponds to the estimated VE against moderate to severe-critical COVID-19 in ENSEMBLE (by 181 days post D29) at a shift of 0, i.e., the observed marker level. BAU, binding antibody units; IU, international units; LLOQ, lower limit of quantitation; nAb-ID50, 50% inhibitory dilution neutralizing antibody; Pos.Cutoff, positivity cutoff.

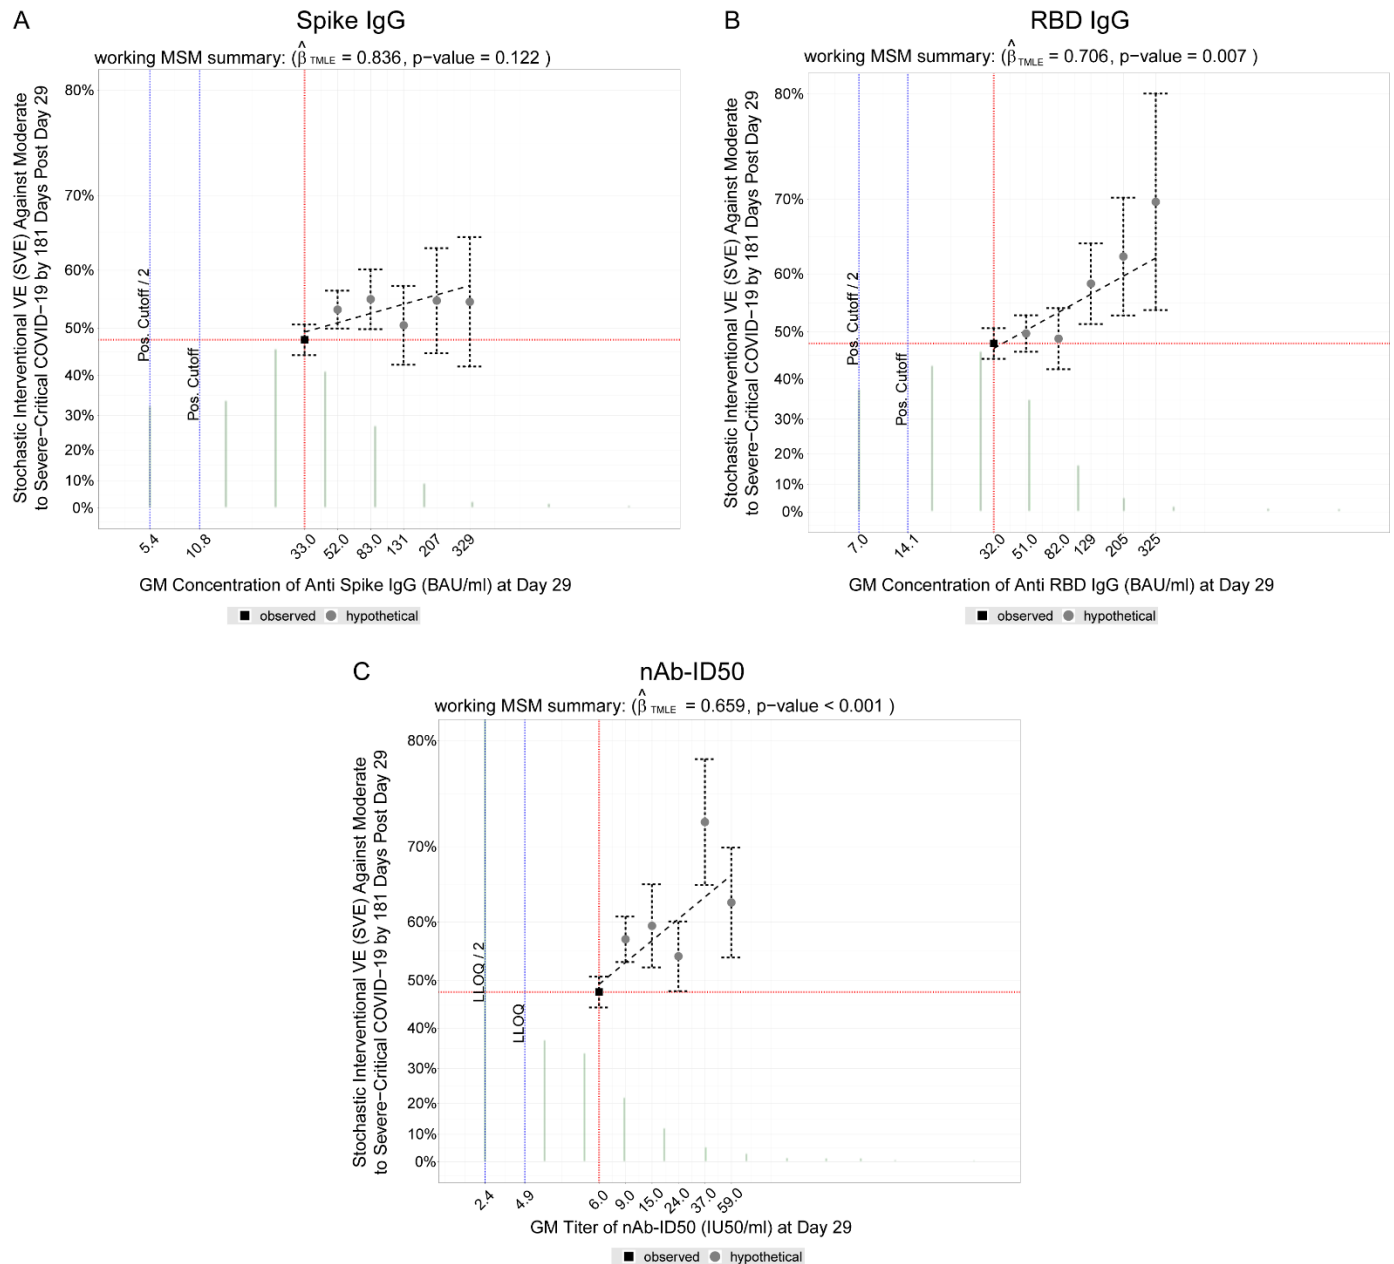

**Supplementary Fig. 50. Stochastic interventional vaccine efficacy (SVE) against moderate to severe-critical COVID-19 under hypothetical shifts in D29 nAb-ID50 titer, for participants in Latin America.** Analyses were performed in baseline SARS-CoV-2 seronegative per-protocol vaccine recipients. The y-axis plots estimated SVE, with 95% confidence intervals, for a vaccine that elicits hypothetical D29 geometric mean nAb-ID50 titer as indicated on the x-axis. SVE estimates were obtained using the method described in Hejazi et al.<sup>2</sup> The vertical red line corresponds to the geometric mean concentration or titer in the ENSEMBLE study population (baseline negative per-protocol vaccine recipients in the immunogenicity subcohort) and the horizontal red line corresponds to the estimated VE against moderate to severe-critical COVID-19 in ENSEMBLE (by 181 days post D29) at a shift of 0, i.e., the observed marker level. IU, international units; LLOQ, lower limit of quantitation; nAb-ID50, 50% inhibitory dilution neutralizing antibody.

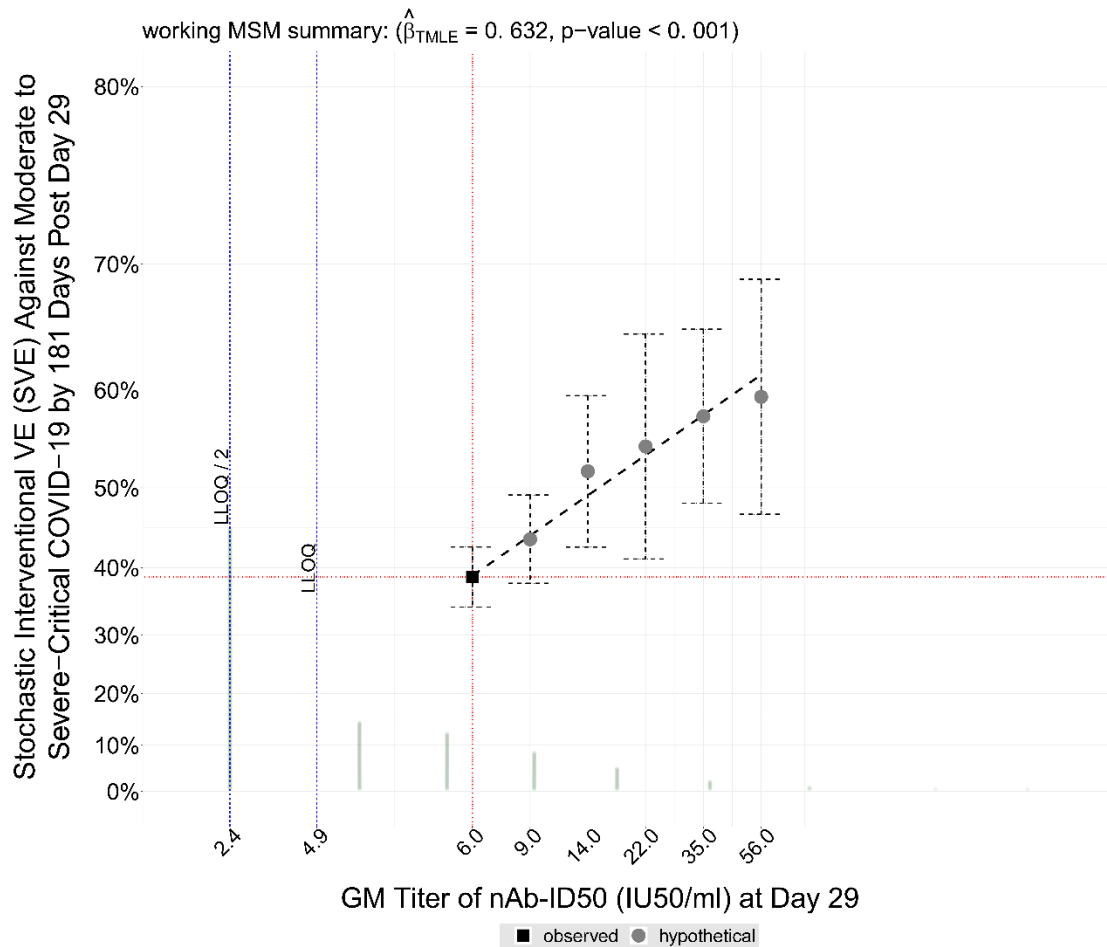

**Supplementary Fig. 51. Exposure-proximal vaccine efficacy against severe-critical COVID-19 by current antibody marker level.** Analyses were performed in baseline SARS-CoV-2 seronegative per-protocol vaccine recipients. Exposure-proximal vaccine efficacy estimates (through 170 days post-D29) were obtained using the method of Huang and Follmann,<sup>4</sup> with “current” referring to the true underlying antibody marker level not subject to technical measurement error, in a hypothetical scenario in which the value was available from serum samples collected every day over the follow-up period (see Methods). Each point on the curve represents the vaccine efficacy at the given current antibody marker level: **(A)** anti-Spike IgG concentration, **(B)** anti-RBD IgG concentration, **(C)** neutralizing antibody titer (nAb-ID50). The dashed lines are bootstrap pointwise 95% CIs. Analyses adjusted for baseline behavioral risk score and geographic region. Curves are plotted over the range from negative binding antibody response (or unquantifiable neutralizing antibody titer) to the 97.5<sup>th</sup> percentile of each current antibody marker level: Spike IgG negative response to 448 BAU/ml; RBD IgG, negative response to 579 BAU/ml; nAb-ID50, unquantifiable to 73.4 IU50/ml. Positivity cutoffs: 10.8424 BAU/ml for Spike and 14.0858 BAU/ml for RBD; nAb-ID50 LLOQ=4.8975 IU50/ml. BAU, binding antibody units; CI, confidence interval; IU, international units; LLOQ, lower limit of quantitation; nAb-ID50, 50% inhibitory dilution neutralizing antibody.

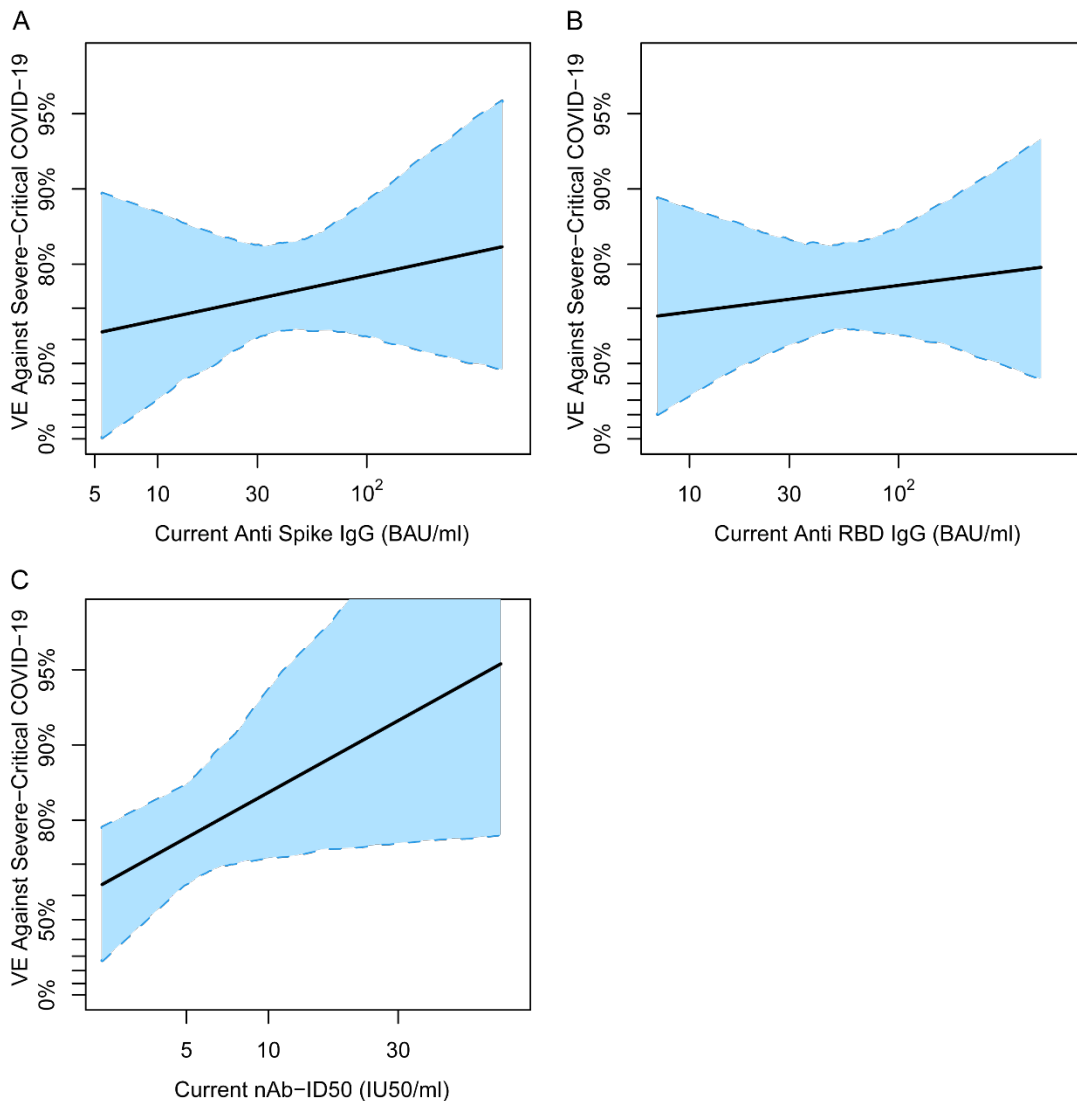

**Supplementary Fig. 52. Exposure-proximal vaccine efficacy against moderate COVID-19 by current antibody marker level.** Analyses were performed in baseline SARS-CoV-2 seronegative per-protocol vaccine recipients. Exposure-proximal vaccine efficacy estimates (through 181 days post-D29) were obtained using the method of Huang and Follmann,<sup>4</sup> with “current” referring to the true underlying antibody marker level not subject to technical measurement error, in a hypothetical scenario in which the value was available from serum samples collected every day over the follow-up period (see Methods). Each point on the curve represents the vaccine efficacy at the given current antibody marker level: **(A)** anti-Spike IgG concentration, **(B)** anti-RBD IgG concentration, **(C)** neutralizing antibody titer (nAb-ID50). The dashed lines are bootstrap pointwise 95% CIs. Analyses adjusted for baseline behavioral risk score and geographic region. Curves are plotted over the range from negative binding antibody response (or unquantifiable neutralizing antibody titer) to the 97.5<sup>th</sup> percentile of each current antibody marker level: Spike IgG, negative response to 352 BAU/ml; RBD IgG, negative response to 486 BAU/ml; nAb-ID50, unquantifiable to 43.4 IU50/ml. Positivity cutoffs: 10.8424 BAU/ml for Spike and 14.0858 BAU/ml for RBD; nAb-ID50 LLOQ=4.8975 IU50/ml. BAU, binding antibody units; CI, confidence interval; IU, international units; LLOQ, lower limit of quantitation; nAb-ID50, 50% inhibitory dilution neutralizing antibody.

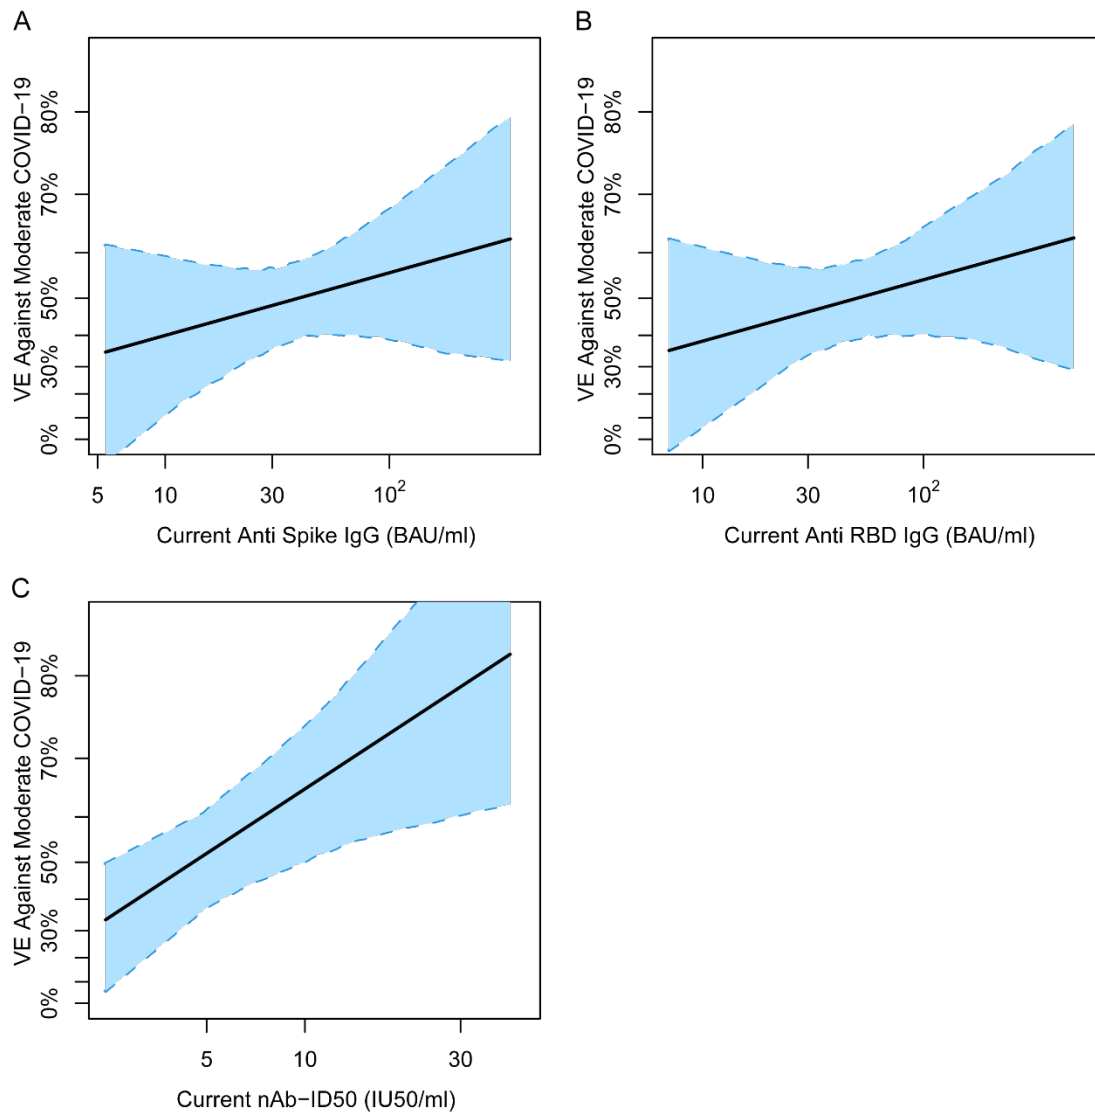

**Supplementary Fig. 53. Exposure-proximal vaccine efficacy against moderate to severe-critical COVID-19 by current antibody marker level.** Analyses were performed in baseline SARS-CoV-2 seronegative per-protocol vaccine recipients. Exposure-proximal vaccine efficacy estimates (through 181 days post-D29) were obtained using the method of Huang and Follmann,<sup>4</sup> with “current” referring to the true underlying antibody marker level not subject to technical measurement error, in a hypothetical scenario in which the value was available from serum samples collected every day over the follow-up period (see Methods). Each point on the curve represents the vaccine efficacy at the given current antibody marker level: **(A)** anti-Spike IgG concentration, **(B)** anti-RBD IgG concentration, **(C)** neutralizing antibody titer (nAb-ID50). The dashed lines are bootstrap pointwise 95% CIs. Analyses adjusted for baseline behavioral risk score and geographic region. Curves are plotted over the range from negative binding antibody response (or unquantifiable neutralizing antibody titer) to the 97.5<sup>th</sup> percentile of each current antibody marker level: Spike IgG, negative response to 364 BAU/ml; RBD IgG, negative response to 534 BAU/ml; nAb-ID50, unquantifiable to 44.8 IU50/ml. Positivity cutoffs: 10.8424 BAU/ml for Spike and 14.0858 BAU/ml for RBD; nAb-ID50 LLOQ=4.8975 IU50/ml. BAU, binding antibody units; CI, confidence interval; IU, international units; LLOQ, lower limit of quantitation; nAb-ID50, 50% inhibitory dilution neutralizing antibody.

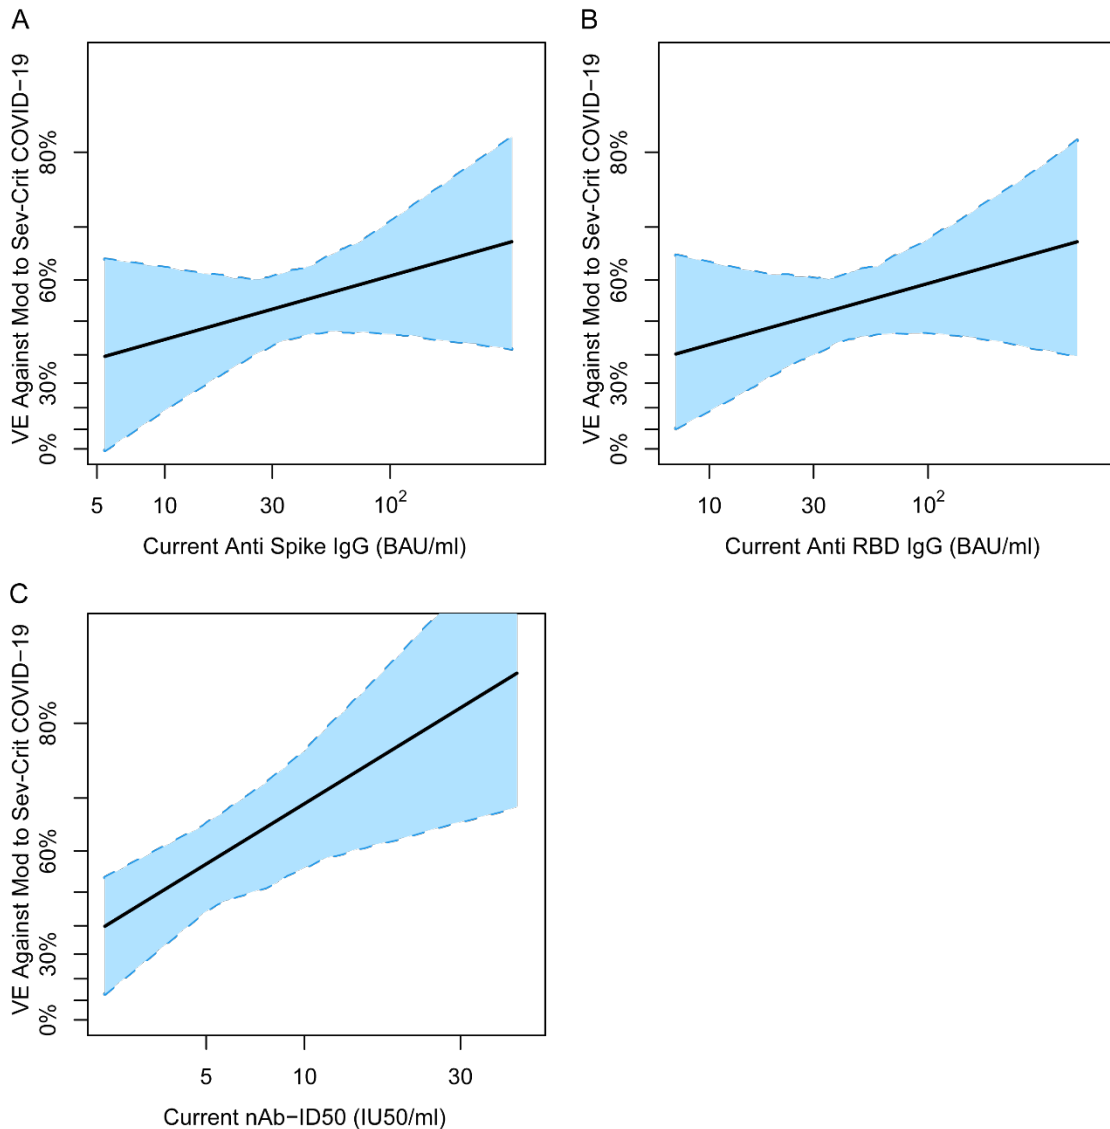

**Supplementary Fig. 54. Exposure-proximal vaccine efficacy against severe-critical COVID-19 by current antibody marker level, for the Latin America cohort.** Analyses were performed in baseline SARS-CoV-2 seronegative per-protocol vaccine recipients. Exposure-proximal vaccine efficacy estimates (through 170 days post-D29) were obtained using the method of Huang and Follmann,<sup>4</sup> with “current” referring to the true underlying antibody marker level not subject to technical measurement error, in a hypothetical scenario in which the value was available from serum samples collected every day over the follow-up period (see Methods). Each point on the curve represents the vaccine efficacy at the given current antibody marker level: **(A)** anti-Spike IgG concentration, **(B)** anti-RBD IgG concentration, **(C)** neutralizing antibody titer (nAb-ID50). The dashed lines are bootstrap pointwise 95% CIs. Analyses adjusted for baseline behavioral risk score. Curves are plotted over the range from negative binding antibody response (or unquantifiable neutralizing antibody titer) to the 97.5<sup>th</sup> percentile of each current antibody marker level: Spike IgG, negative response to 410 BAU/ml; RBD IgG, negative response to 611 BAU/ml; nAb-ID50, unquantifiable to 32.0 IU50/ml. Positivity cutoffs: 10.8424 BAU/ml for Spike and 14.0858 BAU/ml for RBD; nAb-ID50 LLOQ=4.8975 IU50/ml. BAU, binding antibody units; CI, confidence interval; IU, international units; LLOQ, lower limit of quantitation; nAb-ID50, 50% inhibitory dilution neutralizing antibody. United States- and South Africa-specific plots are not shown due to the low numbers of vaccine endpoints (6 and 5, respectively), which resulted in substantially wide 95% CIs.

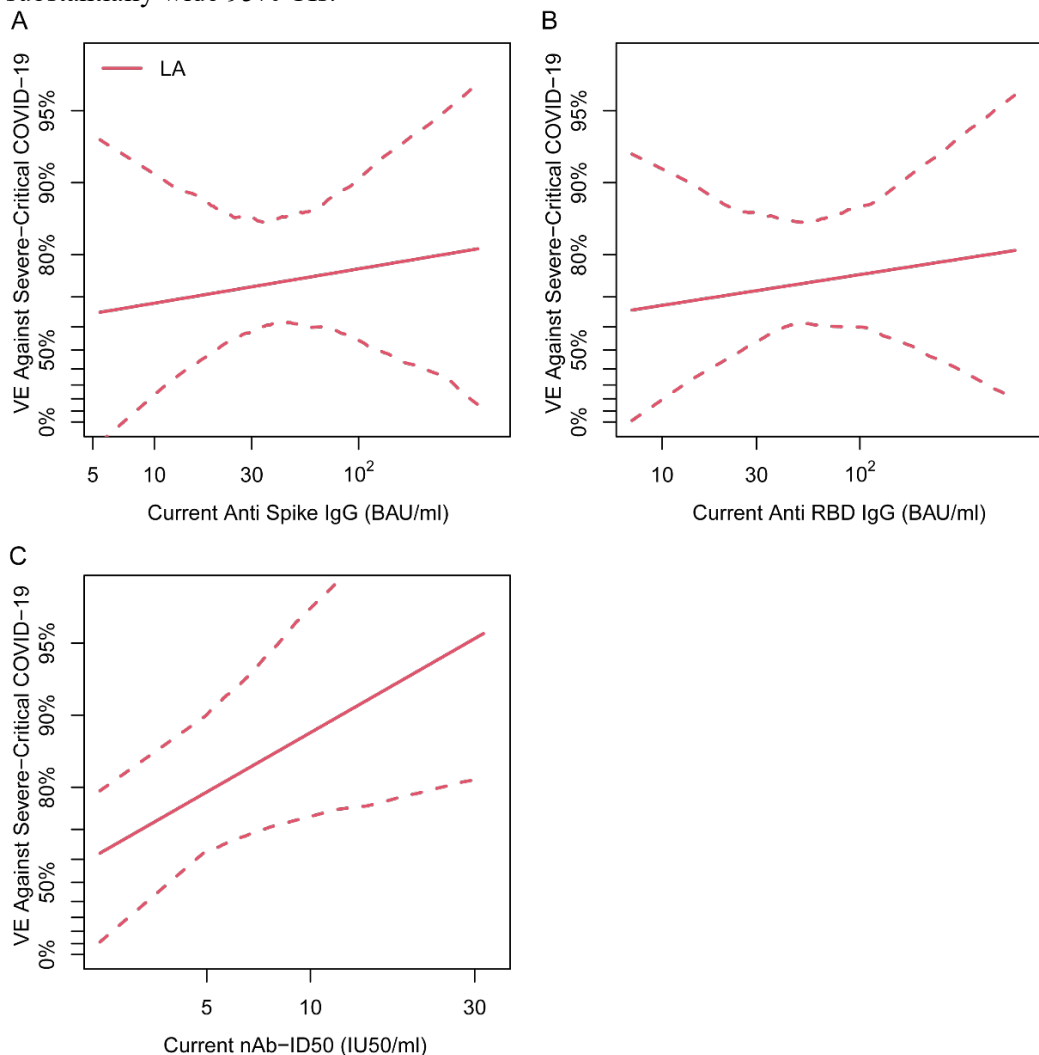

**Supplementary Fig. 55. Exposure-proximal vaccine efficacy against moderate COVID-19 by current antibody marker level, for the Latin America cohort.** Analyses were performed in baseline SARS-CoV-2 seronegative per-protocol vaccine recipients. Exposure-proximal vaccine efficacy estimates (through 181 days post-D29) were obtained using the method of Huang and Follmann,<sup>4</sup> with “current” referring to the true underlying antibody marker level not subject to technical measurement error, in a hypothetical scenario in which the value was available from serum samples collected every day over the follow-up period (see Methods). Each point on the curve represents the vaccine efficacy at the given current antibody marker level: **(A)** anti-Spike IgG concentration, **(B)** anti-RBD IgG concentration, **(C)** neutralizing antibody titer (nAb-ID50). The dashed lines are bootstrap pointwise 95% CIs. Analyses adjusted for baseline behavioral risk score. Curves are plotted over the range from negative binding antibody response (or unquantifiable neutralizing antibody titer) to the 97.5<sup>th</sup> percentile of each current antibody marker level: Spike IgG, negative response to 397 BAU/ml; RBD IgG, negative response to 567 BAU/ml; nAb-ID50, unquantifiable to 46.1 IU50/ml. Positivity cutoffs: 10.8424 BAU/ml for Spike and 14.0858 BAU/ml for RBD; nAb-ID50 LLOQ=4.8975 IU50/ml. BAU, binding antibody units; CI, confidence interval; IU, international units; LLOQ, lower limit of quantitation; nAb-ID50, 50% inhibitory dilution neutralizing antibody.

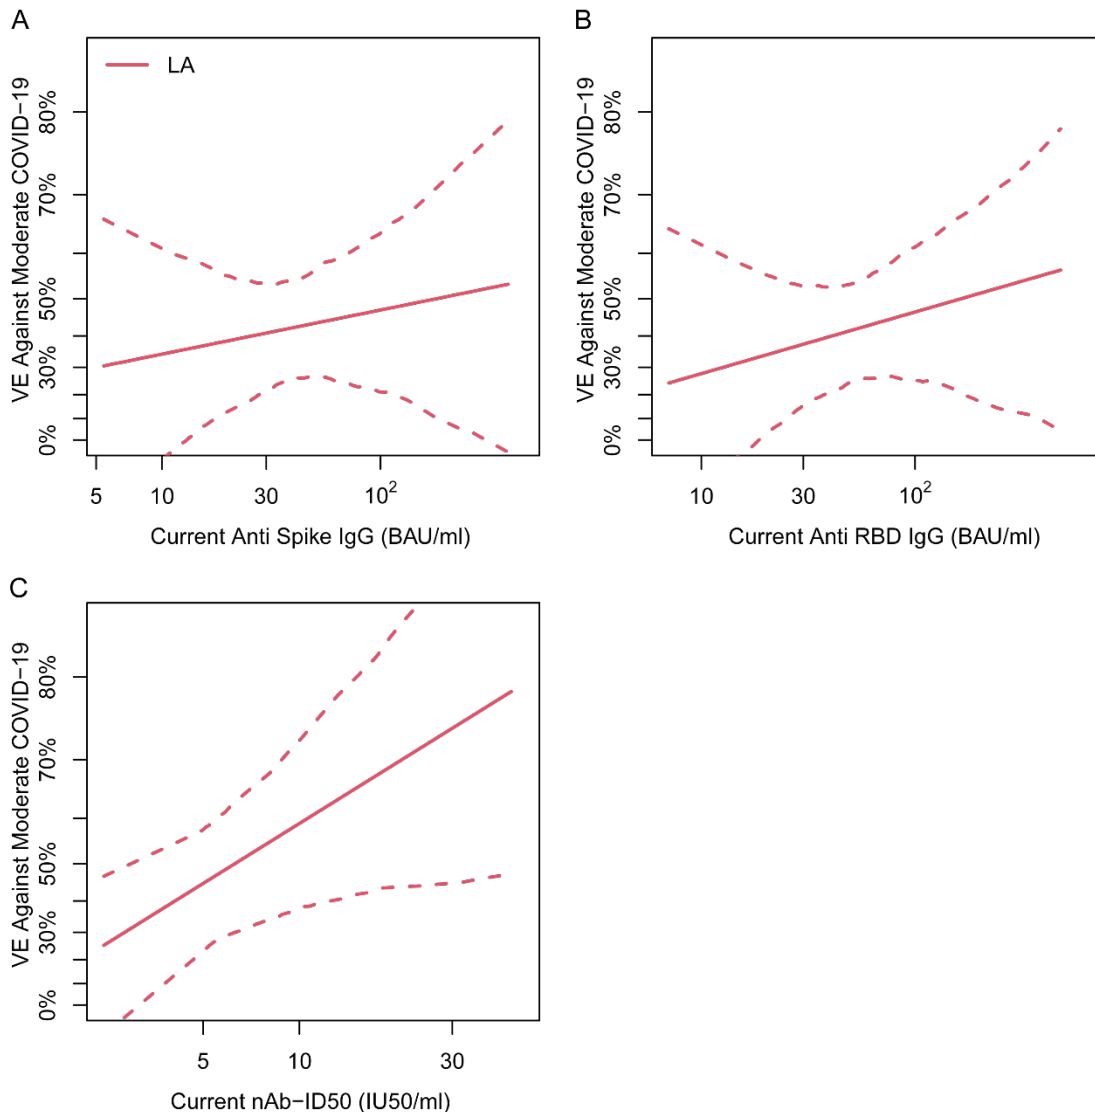

**Supplementary Fig. 56. Exposure-proximal vaccine efficacy against moderate to severe-critical COVID-19 by current antibody marker level, shown separately by geographic region.** Analyses were performed in baseline SARS-CoV-2 seronegative per-protocol vaccine recipients. Exposure-proximal vaccine efficacy estimates (through 181, 101, or 109 days post-D29 for Latin America, South America, United States, respectively) were obtained using the method of Huang and Follmann,<sup>4</sup> with “current” referring to the true underlying antibody marker level not subject to technical measurement error, in a hypothetical scenario in which the value was available from serum samples collected every day over the follow-up period (see Methods). Each point on the curve represents the vaccine efficacy at the given current antibody marker level: **(A)** anti-Spike IgG concentration, **(B)** anti-RBD IgG concentration, **(C)** neutralizing antibody titer (nAb-ID50). The dashed lines are bootstrap pointwise 95% CIs. Analyses adjusted for baseline behavioral risk score. Curves are plotted over the range from negative binding antibody response (or unquantifiable neutralizing antibody titer) to the 97.5<sup>th</sup> percentile of each current antibody marker level: Spike IgG, negative response to 408 (Latin America), 328 (South Africa) or 158 (United States) BAU/ml; RBD IgG, negative response to 573 (Latin America), 353 (South Africa) or 187 (United States) BAU/ml; nAb-ID50, unquantifiable to 46.5 (Latin America), 53.1 (South Africa) or 16.7 (United States) IU50/ml. Positivity cutoffs: 10.8424 BAU/ml for Spike and 14.0858 BAU/ml for RBD; nAb-ID50 LLOQ=4.8975 IU50/ml. BAU, binding antibody units; CI, confidence interval; IU, international units; LLOQ, lower limit of quantitation; nAb-ID50, 50% inhibitory dilution neutralizing antibody.

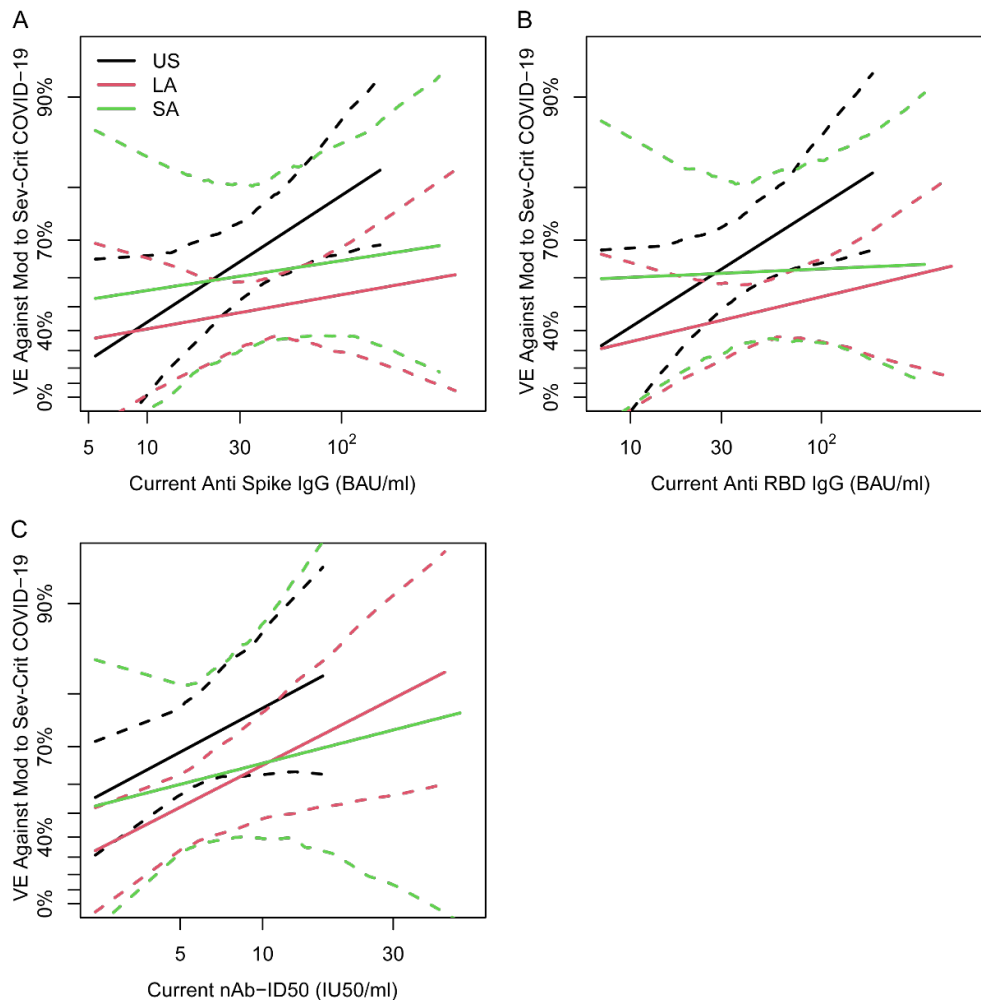



**Supplementary Fig. 57. For a random sample of 25 baseline SARS-CoV-2 seronegative vaccine recipients, D29 and D71 A) anti-Spike IgG concentration (BAU/ml), B) anti-RBD IgG concentration (BAU/ml), and C) 50% inhibitory dilution neutralizing antibody titer (nAb-ID50) measurements are shown. The 25 participants were sampled from baseline SARS-CoV-2 seronegative vaccine recipients for whom D29, D71 binding antibody data (both Spike and RBD) and nAb-ID50 data were available. These plots are shown as examples of D29 to D71 antibody trajectories; D29 and D71 antibody data were used in the exposure-proximal correlates analysis as described in Methods. Each line connects the D29, D71 measurements from a single participant. BAU, binding antibody units; IU, international units; LLOQ, lower limit of quantification; Pos.Cut, positivity cutoff; ULOQ, upper limit of quantitation.**

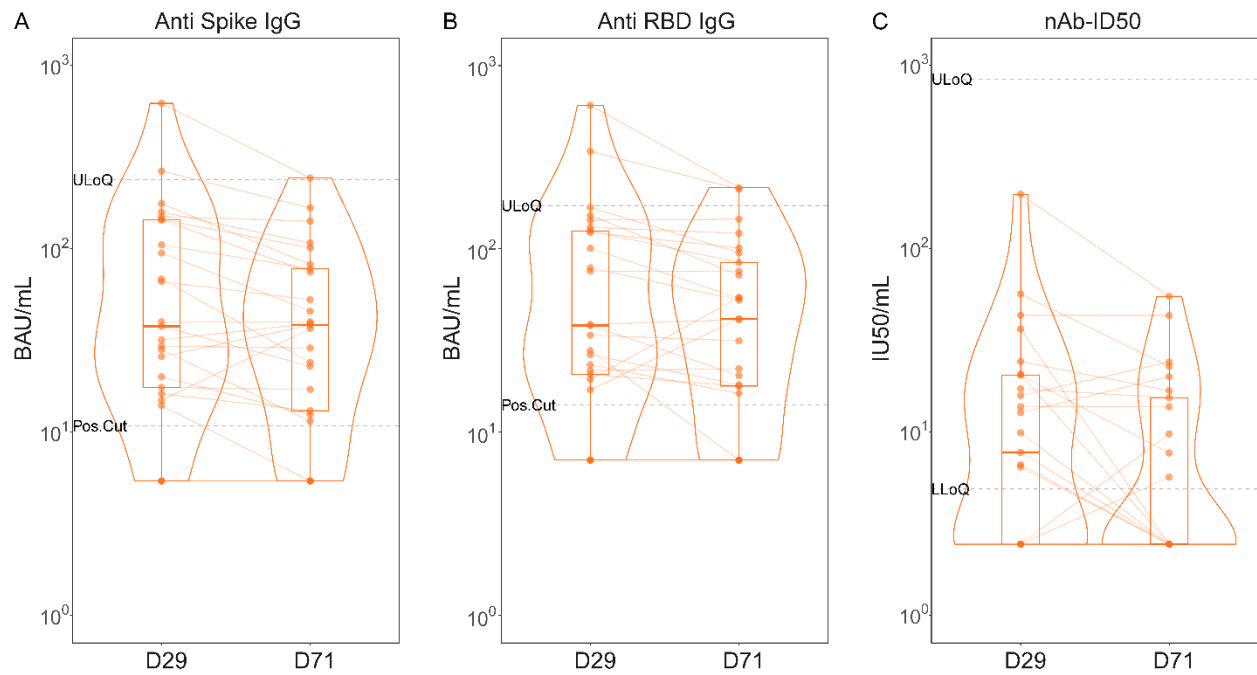

**Supplementary Fig. 58. Vaccine efficacy against symptomatic COVID-19 by neutralizing antibody (nAb) ID50 titer in five randomized, placebo-controlled COVID-19 vaccine efficacy trials.** Analyses were performed in baseline SARS-CoV-2 negative per-protocol vaccine recipients. Vaccine efficacy (VE) estimates against the primary endpoint in each trial (virologically-confirmed, symptomatic COVID-19) are shown by neutralizing antibody titer (D57 in COVE, D29 in ENSEMBLE-US, D57 in AZD1222, D35 in PREVENT-19, D56 in COV002). Each point on the curve represents the estimated vaccine efficacy at the given nAb-ID50 titer. The dotted lines indicate bootstrap pointwise 95% CIs. The histograms are estimates of the frequency distribution of nAb-ID50 titer. The follow-up periods for the VE assessment were: COVE (doses D1, D29), 7 to 100 days post D57; ENSEMBLE-US (one dose, D1), 7 to 140 days post D29; PREVENT-19 (doses D0, D21), 7 to 59 days post D35; AZD1222 (doses D1, D29), 7 to 92 days post D57; COV002 (doses D1, D29; 7 to approximately 150 days post D57). Curves are plotted over the following antibody marker ranges: COVE: 10 IU50/ml to 97.5th percentile of marker, ENSEMBLE-US: 2.5th percentile to 97.5th percentile, PREVENT-19: 2.5th percentile to 97.5th percentile, AZD1222: 2.5th percentile to 97.5th percentile, COV002: 3 to 140 IU50/ml. Baseline covariates adjusted for were: COVE: baseline risk score, comorbidity status, and Community of color status; ENSEMBLE-US, baseline risk score and geographic region; PREVENT-19: baseline risk score; AZD1222: age, baseline risk score; COV002: baseline risk score. nAb-ID50, 50% inhibitory dilution neutralizing antibody titer. The bottom panel shows the histogram of nAb-ID50 density in each trial.

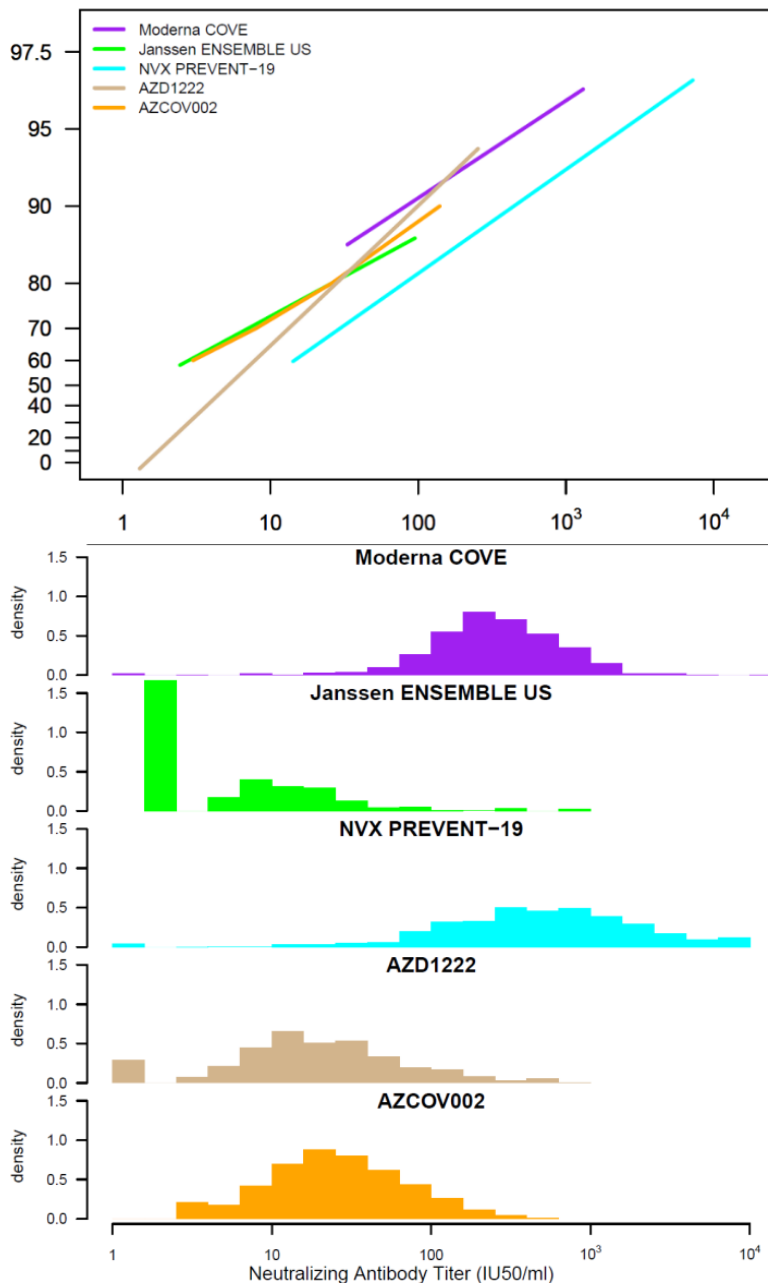

## References

1. Gilbert PB, Fong Y, Kenny A, Carone M. A Controlled Effects Approach to Assessing Immune Correlates of Protection. *Biostatistics* 2023; **24**(4): 850–65.
2. Hejazi NS, van der Laan MJ, Janes HE, Gilbert PB, Benkeser DC. Efficient nonparametric inference on the effects of stochastic interventions under two-phase sampling, with applications to vaccine efficacy trials. *Biometrics* 2021; **77**(4): 1241-53.
3. Sadoff J, Gray G, Vandebosch A, et al. Final Analysis of Efficacy and Safety of Single-Dose Ad26.COV2.S. *N Engl J Med* 2022; **386**(9): 847-60.
4. Huang Y, Follmann D. Exposure proximal immune correlates analysis. *Biostatistics* 2024; kxae031. <https://doi.org/10.1093/biostatistics/kxae031>.
